# Supplementary material for: Vaginal Microbiome and Epithelial Gene Array in Post-Menopausal Women with Moderate to Severe Dryness
Source: PubMed Central journal article supplement (PMC3206802; doi:10.1371/journal.pone.0026602), 2011-11-02

OTU\_0\_L\_iners  
p-value: 0.55527

non-dry

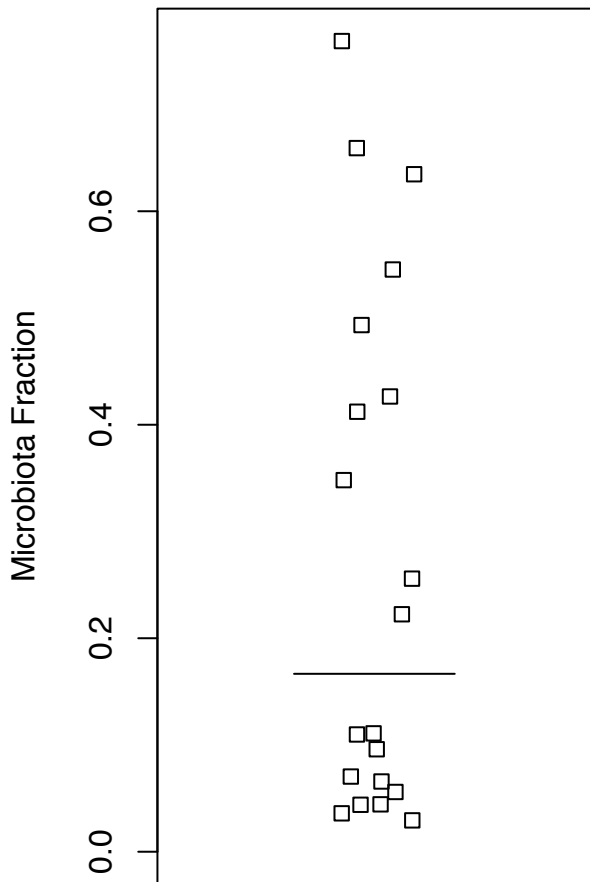

dry

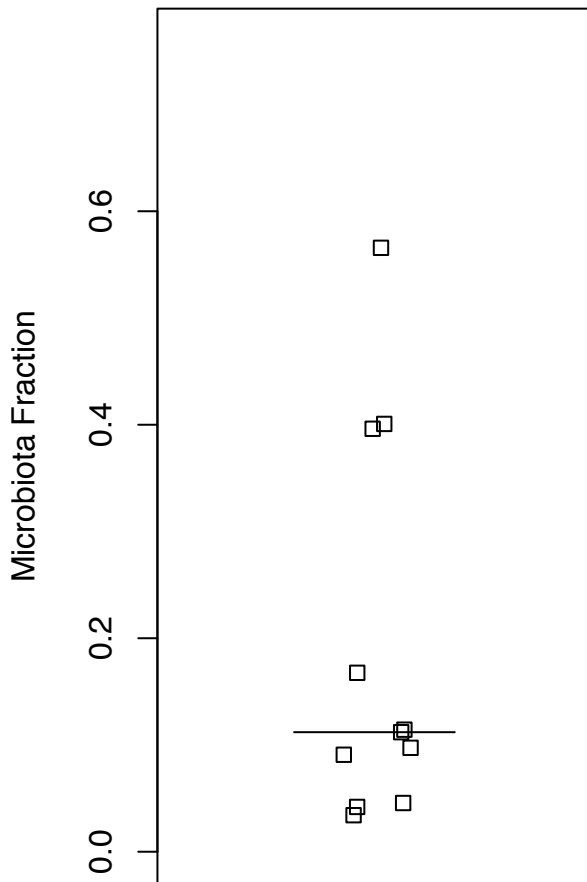

OTU\_1\_L\_crispatus

p-value: 0.02546

non-dry

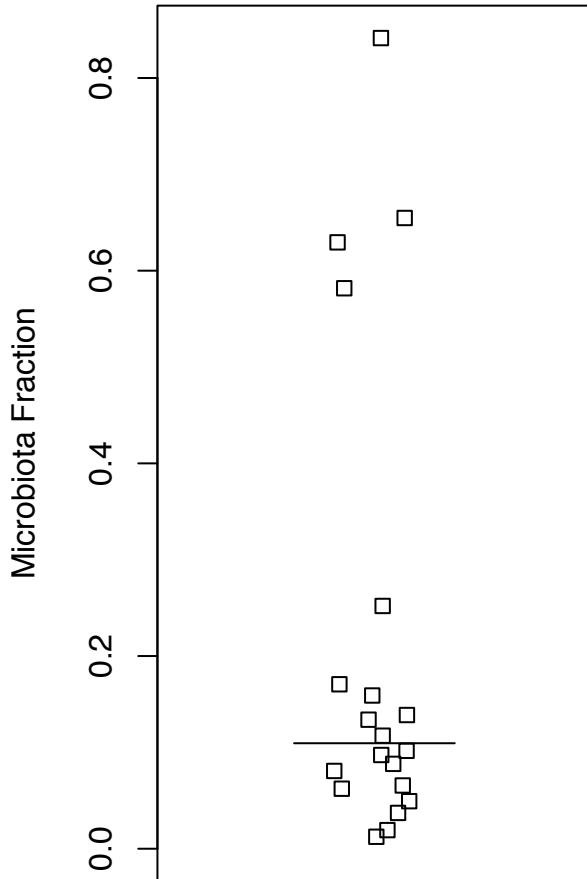

dry

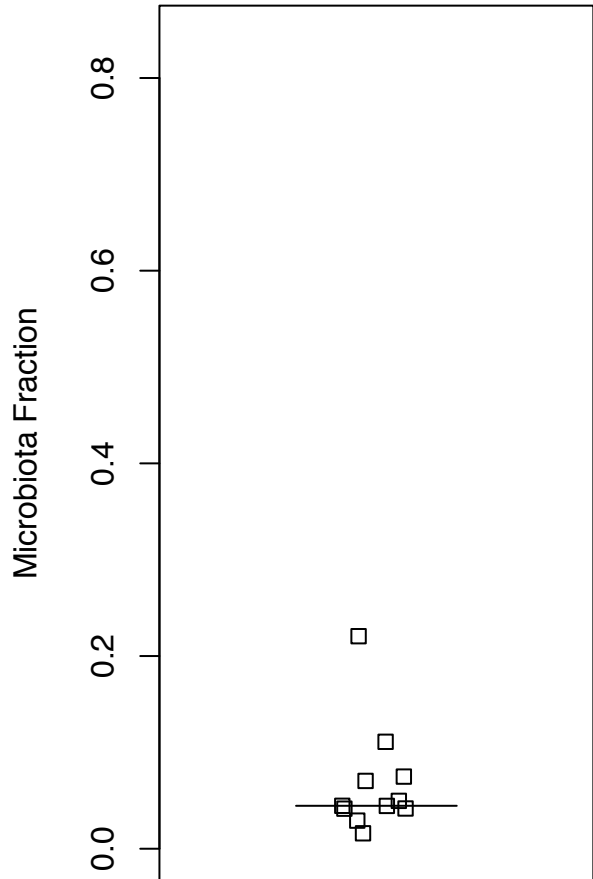

OTU\_2\_G\_vaginalis

p-value: 0.9838

non-dry

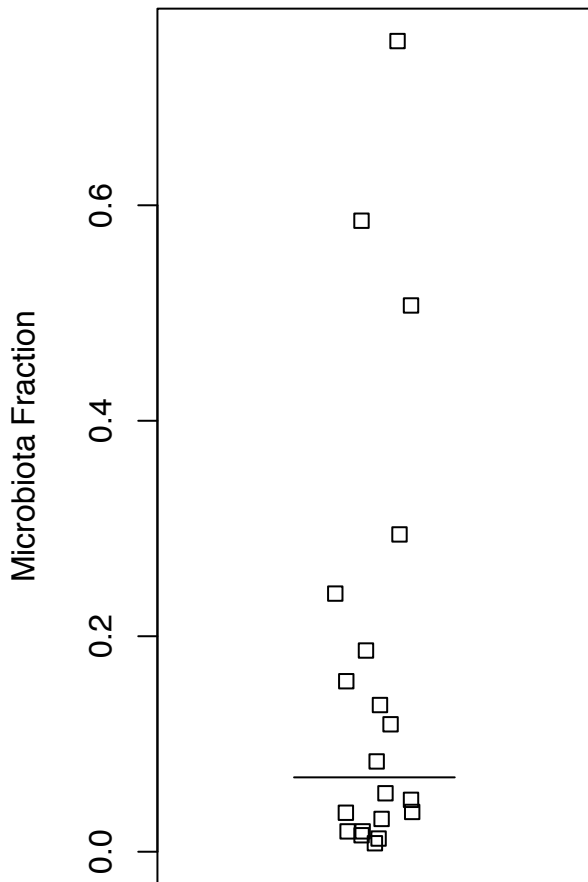

dry

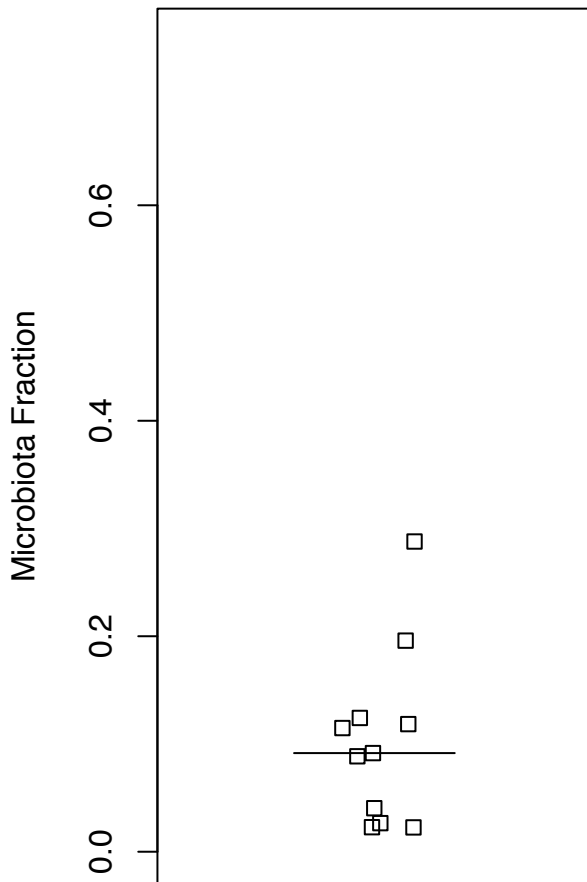

OTU\_3\_Atopobium\_vaginae

p-value: 0.19677

non-dry

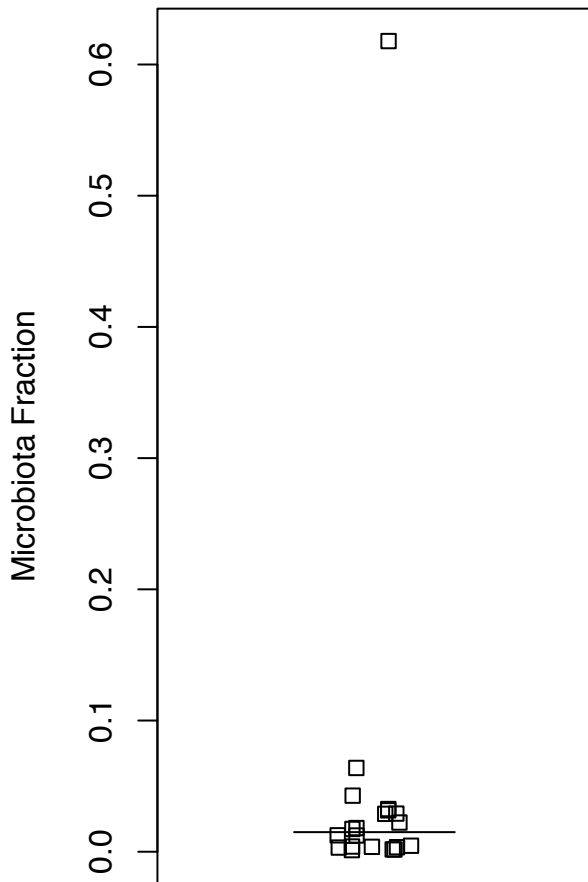

dry

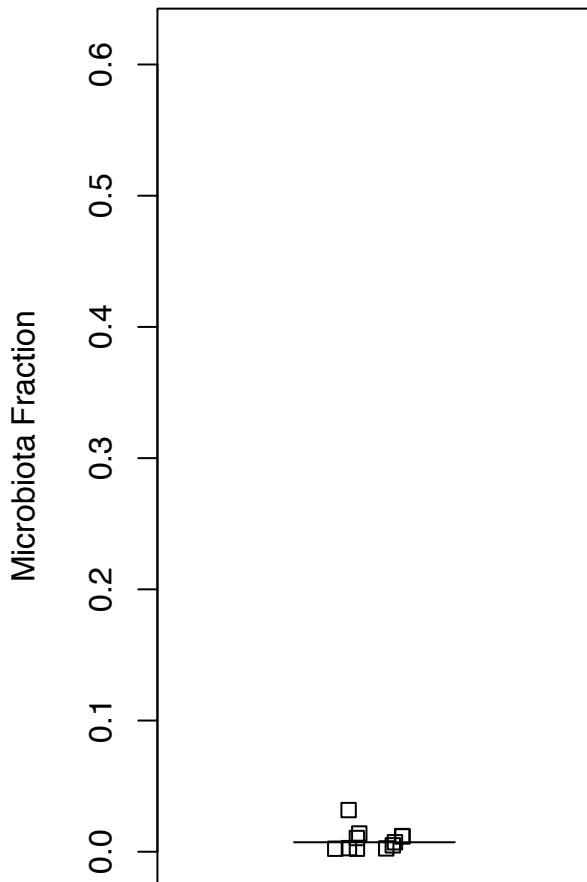

OTU\_4\_Streptococcus  
p-value: 0.64014

non-dry

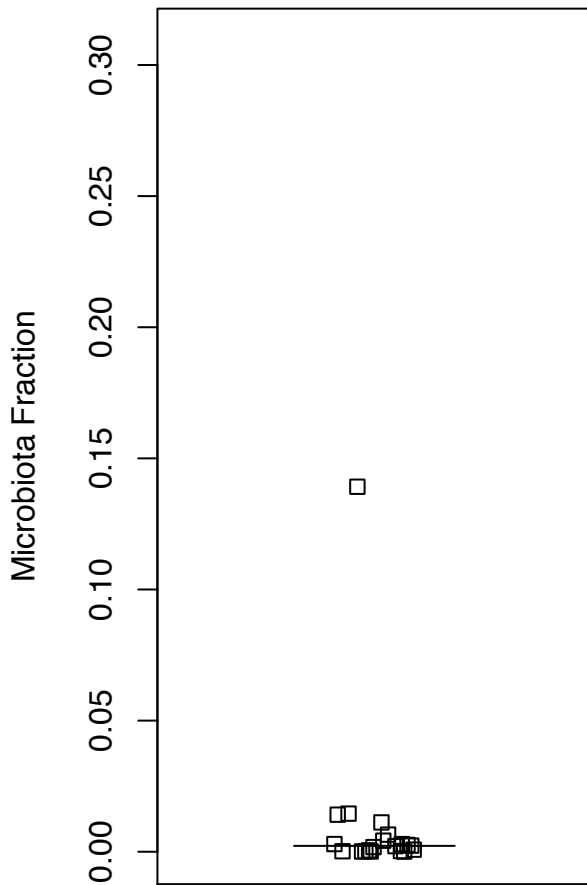

dry

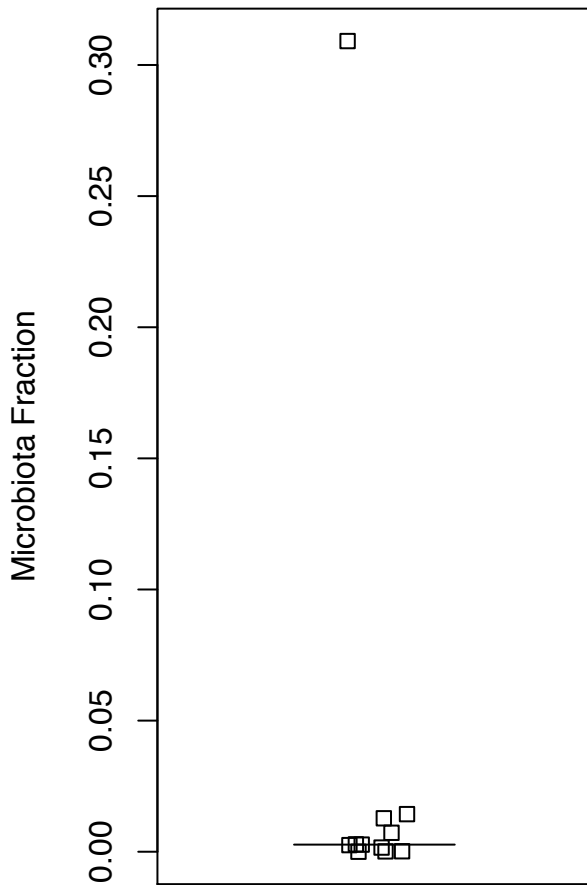

OTU\_5\_L\_jensenii

p-value: 0.11293

non-dry

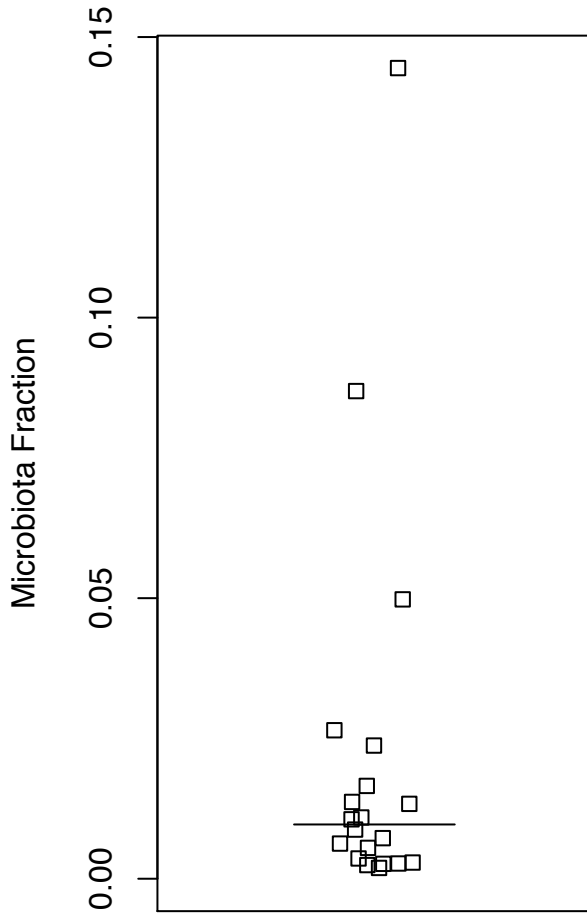

dry

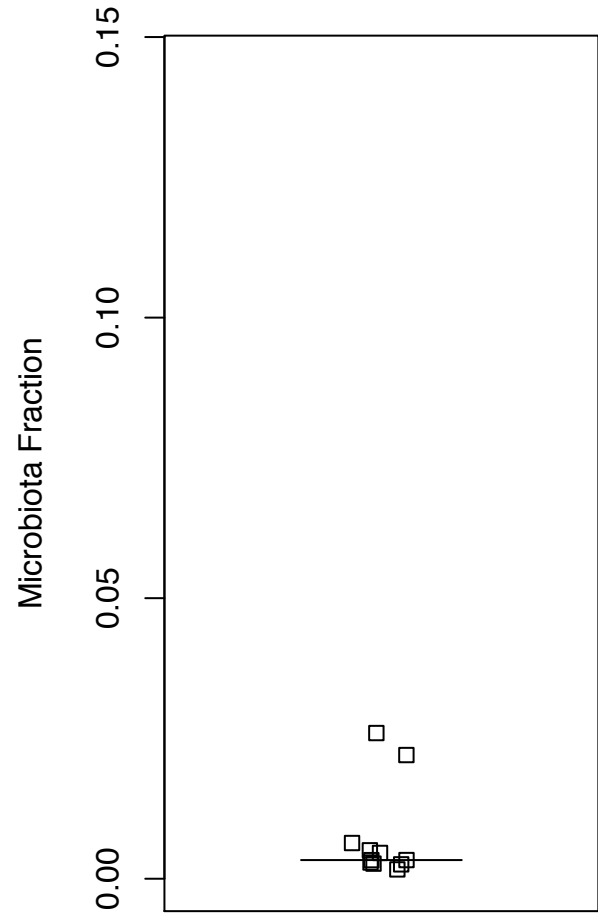



OTU\_7\_Prevotella\_bivia  
p-value: 0.52821

**non-dry**

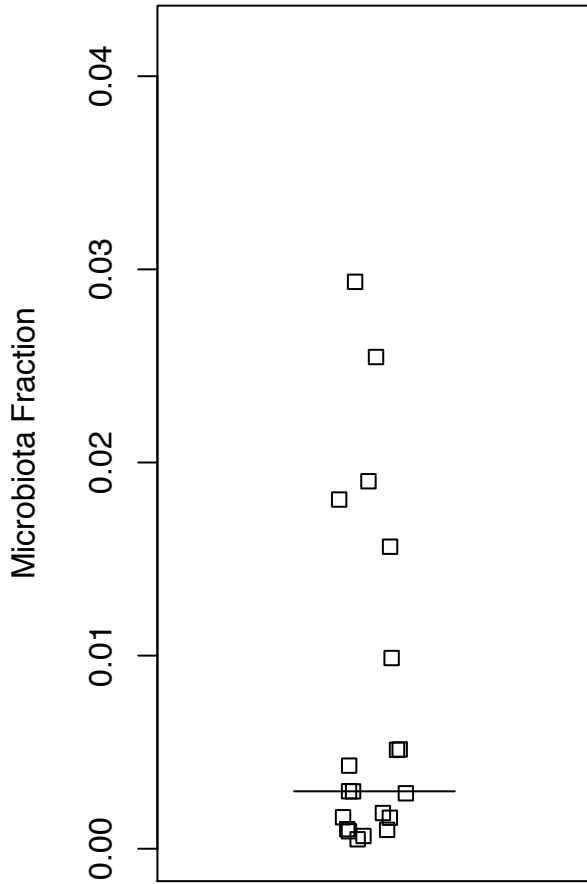

**dry**

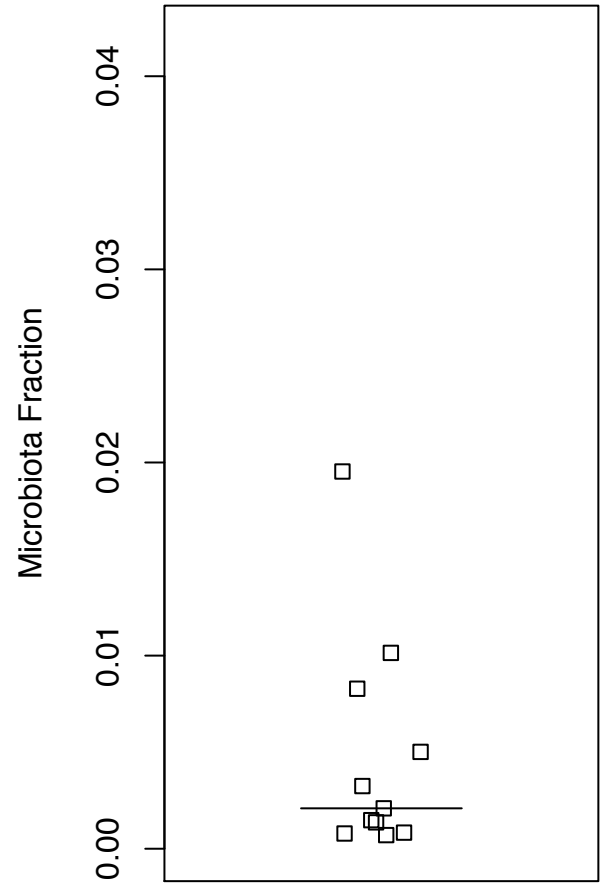



OTU\_8\_L\_johnsonii.gasseri

p-value: 0.08676

non-dry

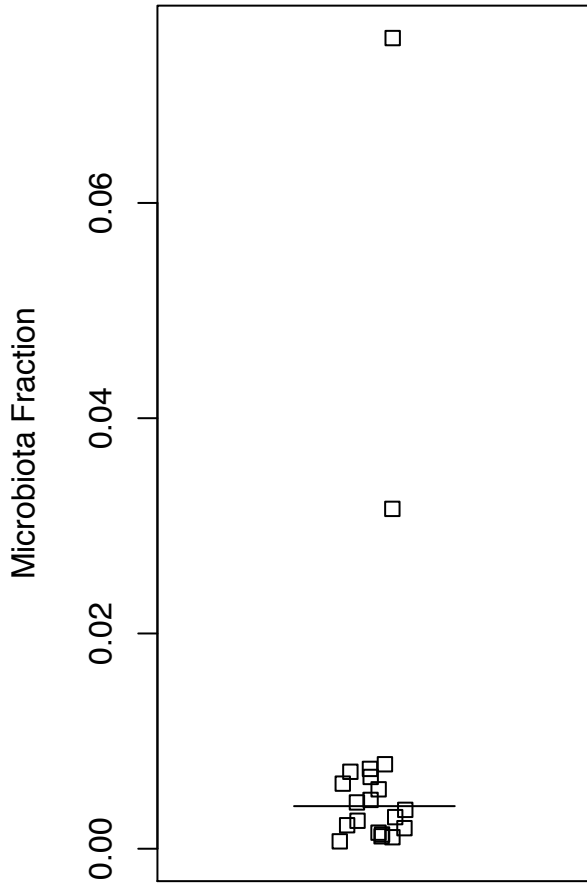

dry

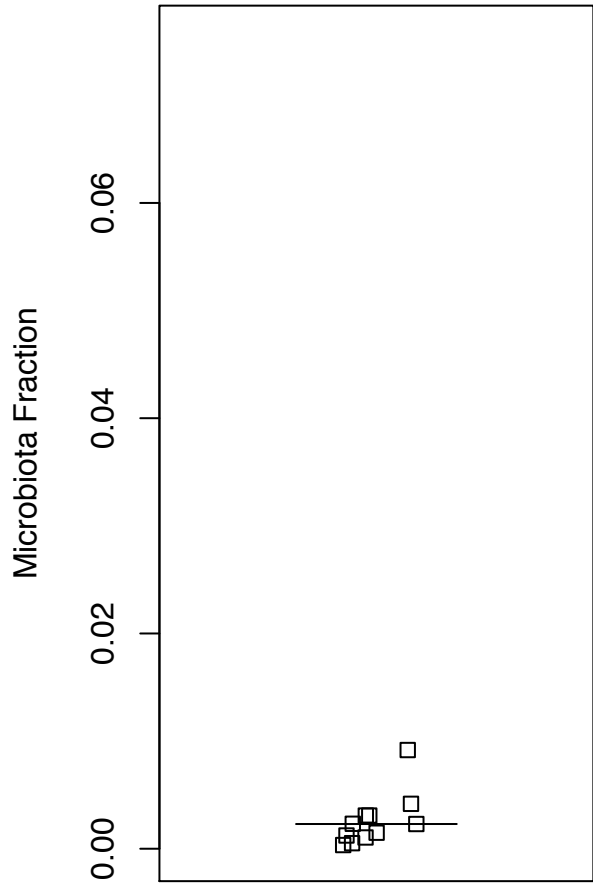





OTU\_11\_Streptococcus\_anginosus.

p-value: 0.40339

non-dry

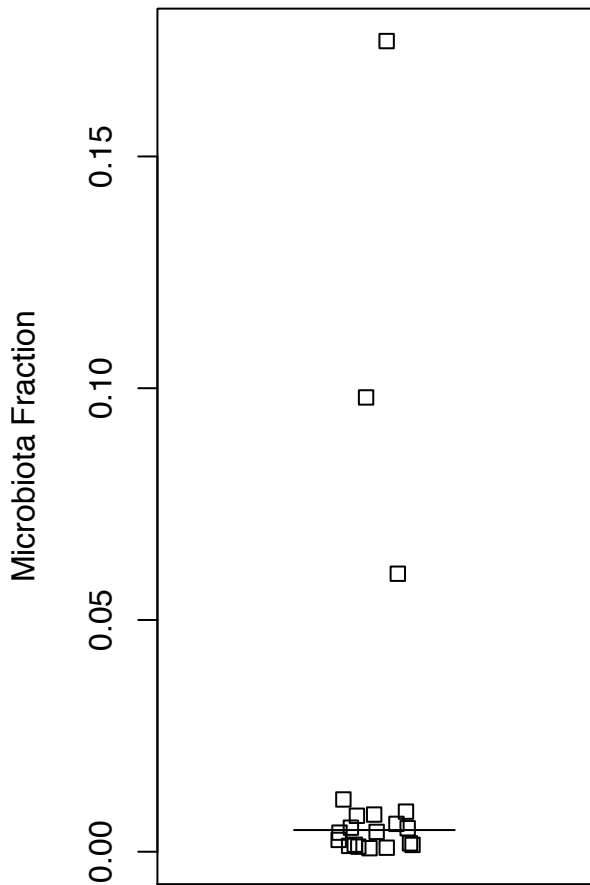

dry

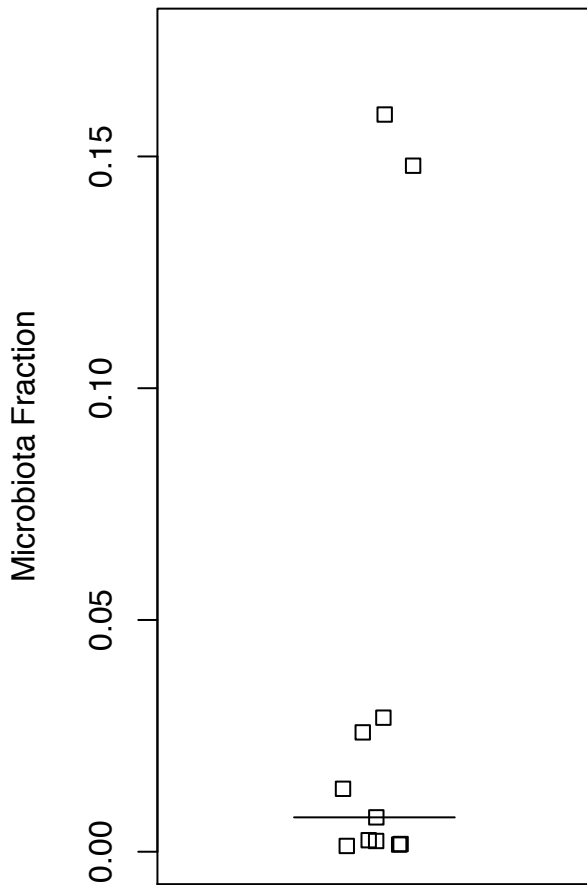











OTU\_16\_Leptotrichia\_amnionii

p-value: 0.9838

non-dry

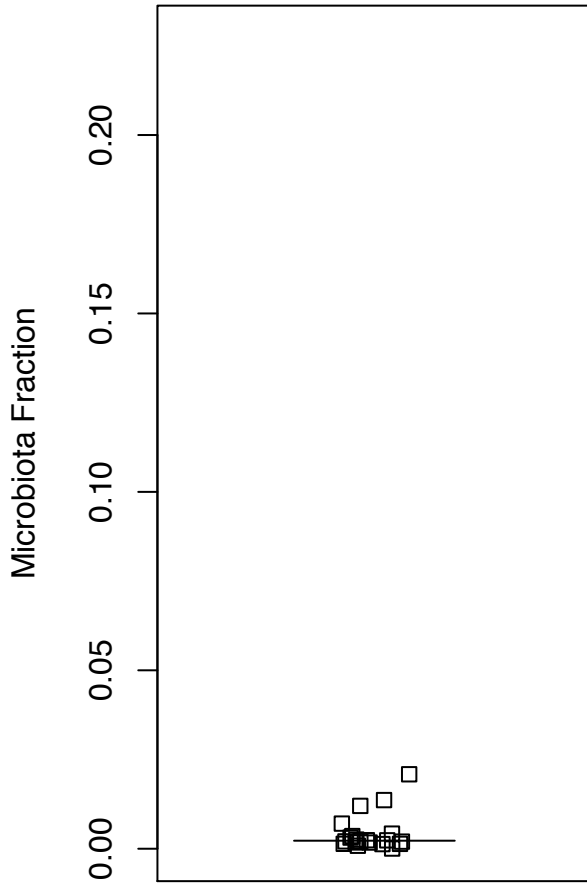

dry

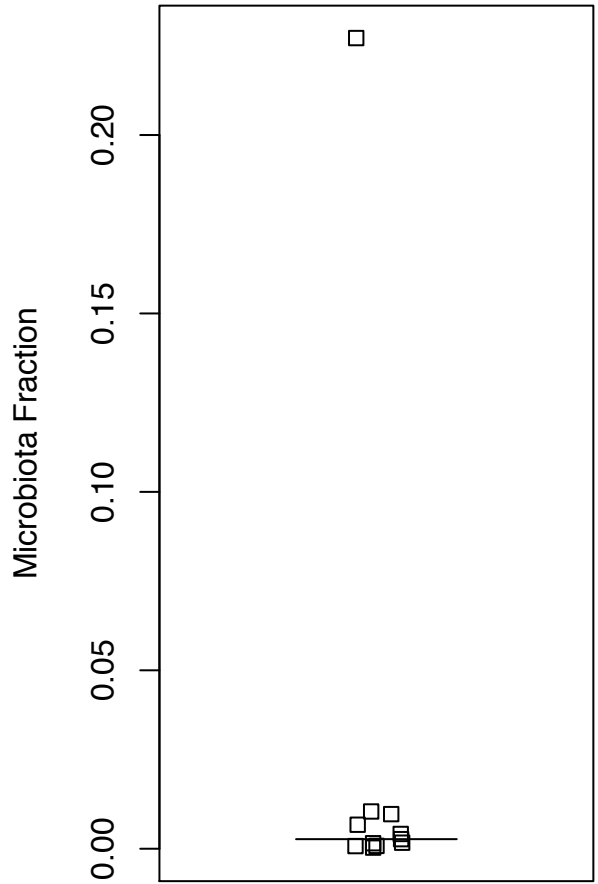

OTU\_17\_Aerococcus\_urinae

p-value: 0.95143

**non-dry**

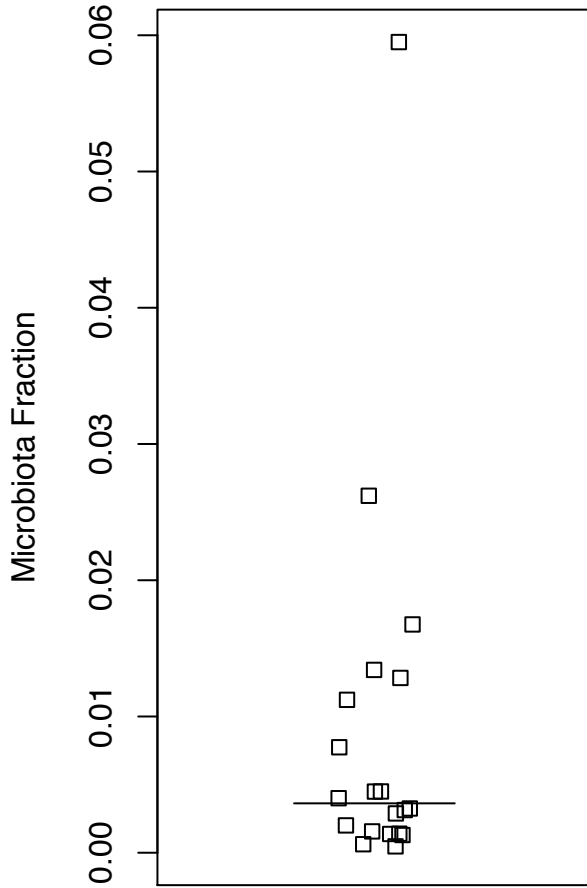

**dry**

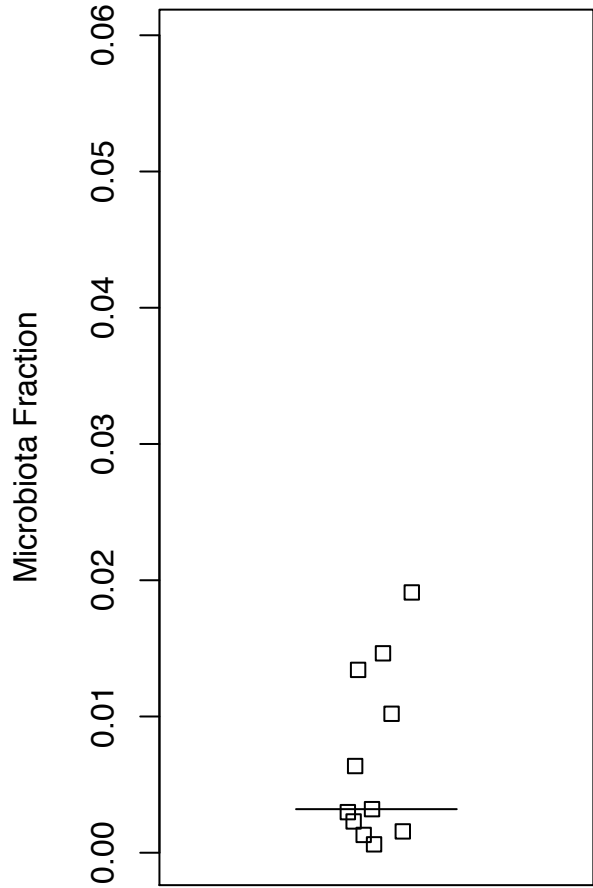

OTU\_18\_Atopobium\_rimae

p-value: 0.69946

non-dry

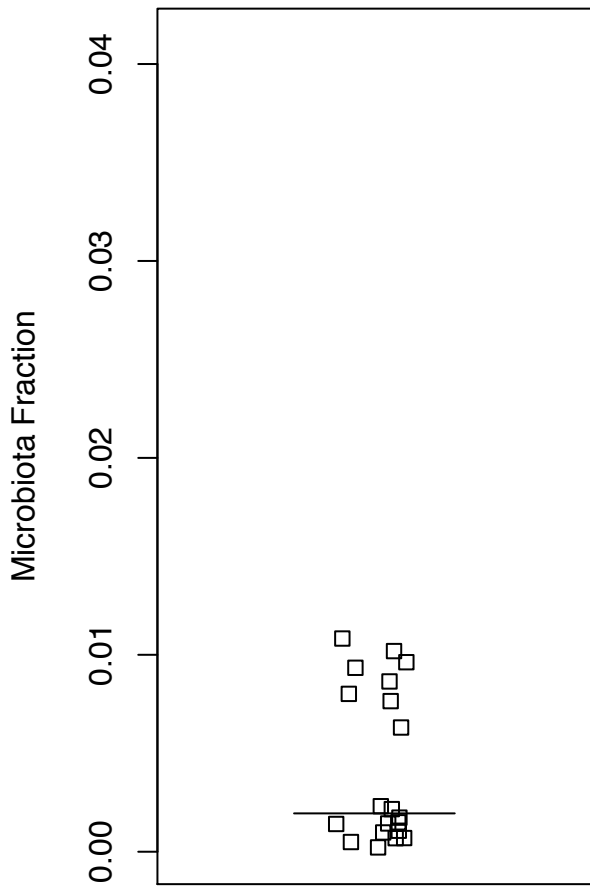

dry

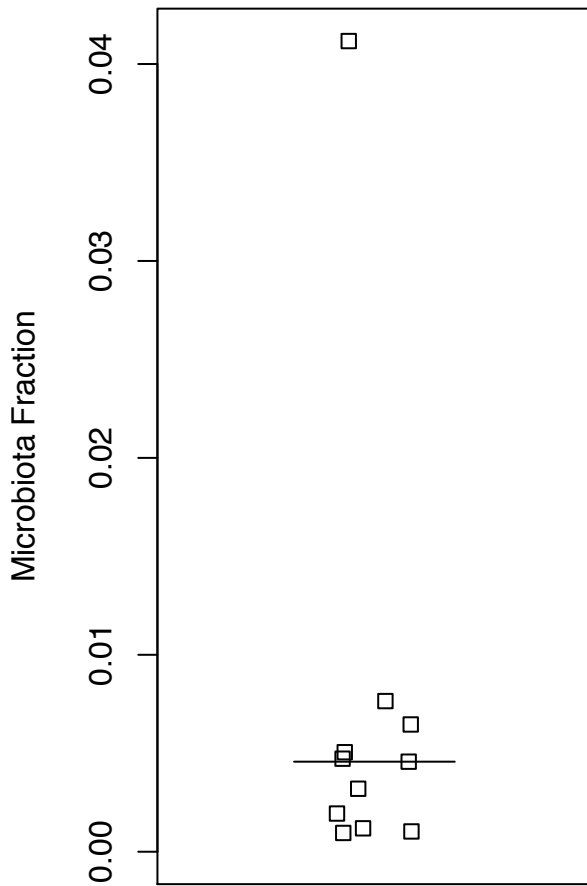





OTU\_21\_Prevotella\_amnii

p-value: 0.88506

non-dry

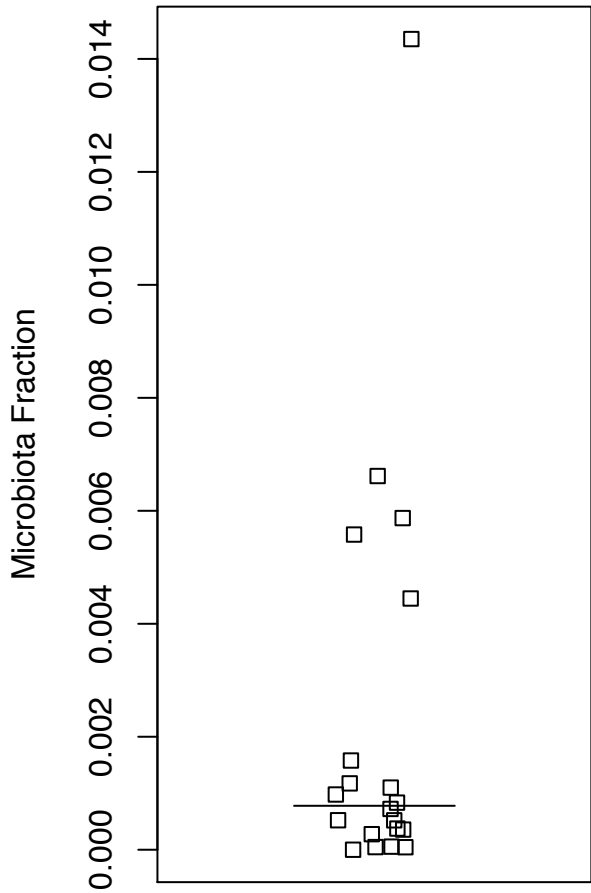

dry

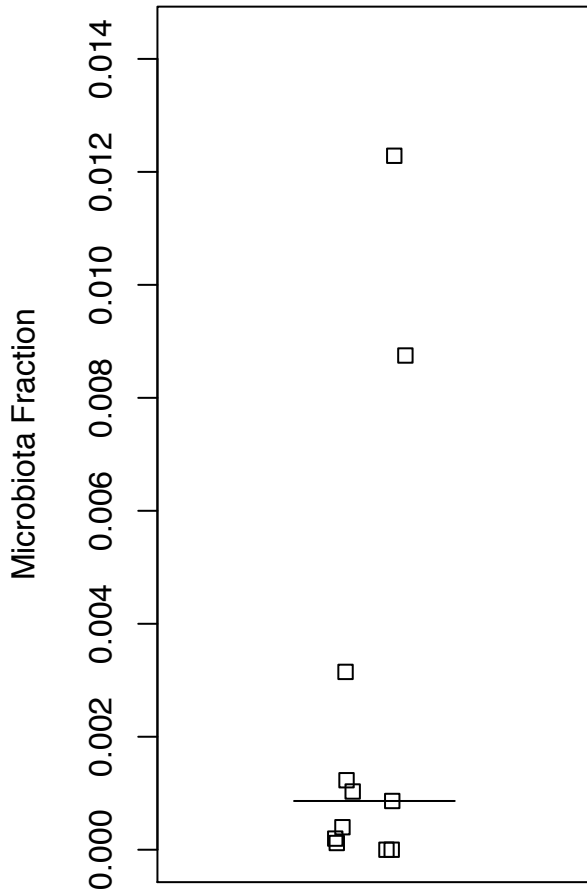











OTU\_26\_Prevotella\_disiens

p-value: 0.0595

non-dry

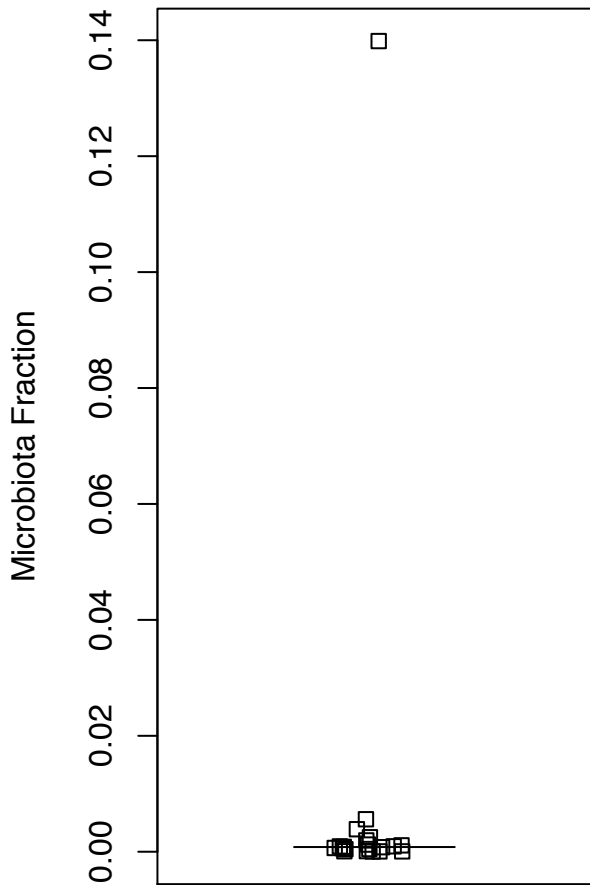

dry

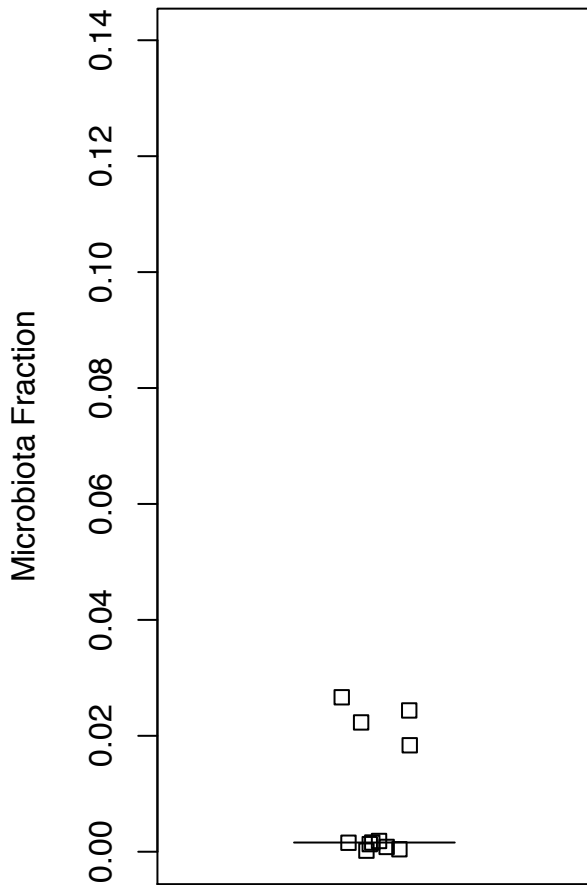



OTU\_28\_Dialister\_micr.o.aerophilus  
p-value: 0.52821

**non-dry**

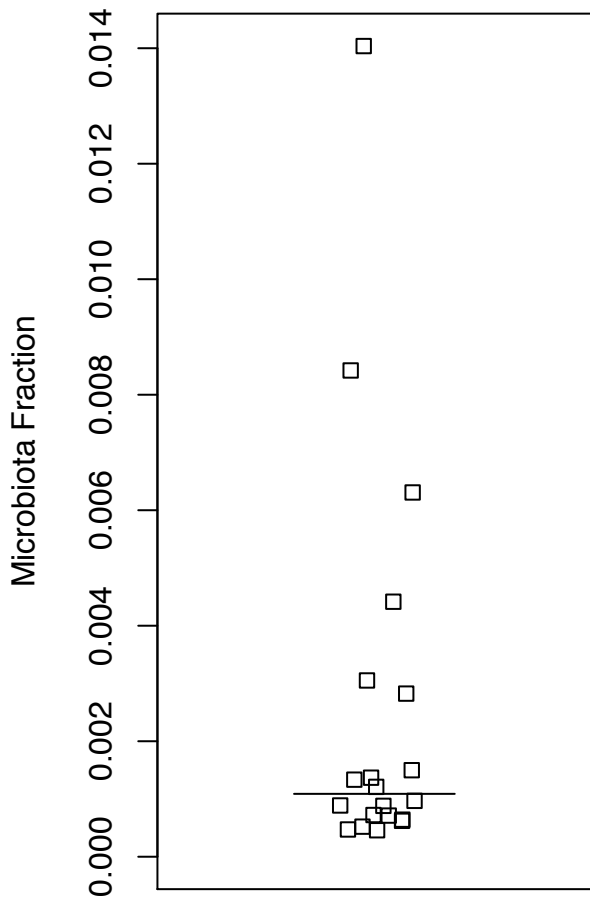

**dry**

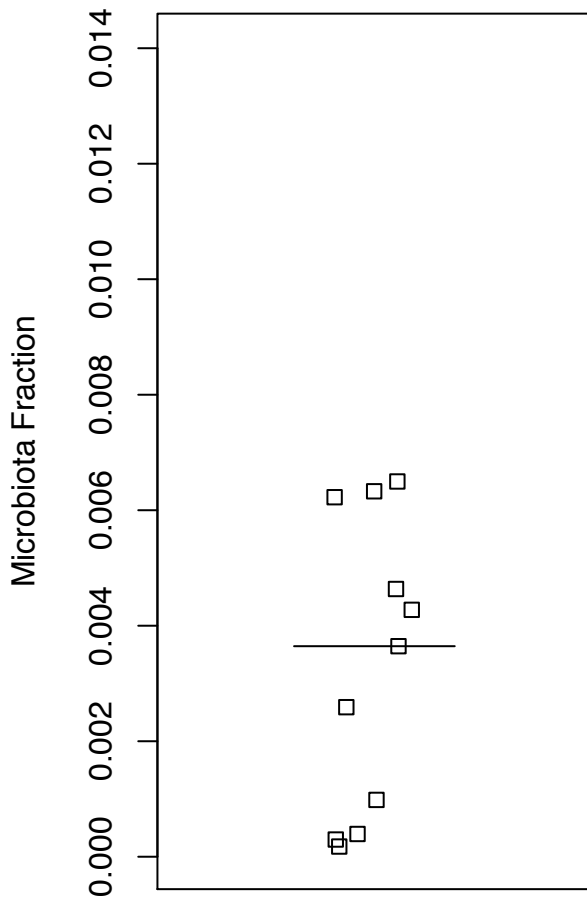









OTU\_32\_Lactobacillus\_rhamnosus.casei

p-value: 0.85136

non-dry

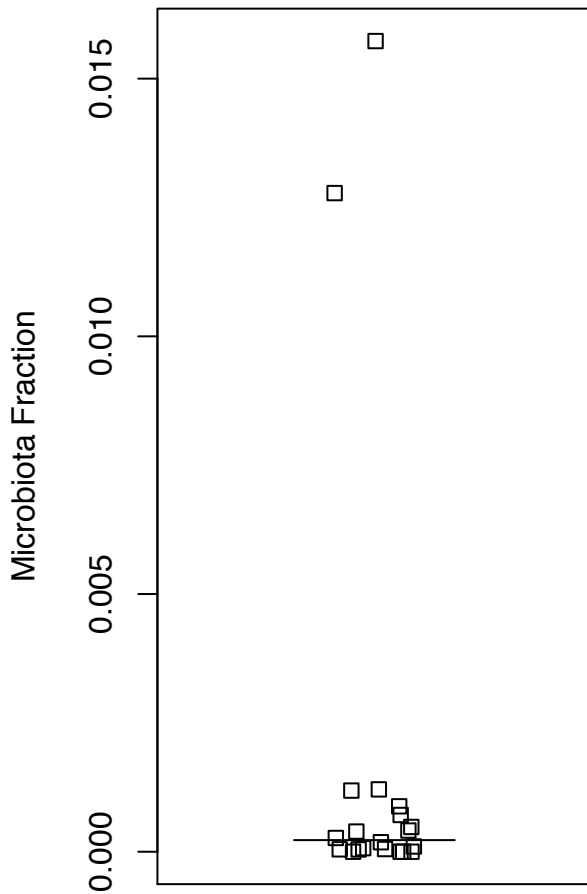







OTU\_36\_Staphylococcus

p-value: 0.069

non-dry

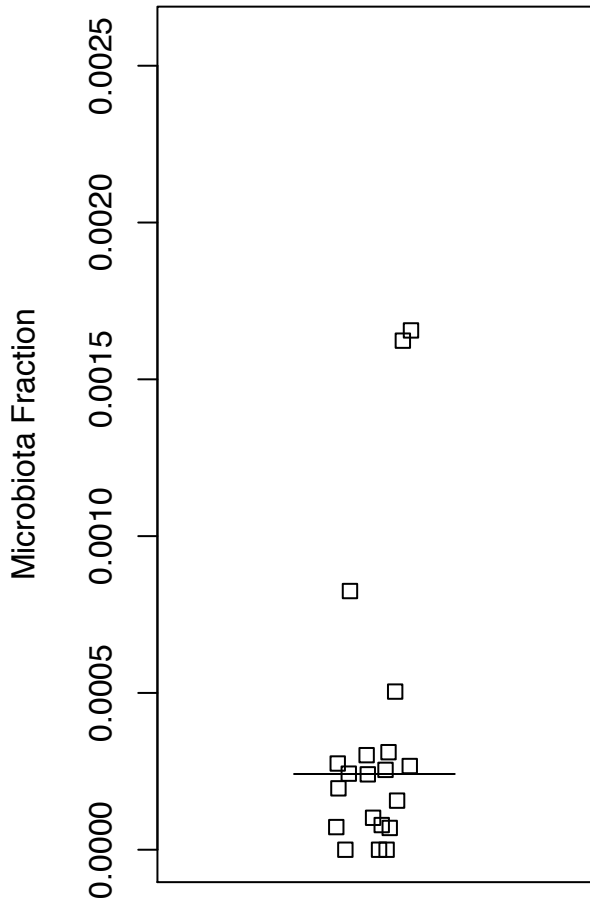

dry

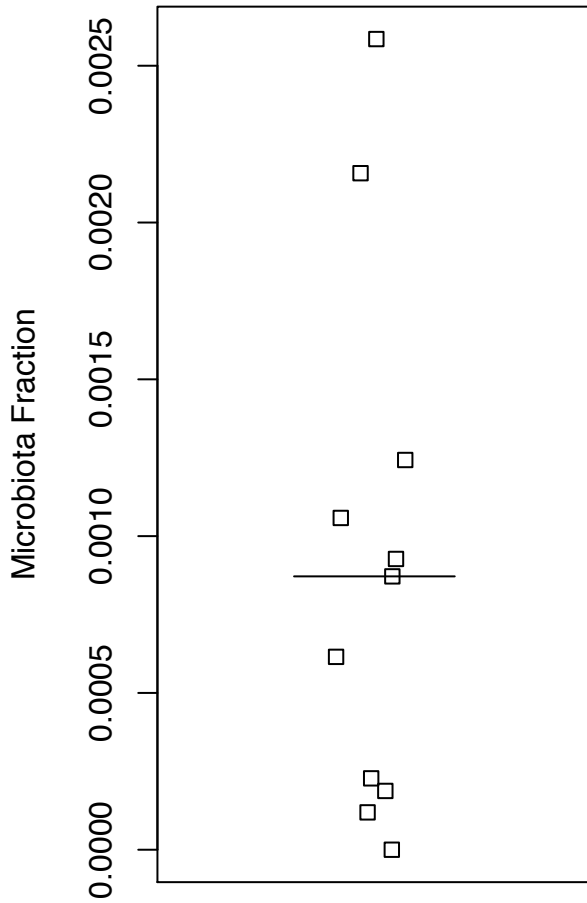



OTU\_38\_Finegoldia\_magna

p-value: 0.00626

non-dry

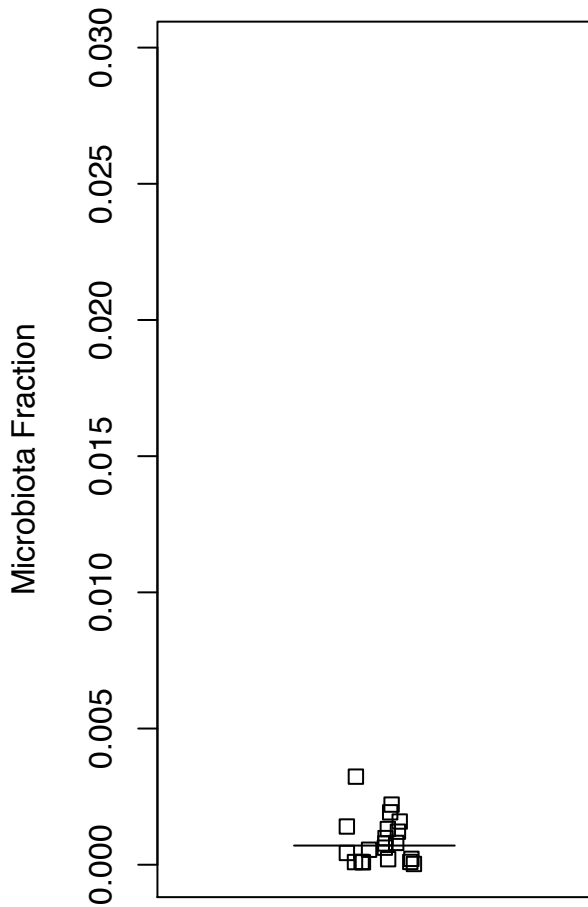

dry

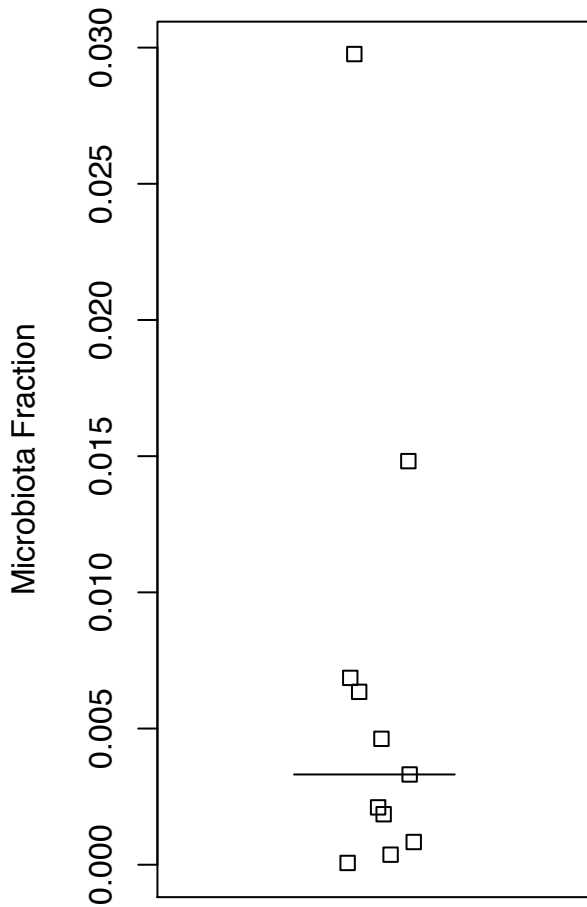

OTU\_39\_Peptostreptococcus

p-value: 0.0243

non-dry

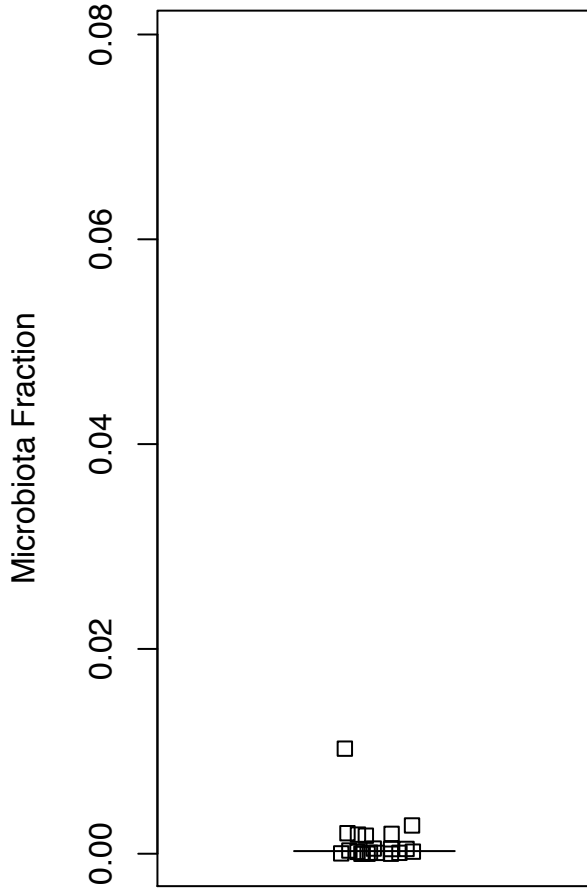

dry

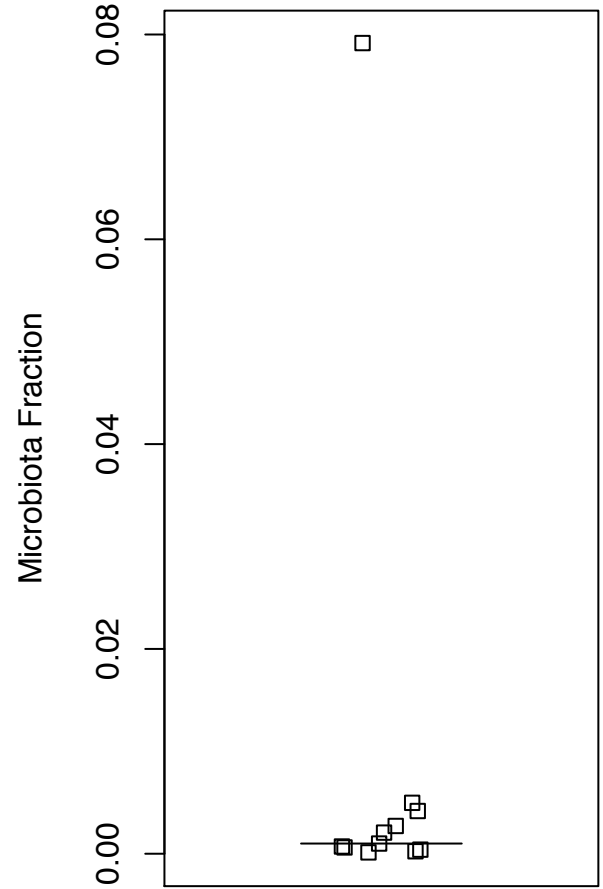





OTU\_41\_Varibaculum  
p-value: 0.01178

non-dry

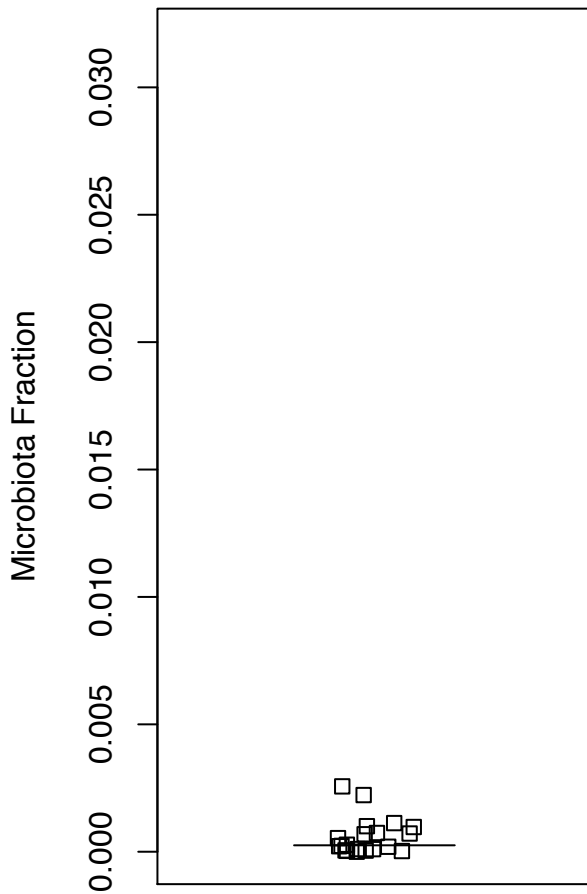

dry

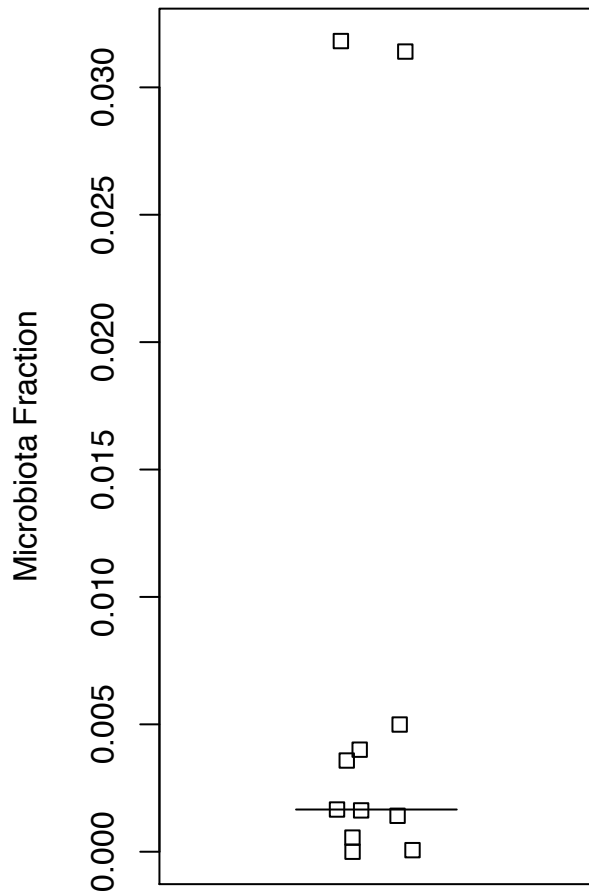

OTU\_42\_Parvimonas\_micra

p-value: 0.17962

**non-dry**

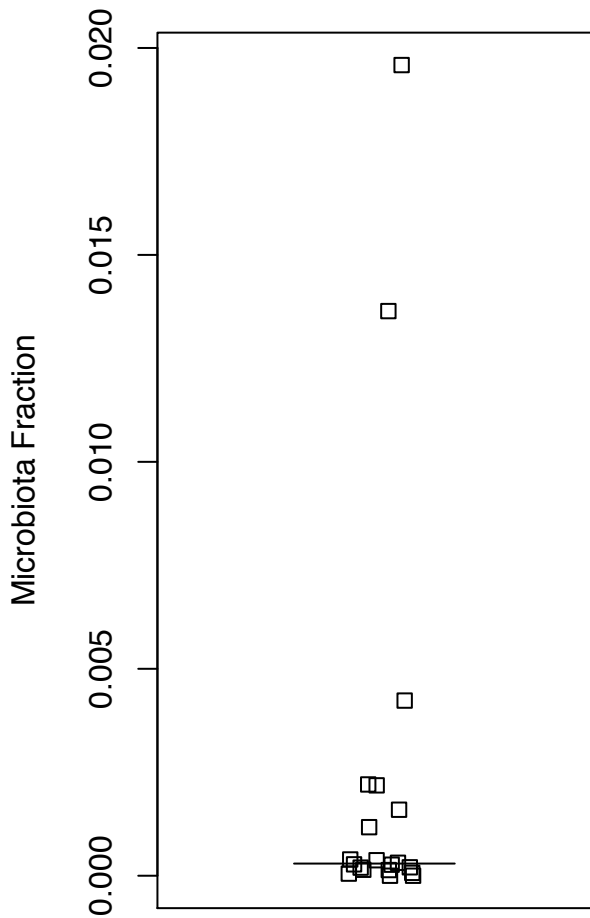

**dry**

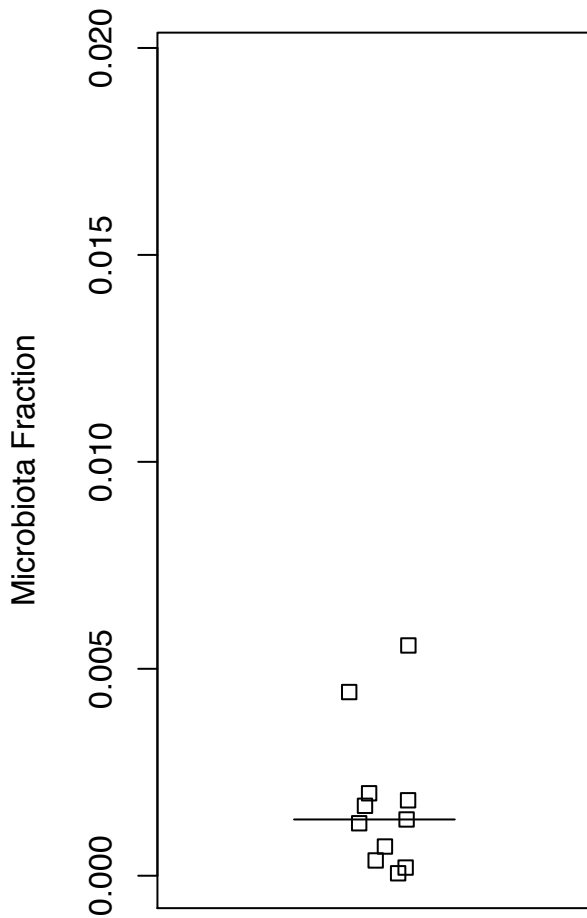





OTU\_45  
p-value: 0.85255

non-dry

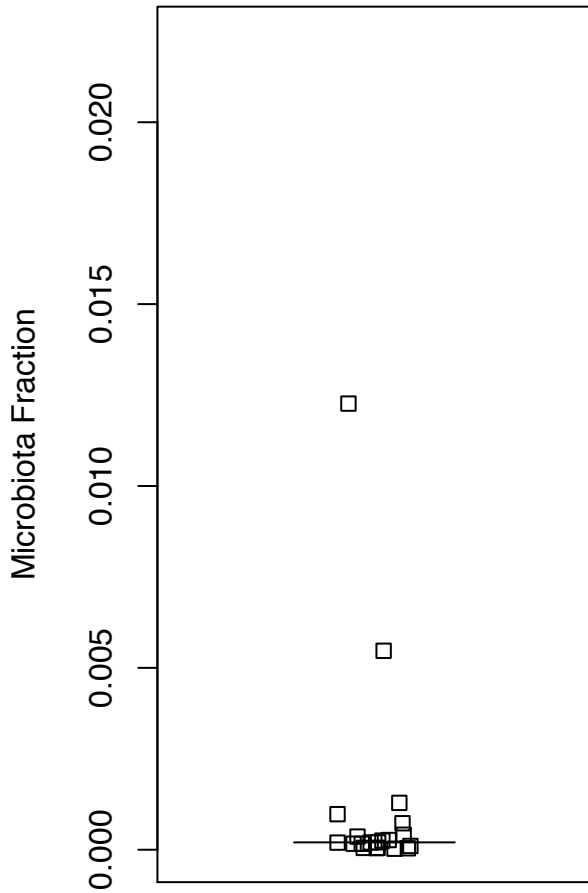

dry

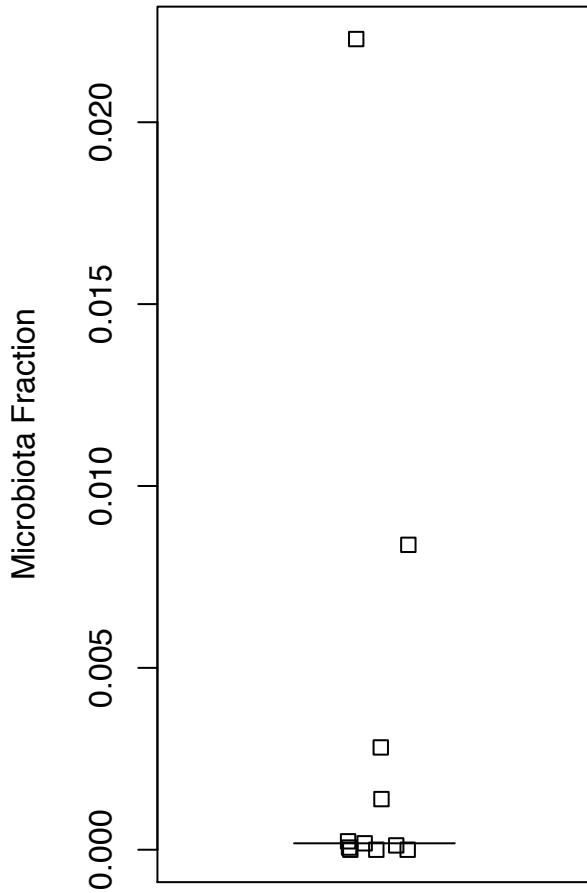







OTU\_48  
p-value: 0.72982

non-dry

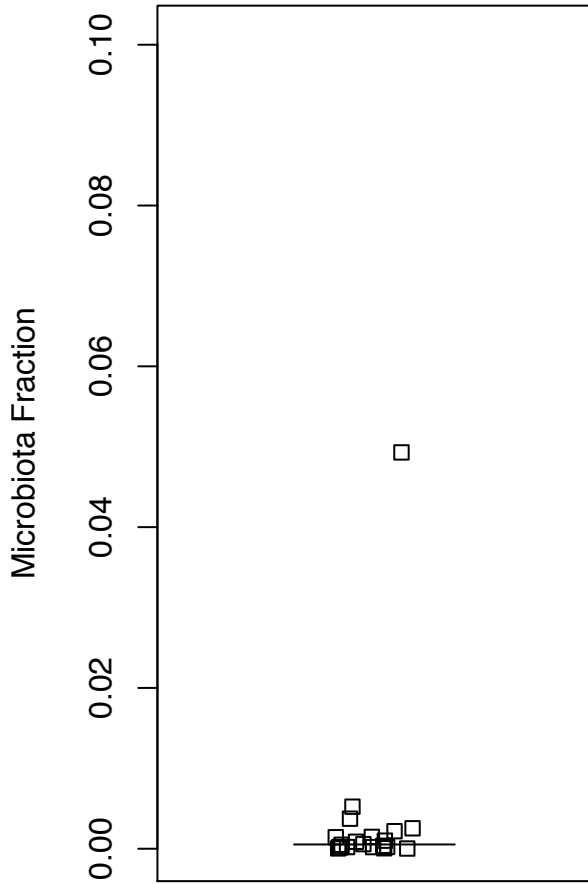

dry

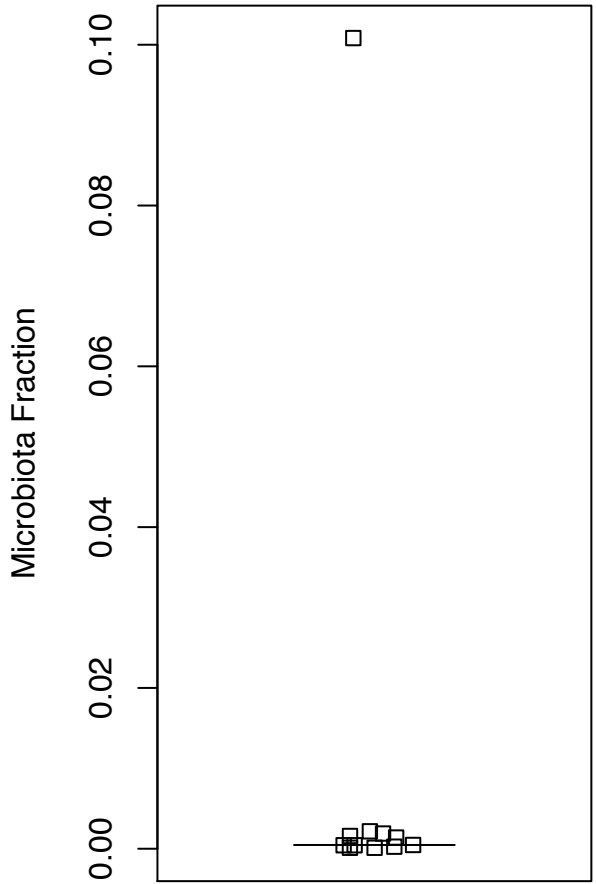



OTU\_50  
p-value: 0.08183

non-dry

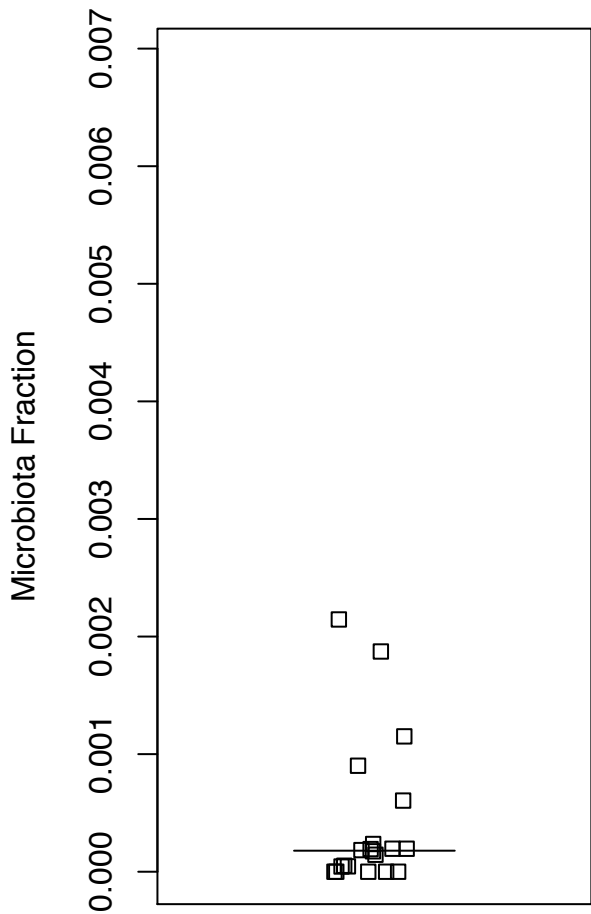

dry

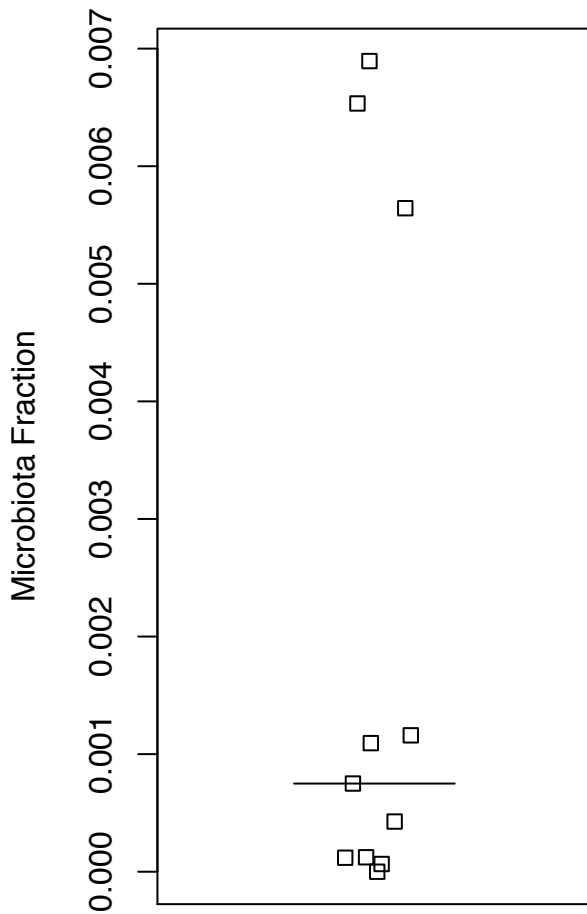

OTU\_51  
p-value: 0.2976

**non-dry**

**dry**

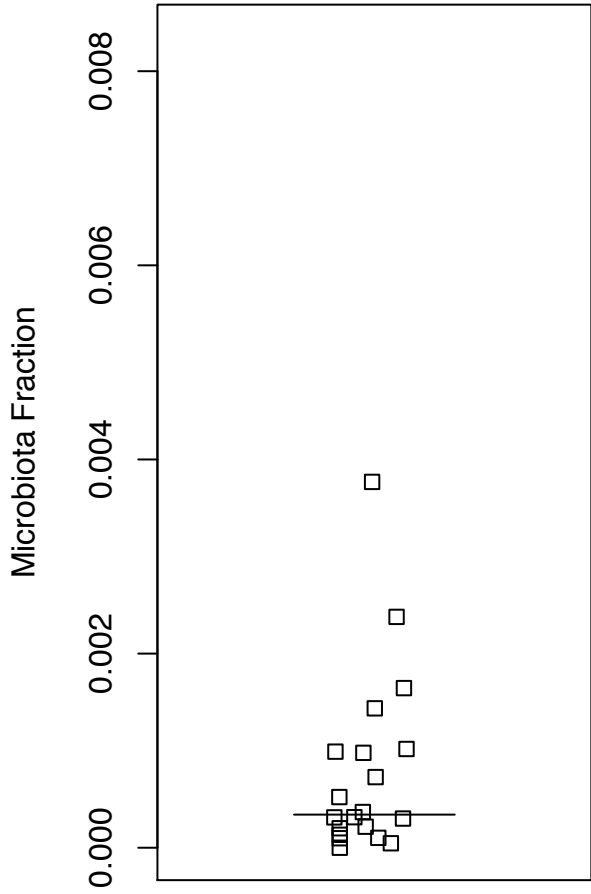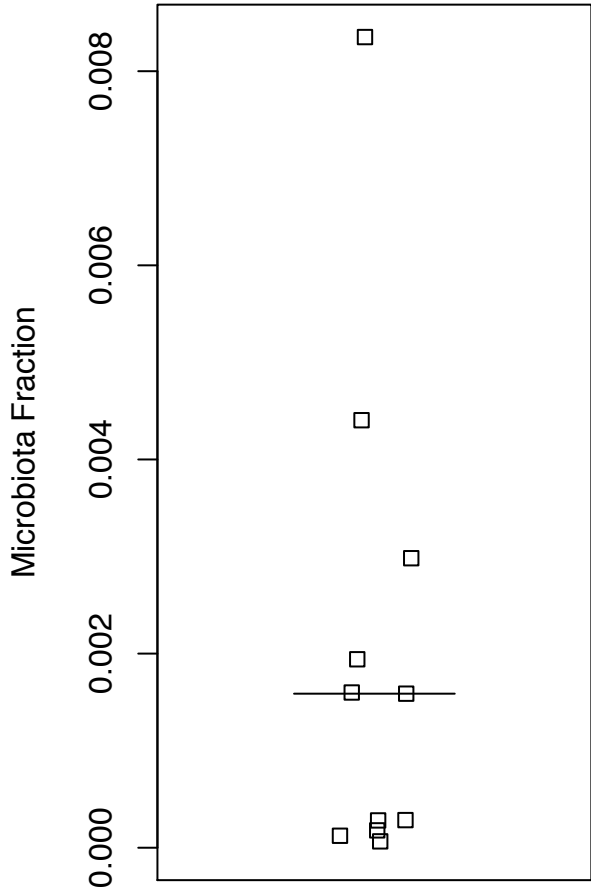

OTU\_52  
p-value: 0.11325

**non-dry**

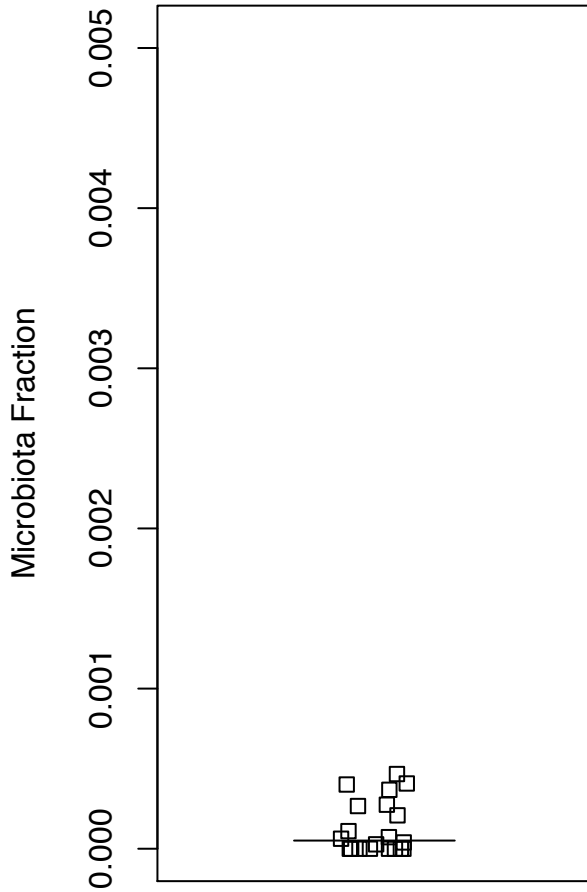

**dry**

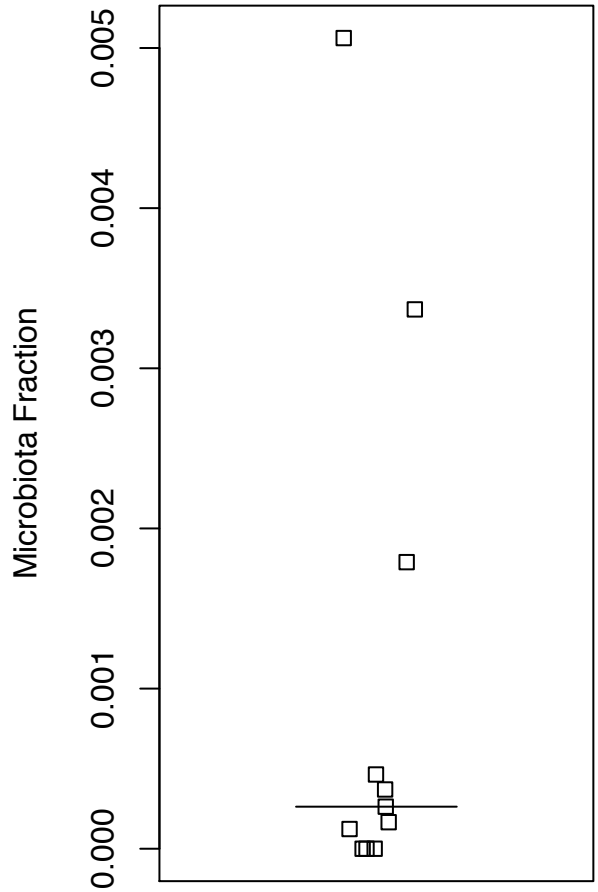





OTU\_55  
p-value: 0.70993

non-dry

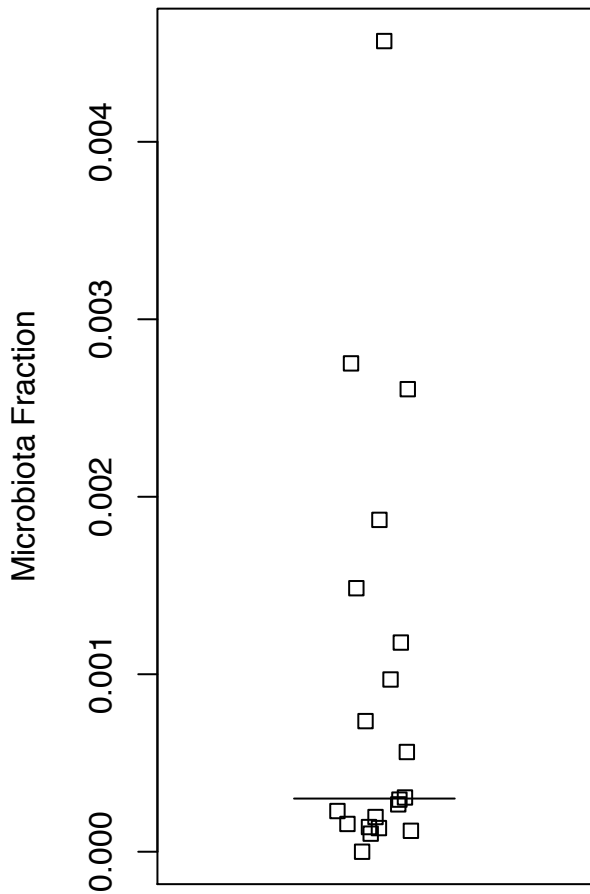

dry

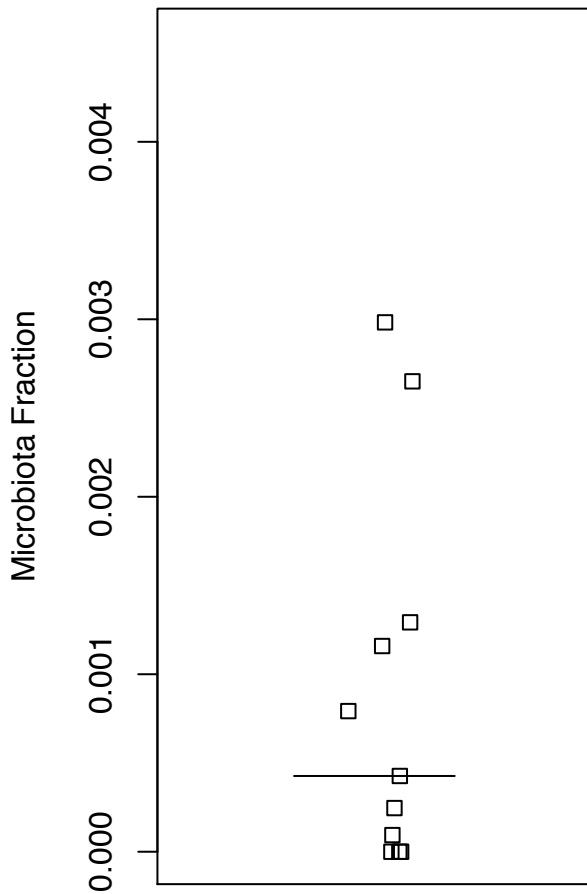





OTU\_57\_Clostridiales\_BVAB3

p-value: 0.37376

non-dry

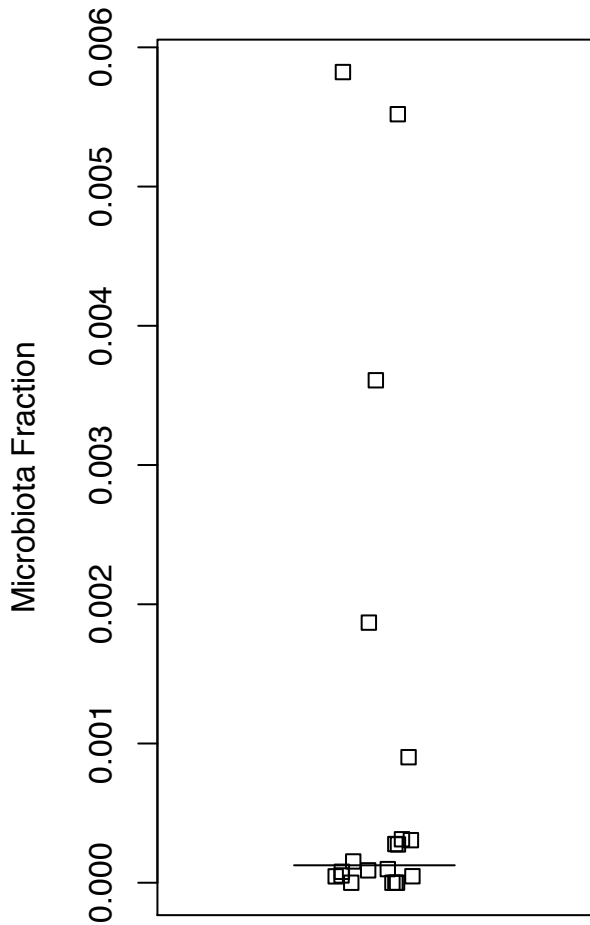

dry

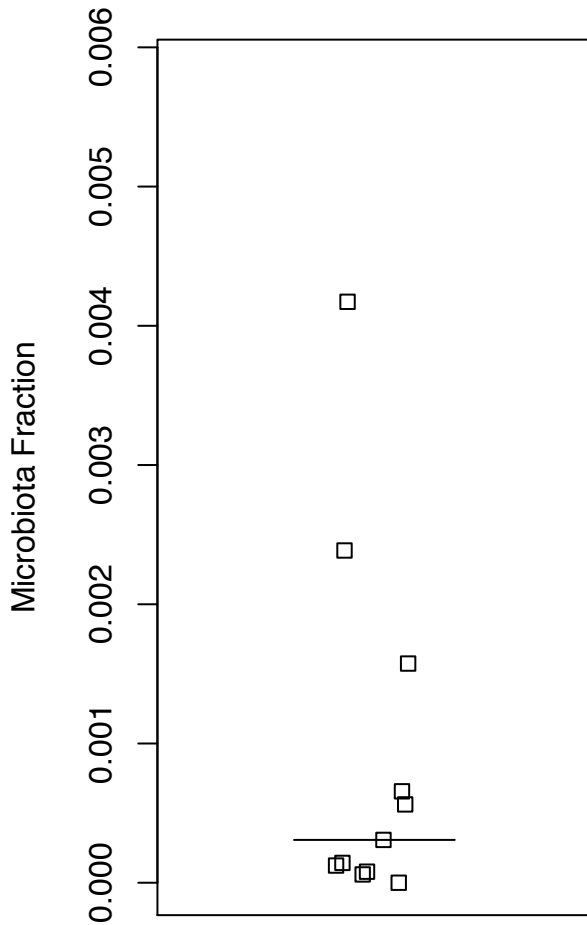







OTU\_61\_Mobiluncus\_curtisii

p-value: 0.00136

non-dry

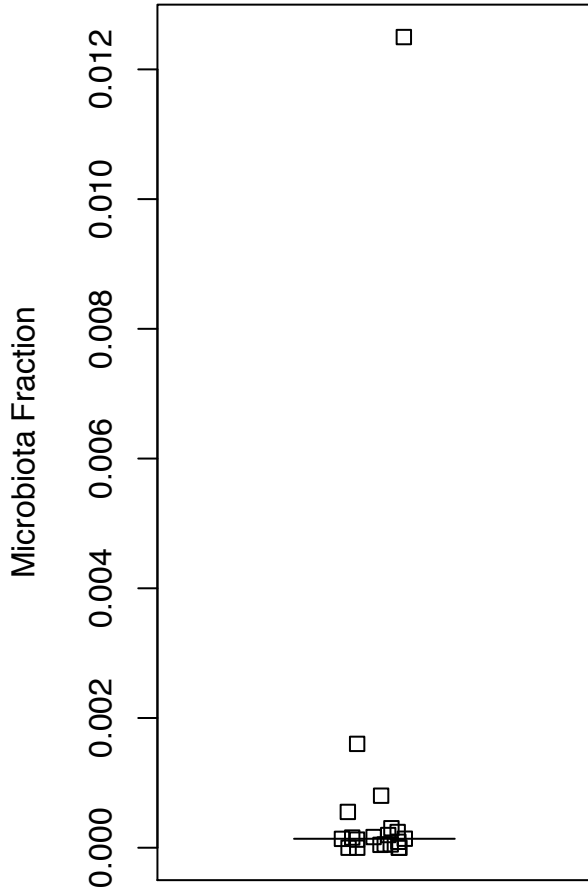

dry

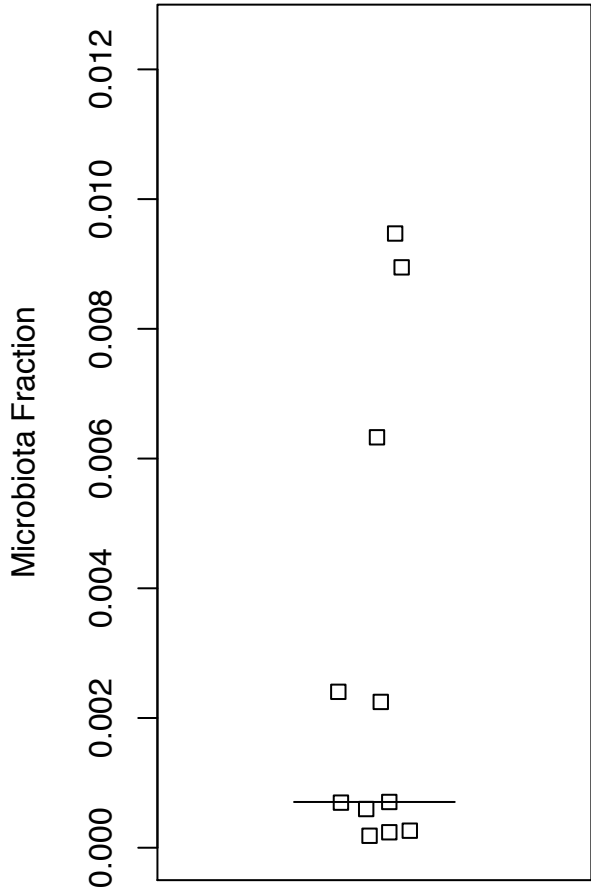

OTU\_62  
p-value: 0.03396

non-dry

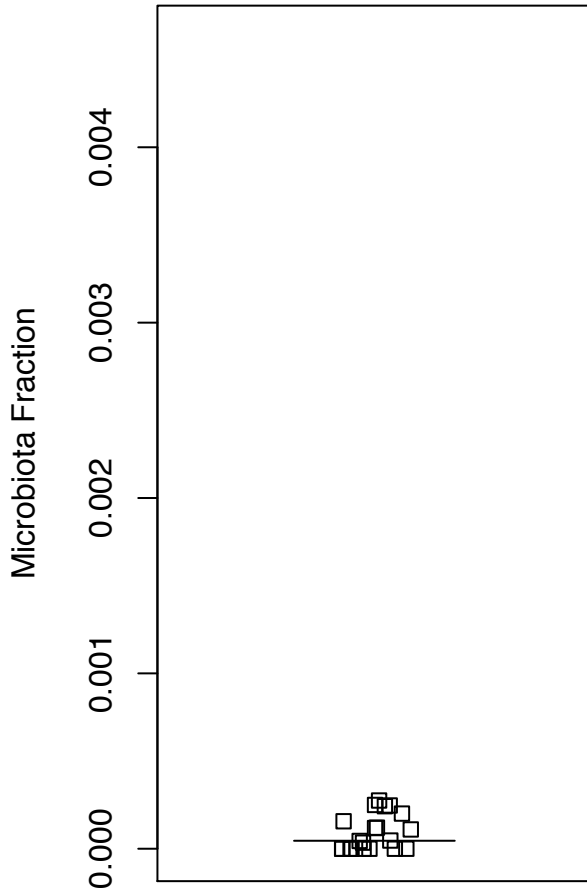

dry

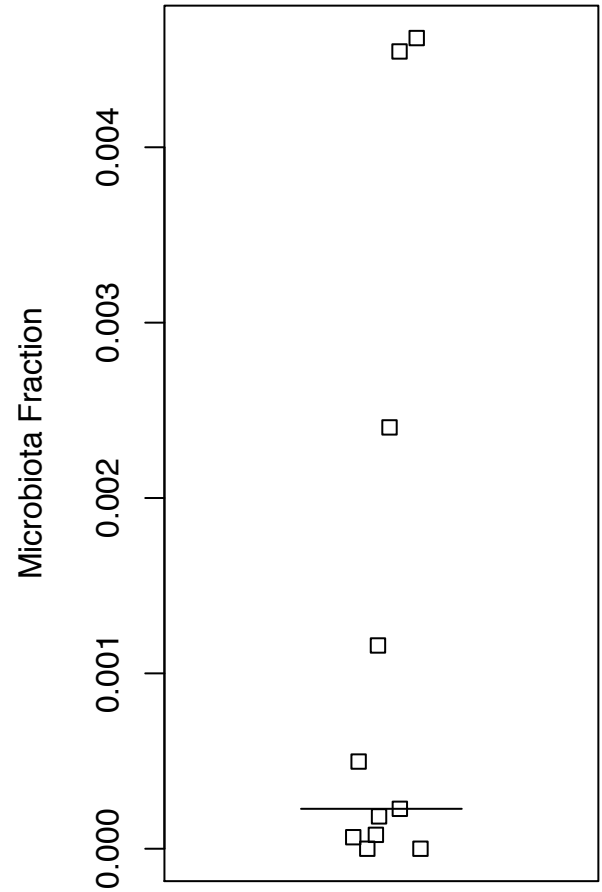





OTU\_64  
p-value: 0.27409

non-dry

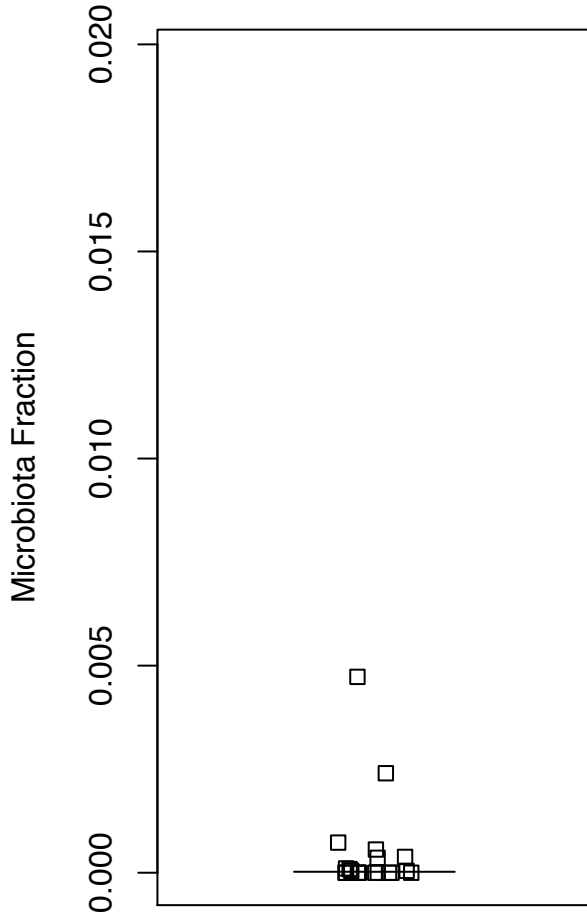

dry

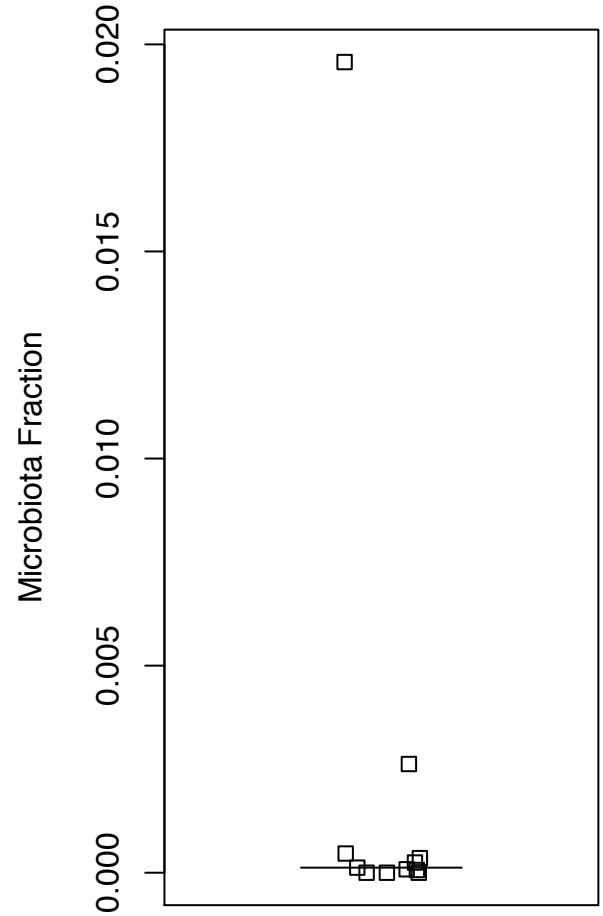

OTU\_65\_Veillonella\_montpellierensis

p-value: 0.9175

non-dry

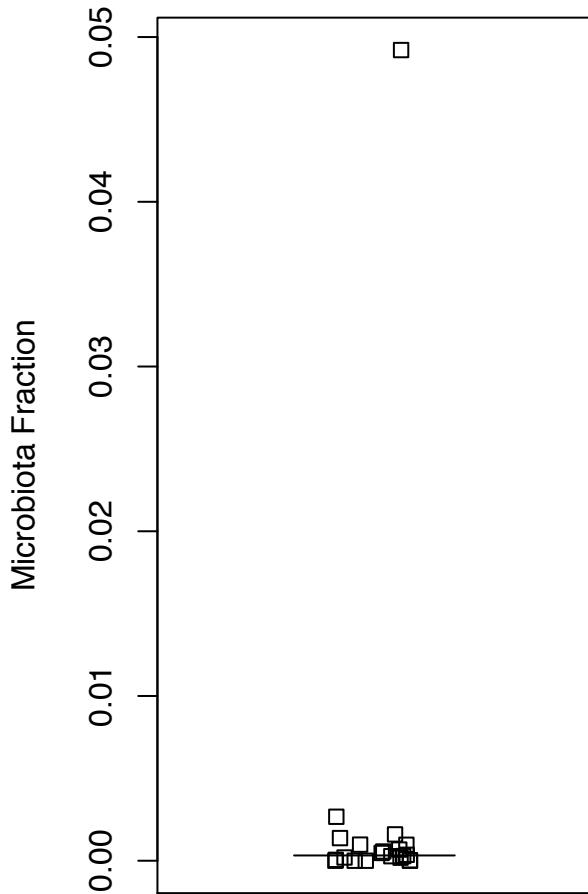

dry

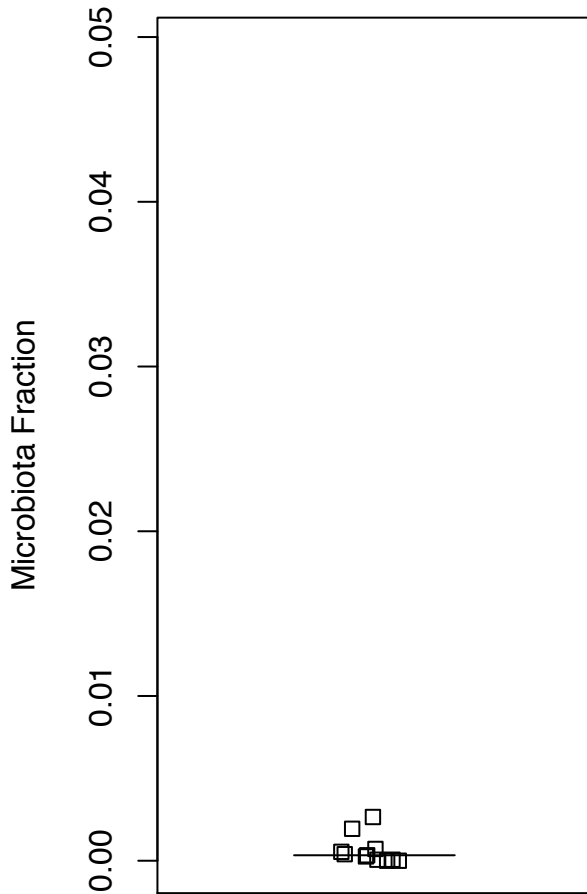



OTU\_67  
p-value: 0.14048

**non-dry**

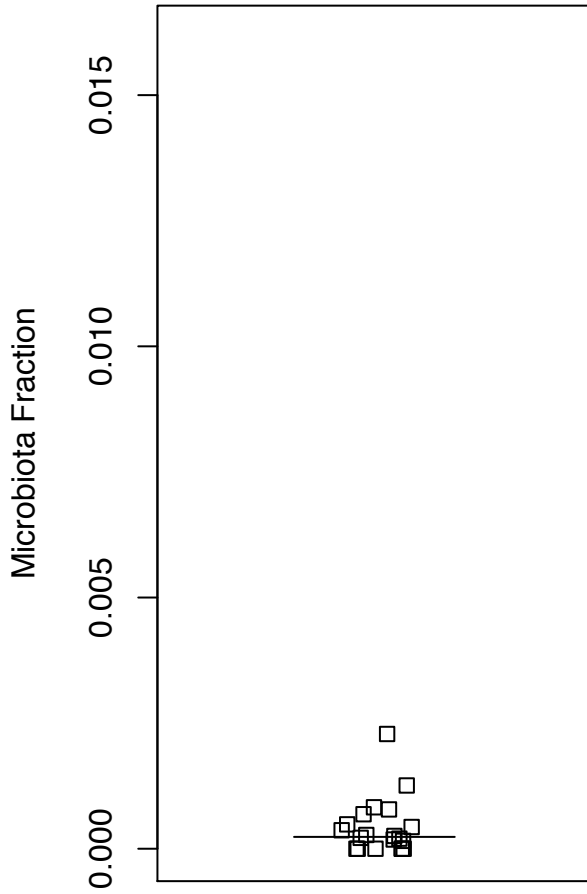

**dry**

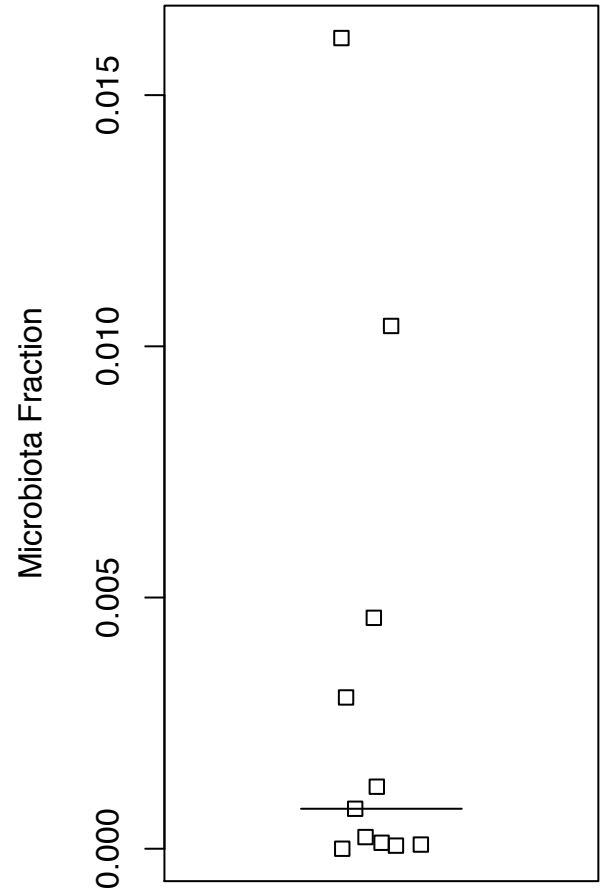





OTU\_70  
p-value: 0.38066

non-dry

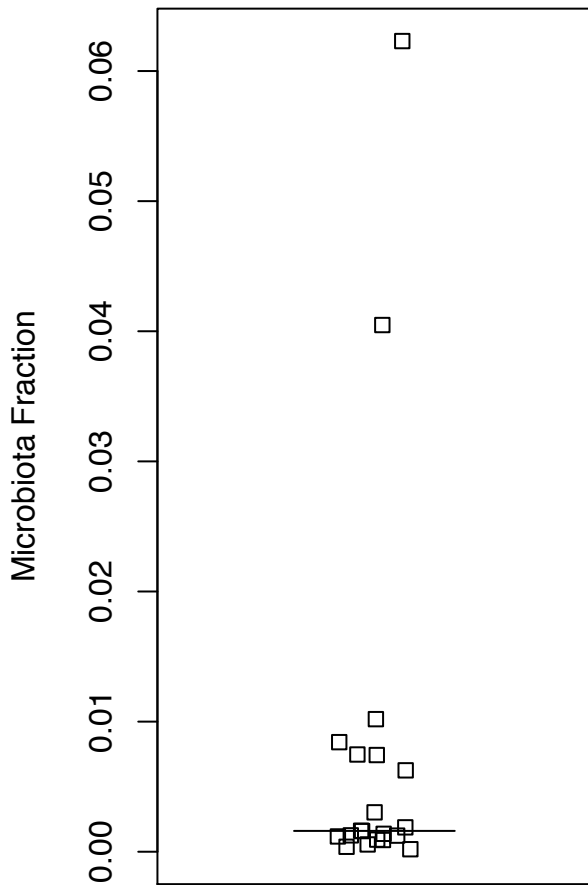

dry

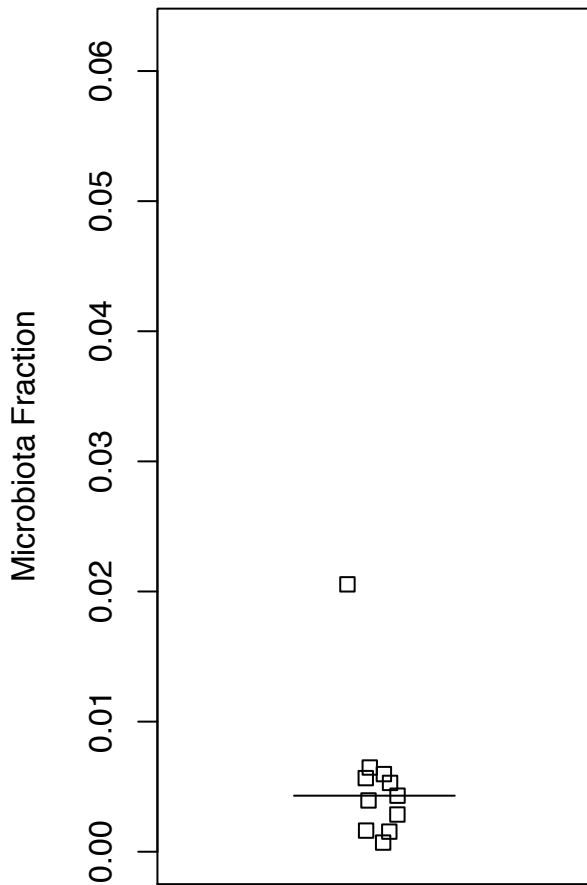





OTU\_72  
p-value: 0.63204

**non-dry**

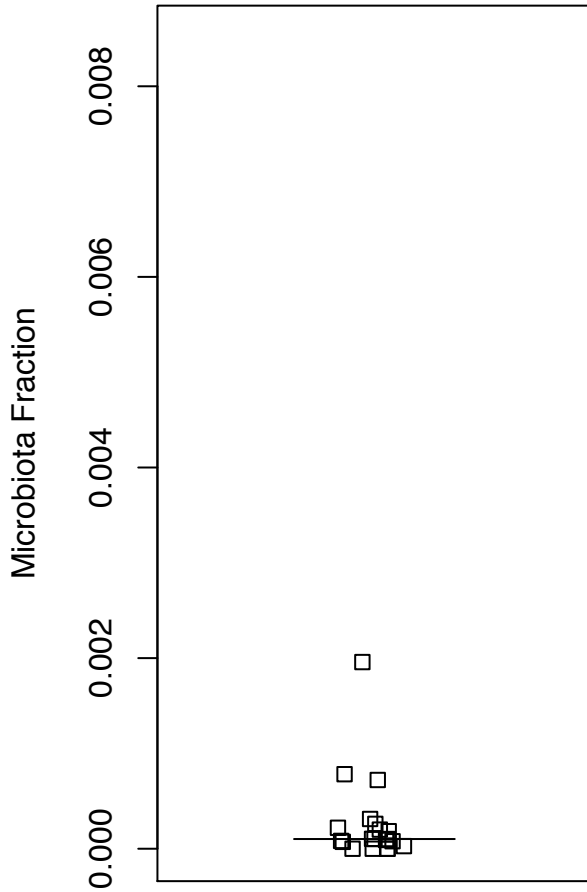

**dry**

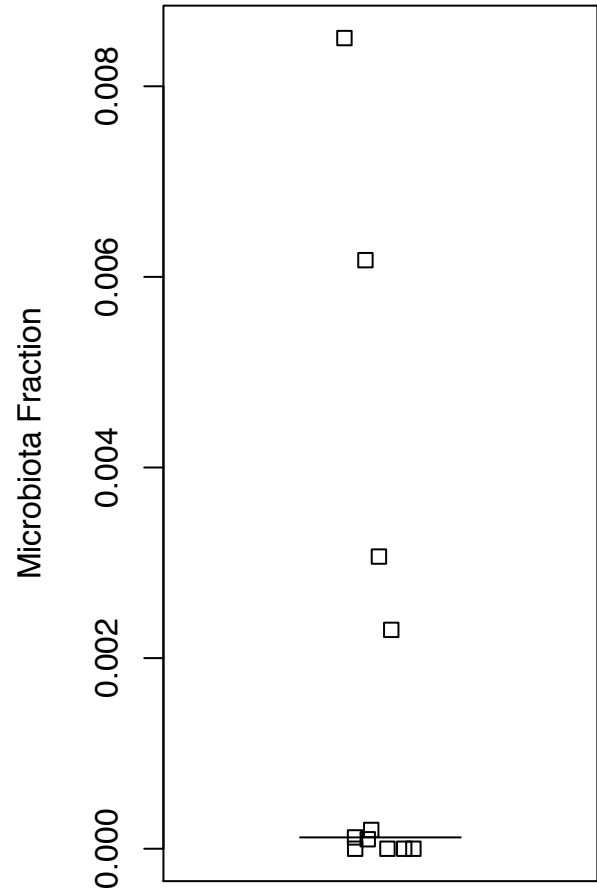





OTU\_75  
p-value: 0.0949

non-dry

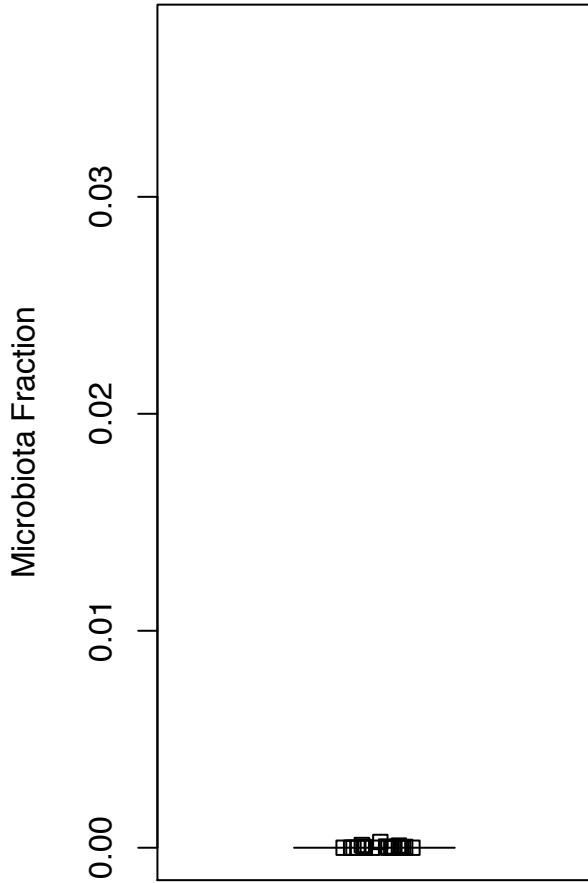

dry

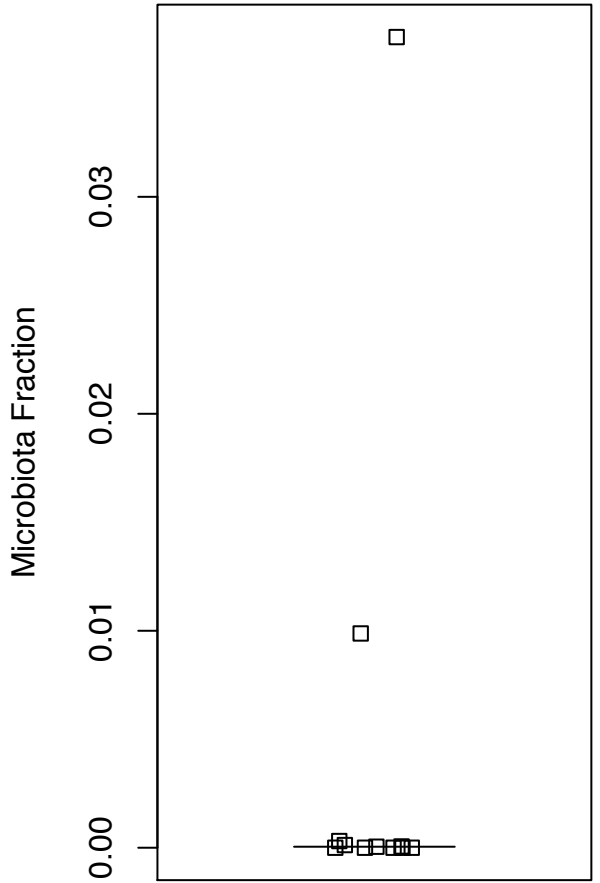





OTU\_81  
p-value: 0.42586

**non-dry**

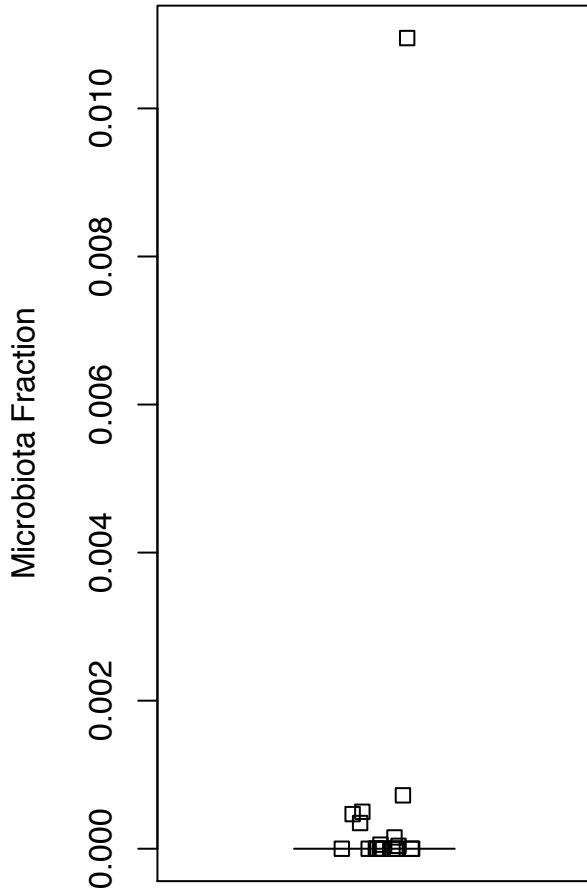

**dry**

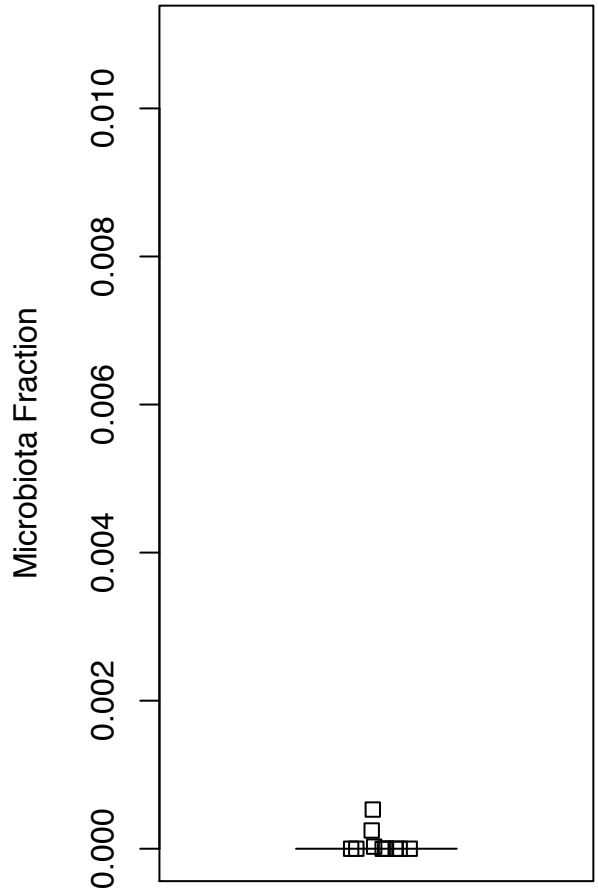

OTU\_82  
p-value: 0.47914

**non-dry**

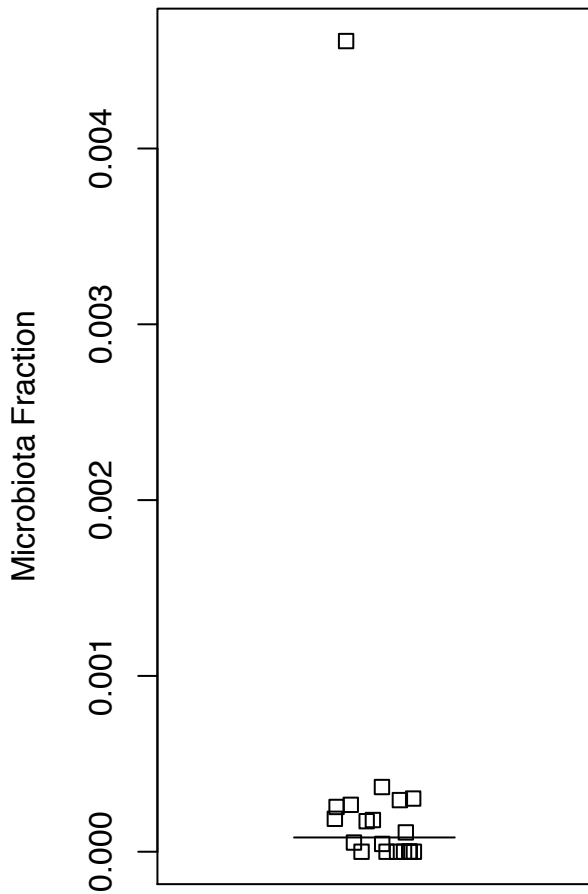

**dry**

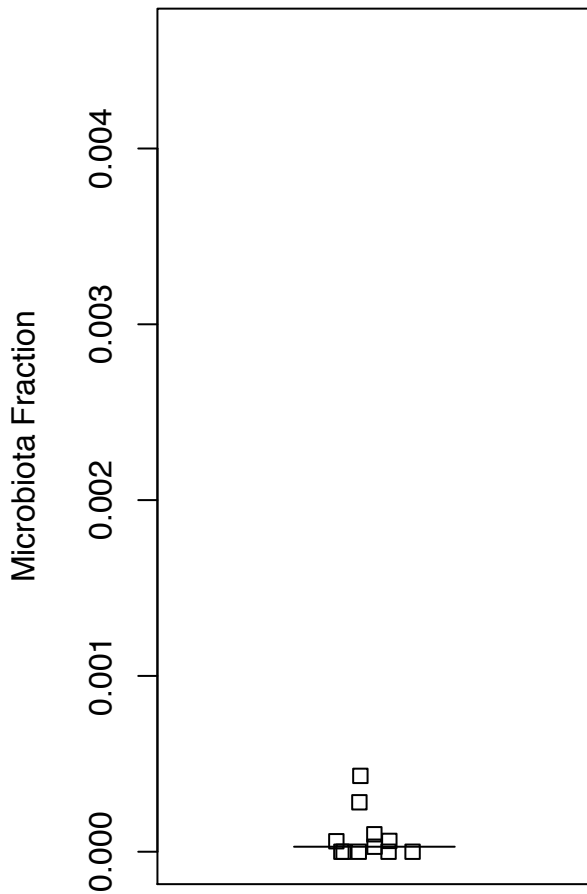



OTU\_83  
p-value: 0.64661

non-dry

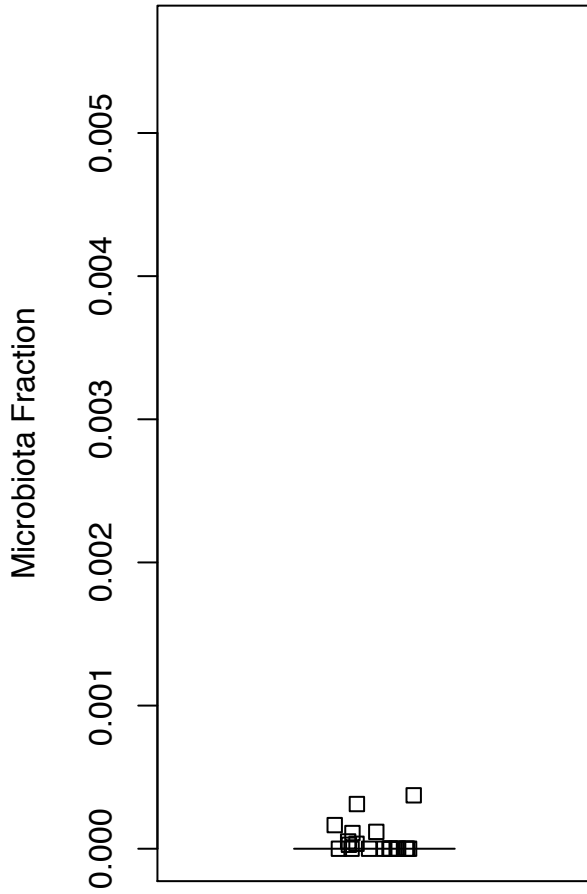

dry

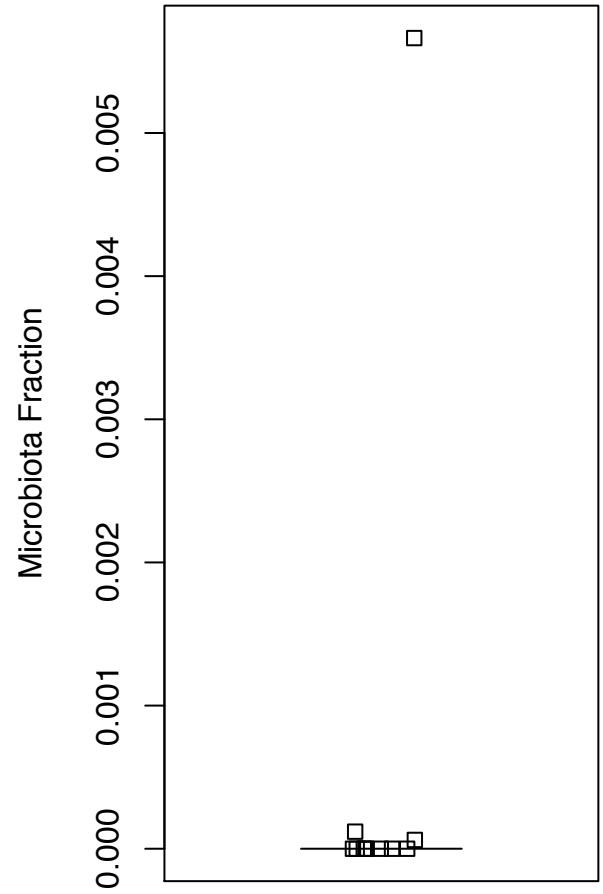

OTU\_84  
p-value: 0.14133

non-dry

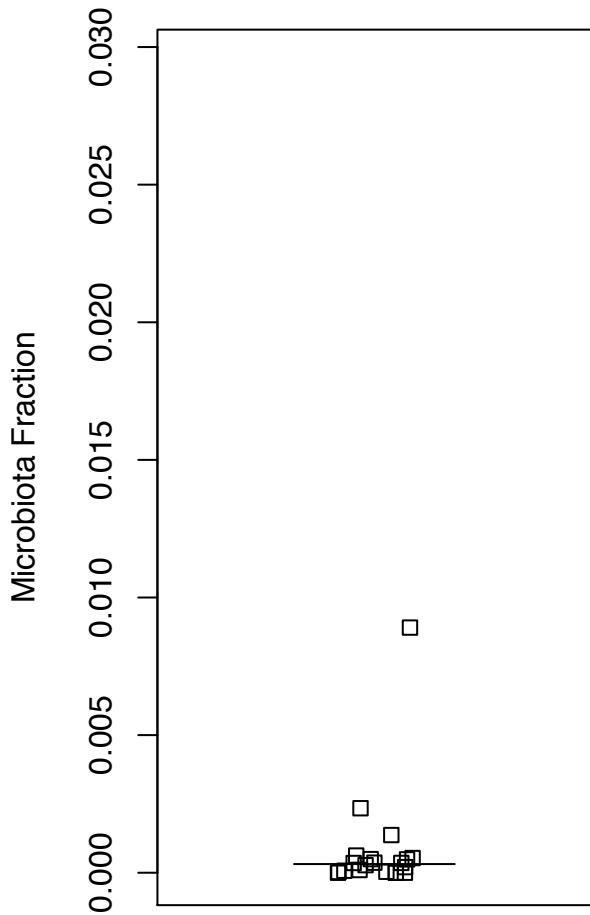

dry

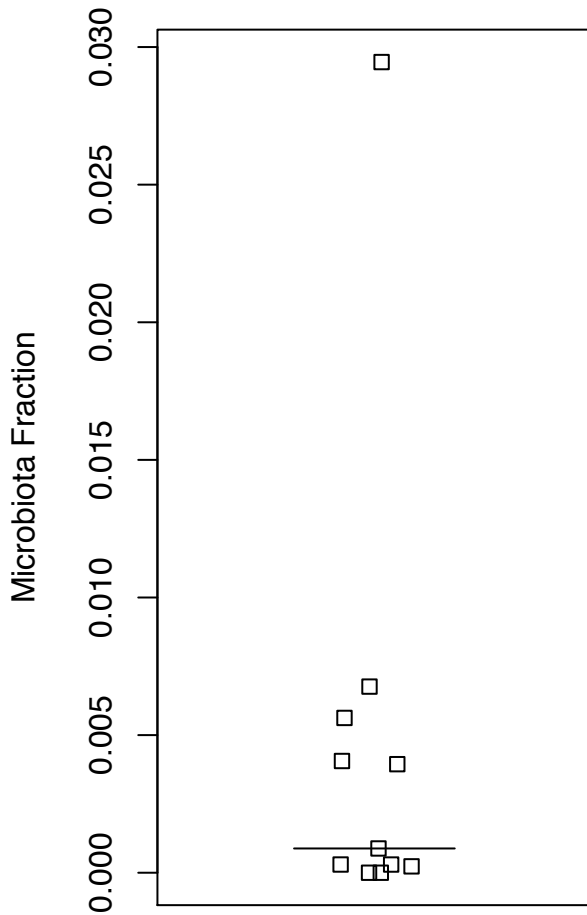

OTU\_85  
p-value: 0.86491

non-dry

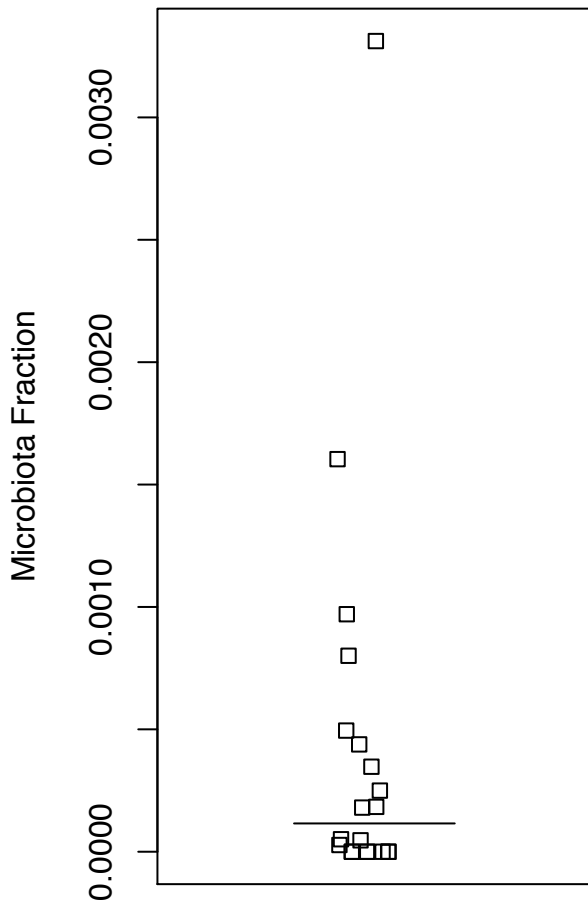

dry

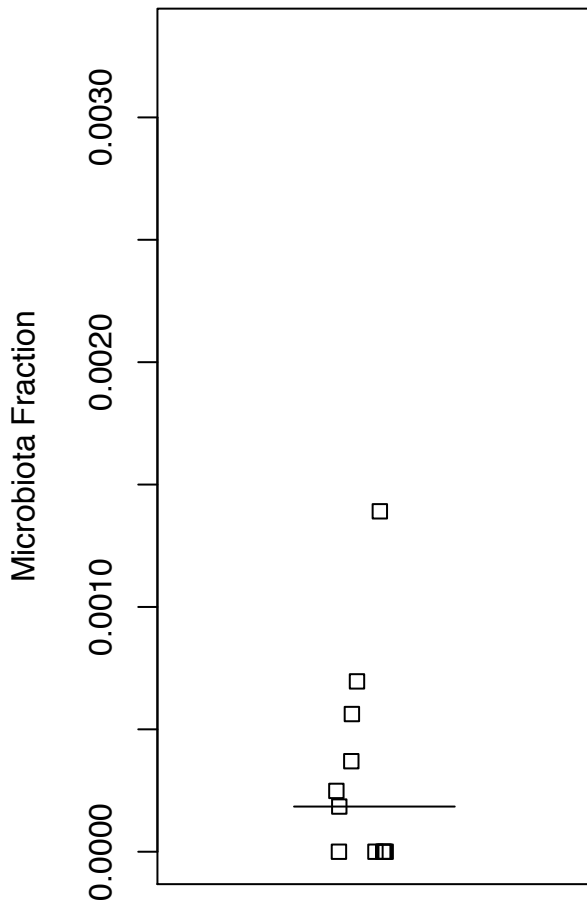

OTU\_87  
p-value: 0.05175

non-dry

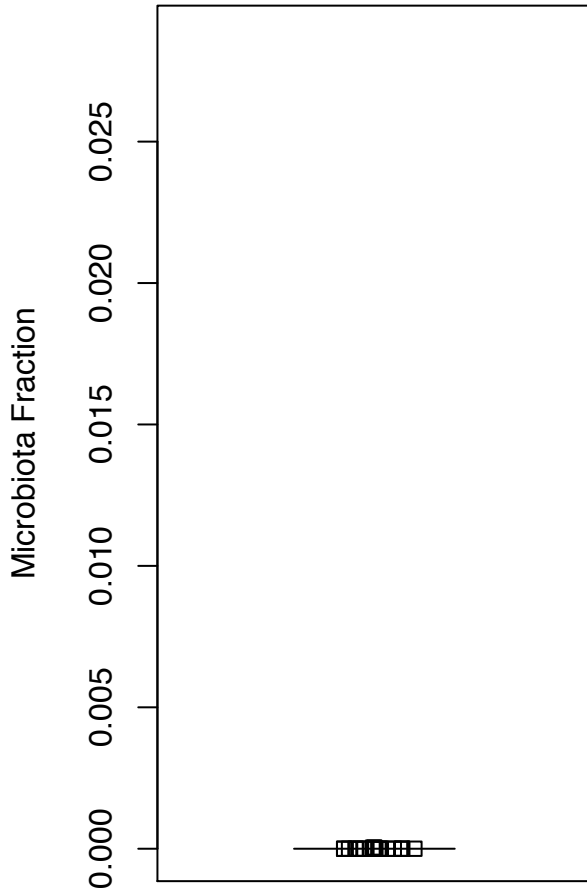

dry

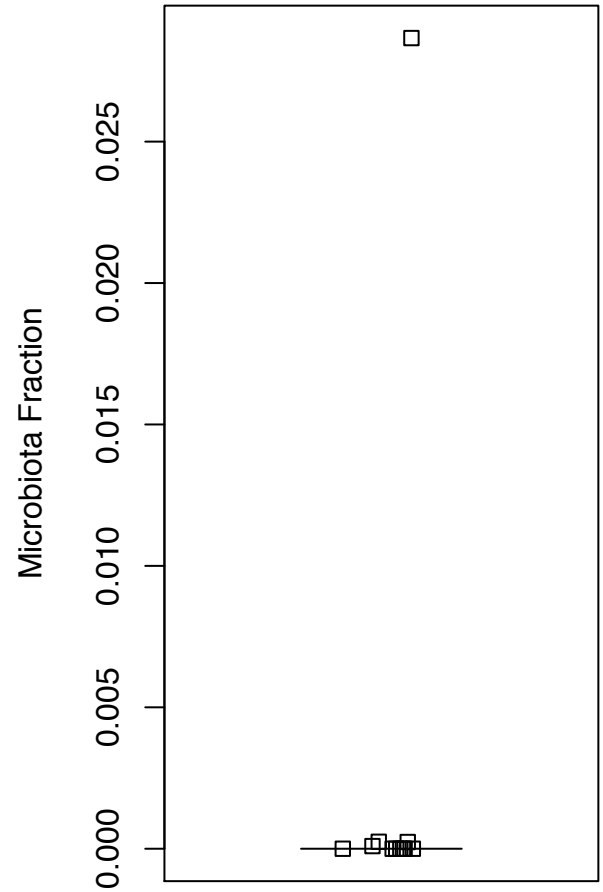

OTU\_89  
p-value: 0.28831

non-dry

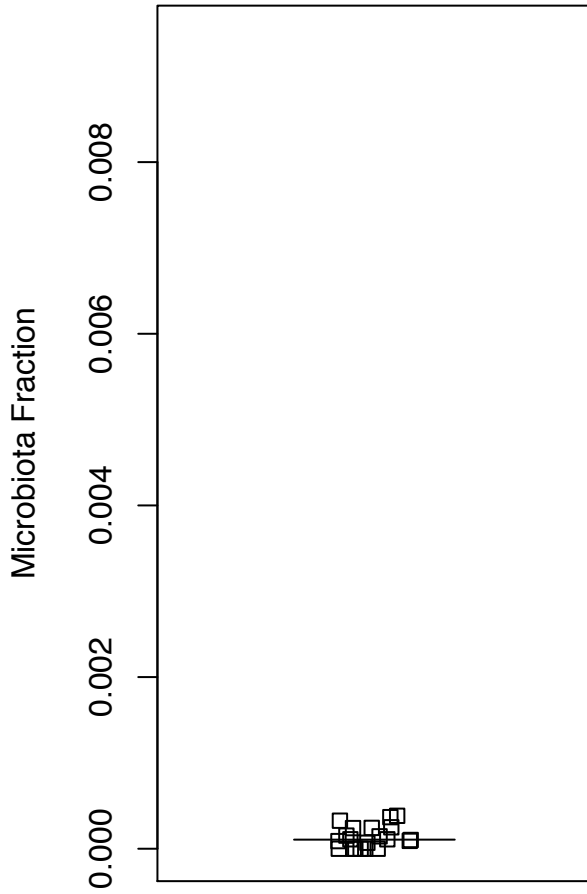

dry

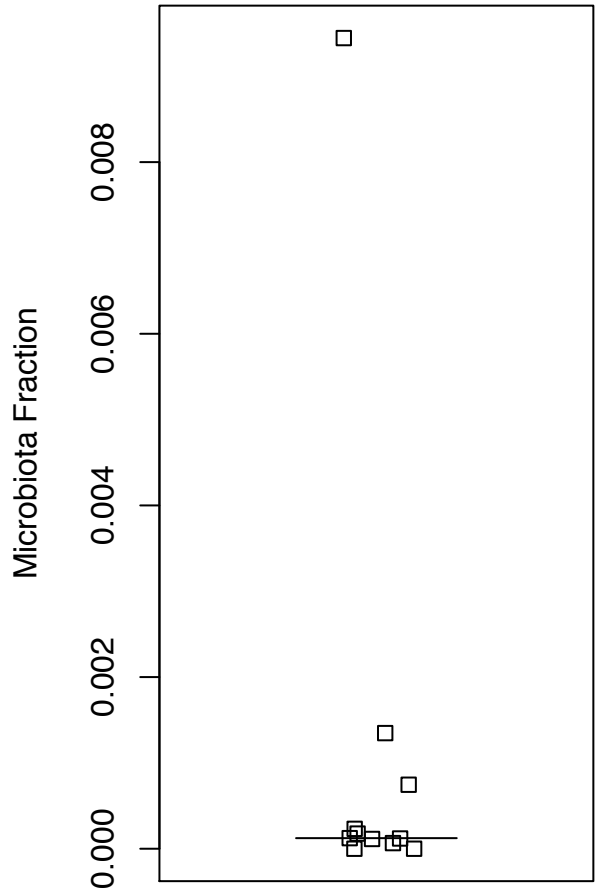



OTU\_91  
p-value: 0.45735

non-dry

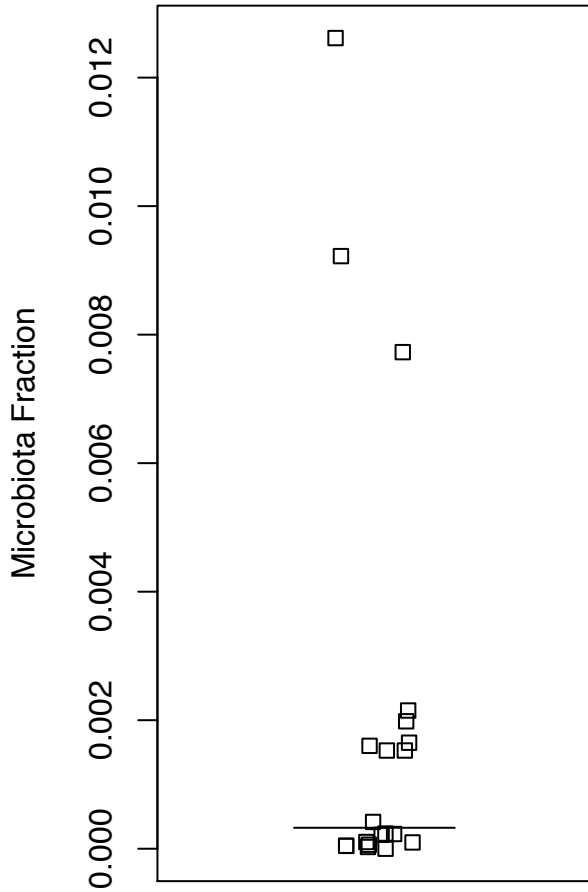

dry

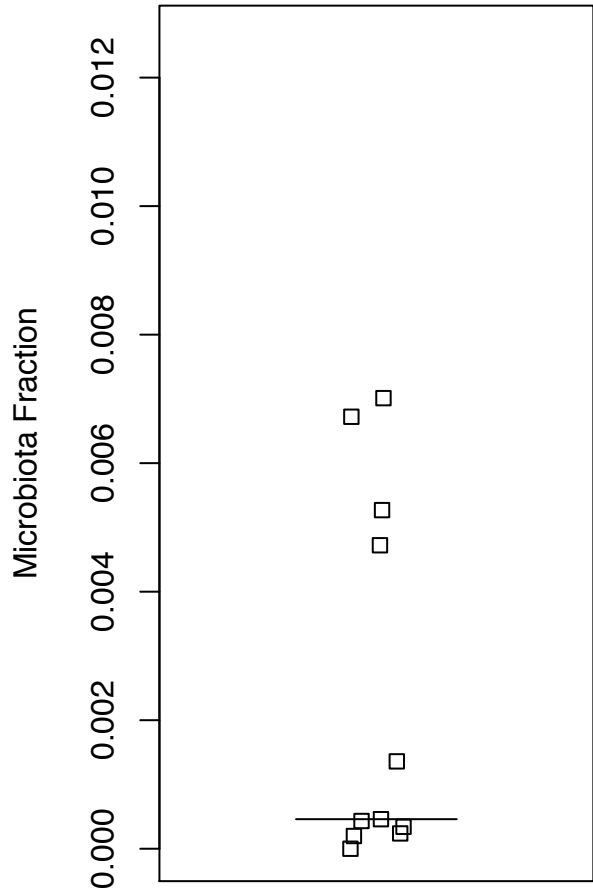





OTU\_93  
p-value: 0.24539

**non-dry**

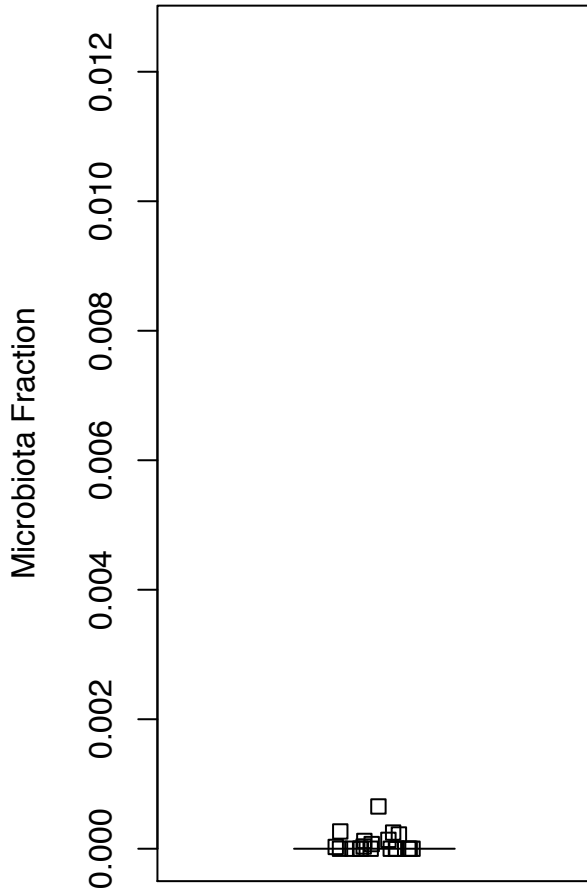

OTU\_96  
p-value: 0.03375

**non-dry**

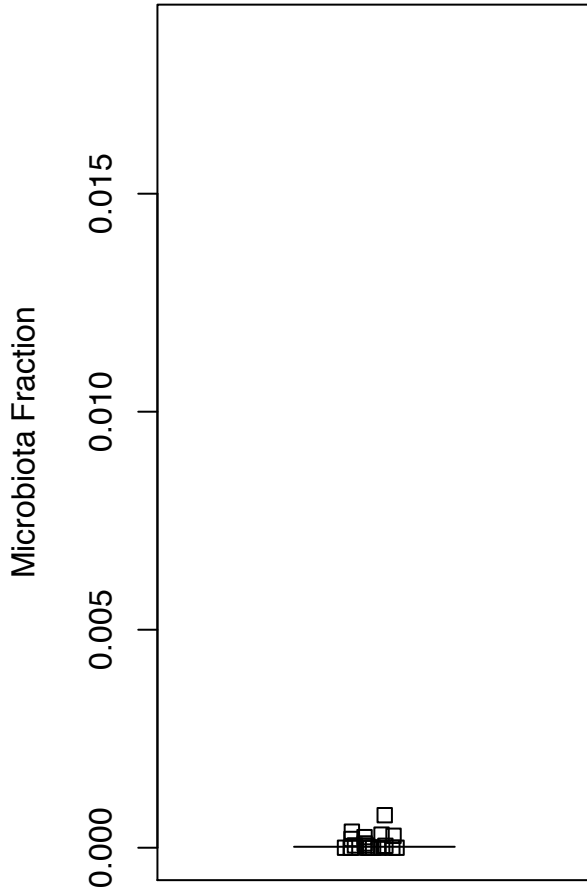

**dry**

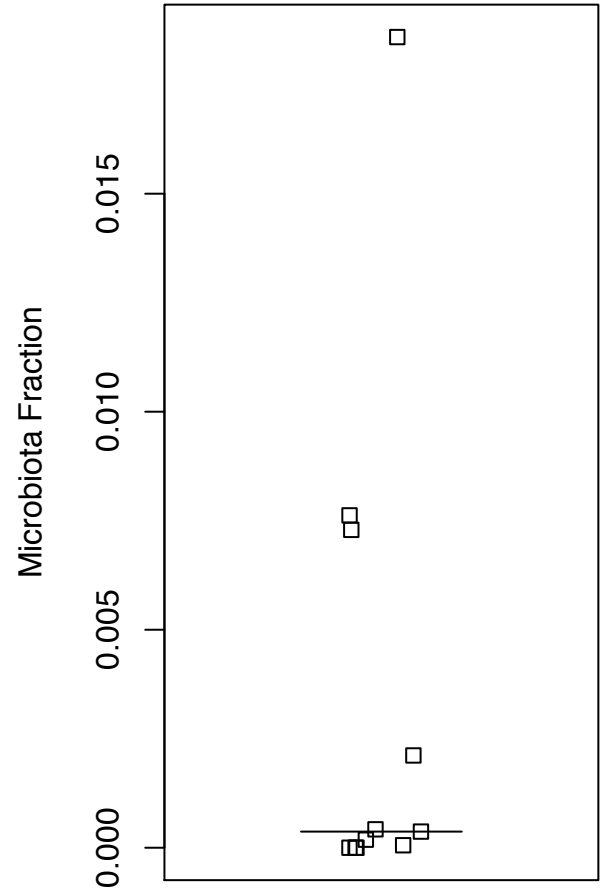







OTU\_106  
p-value: 0.57851

non-dry

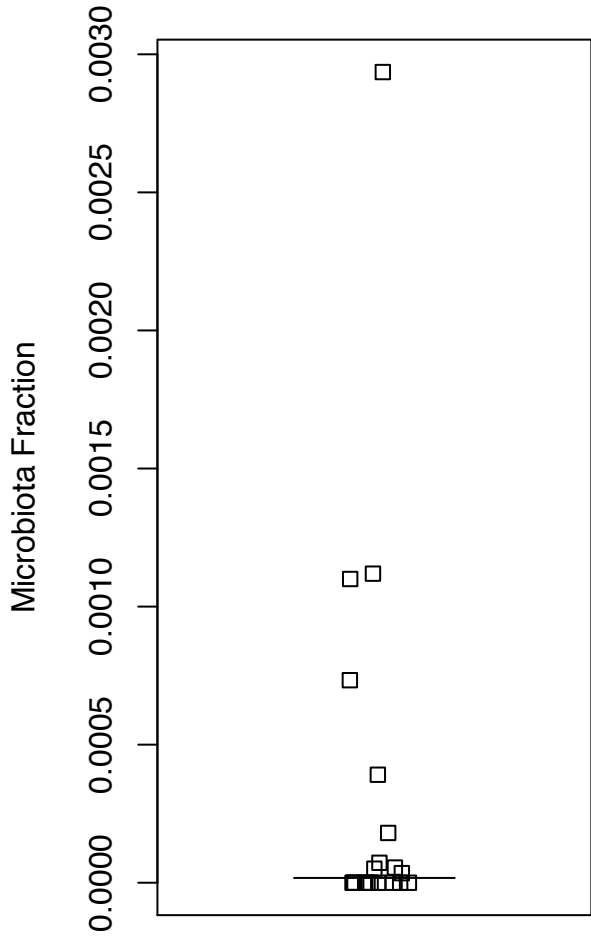

dry

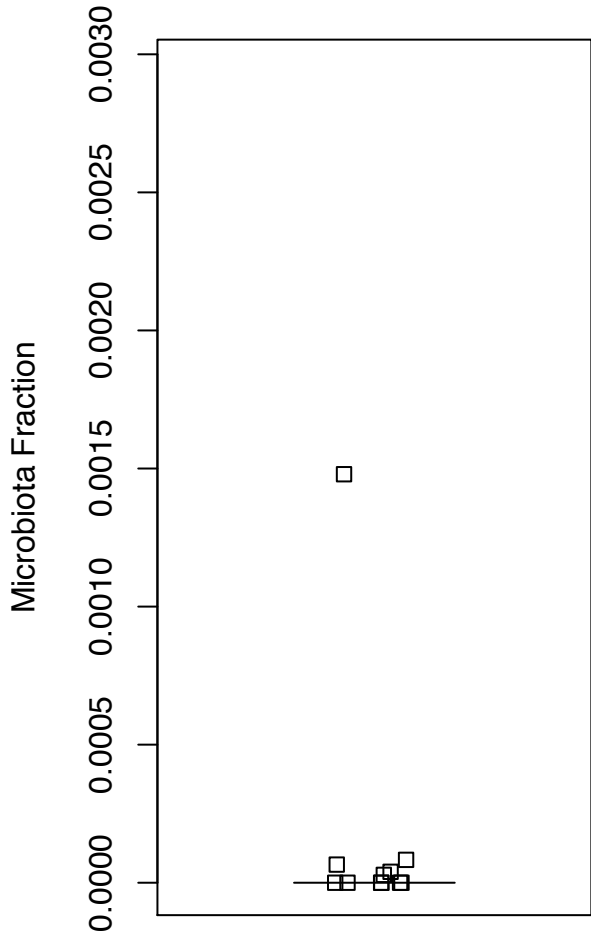



OTU\_110  
p-value: 0.26805

non-dry

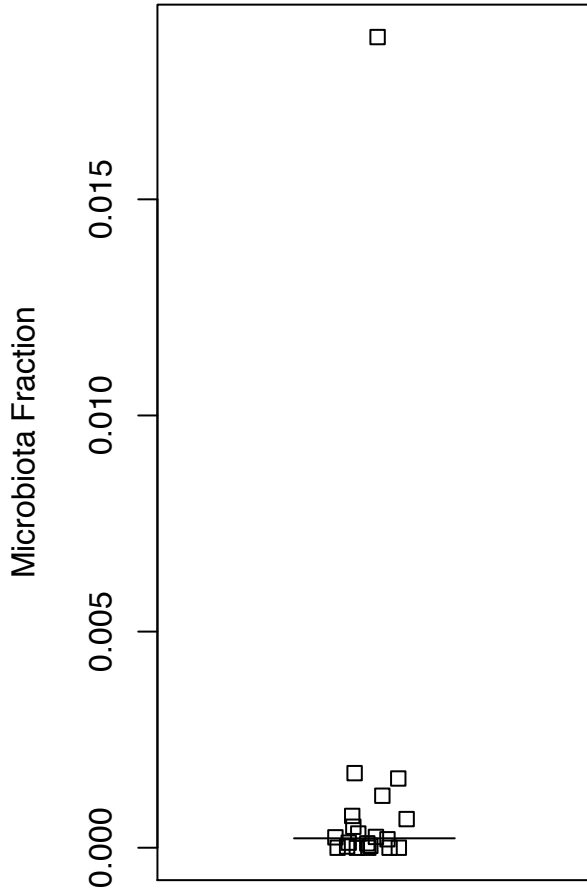

dry

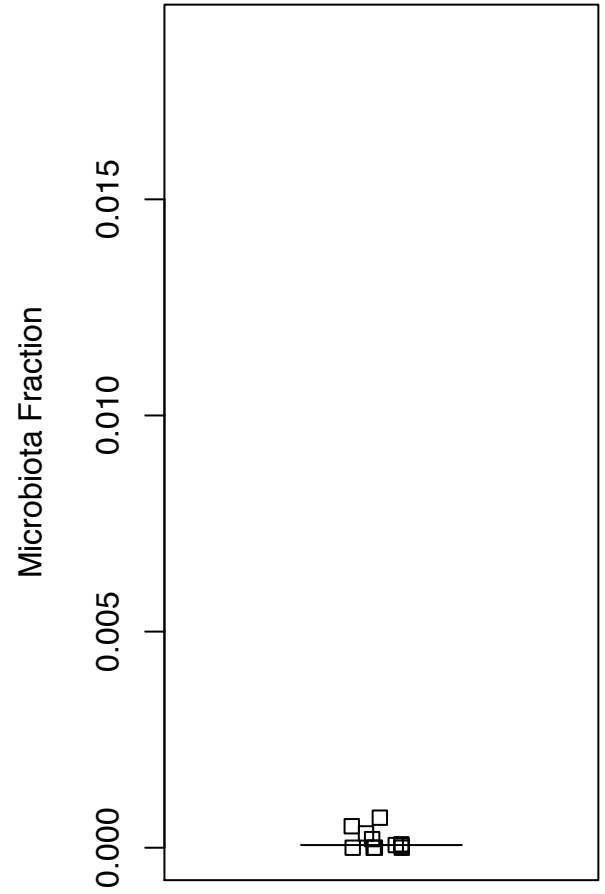









OTU\_123  
p-value: 0.17153

**non-dry**

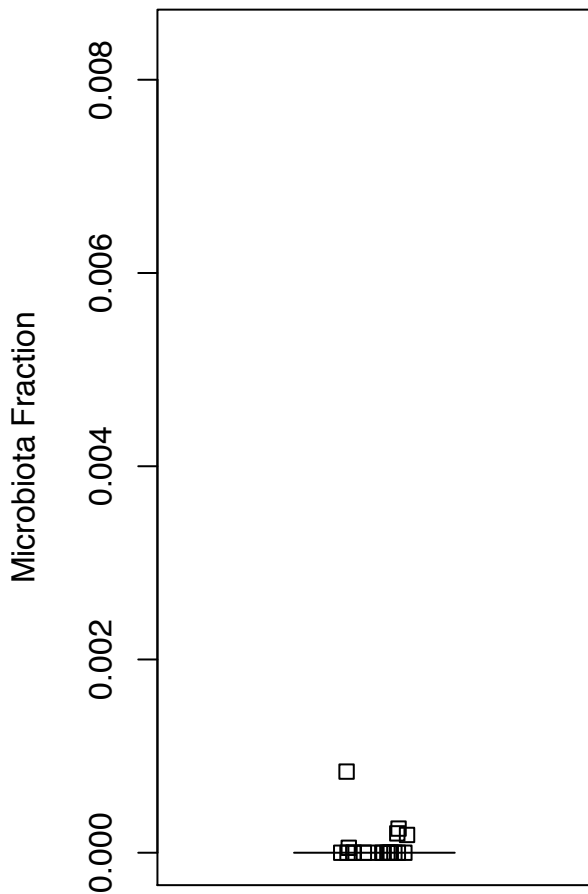

OTU\_124  
p-value: 0.52536

non-dry

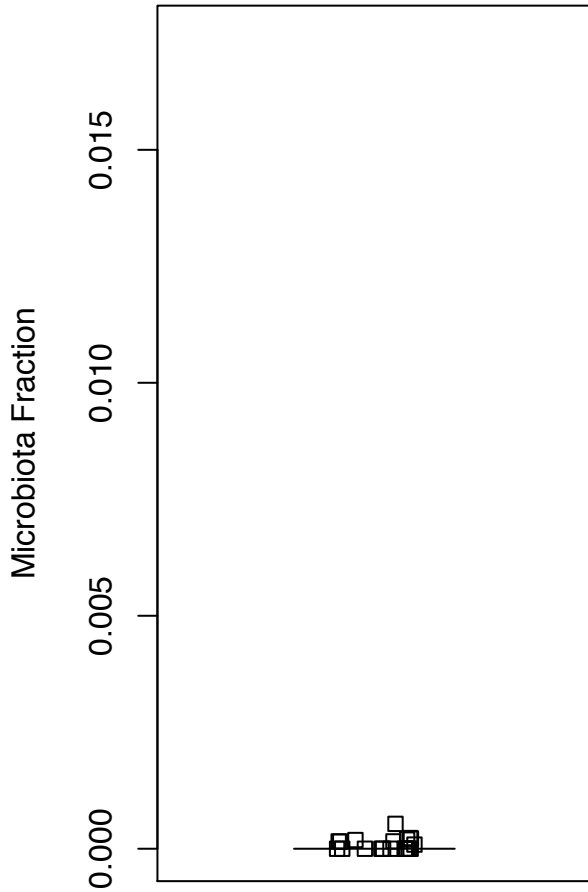

dry

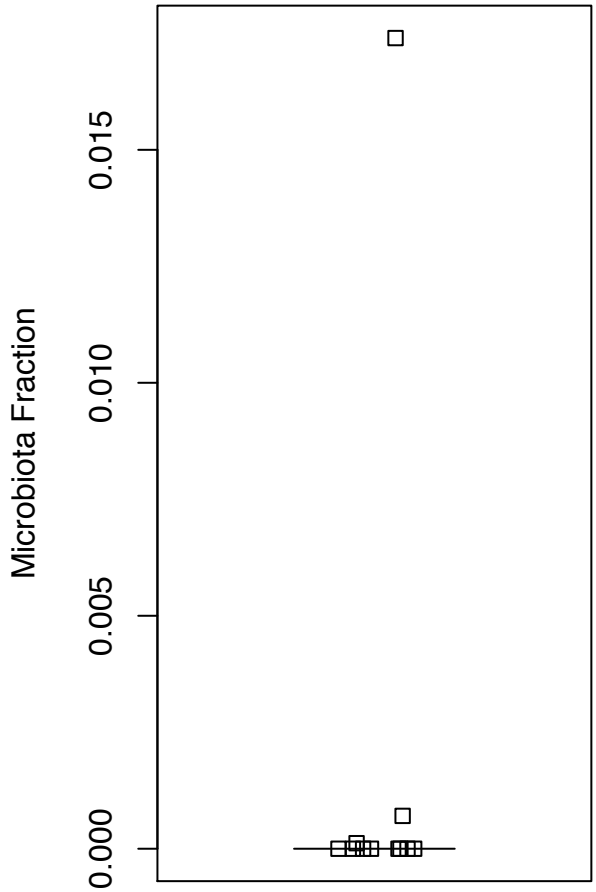

OTU\_127  
p-value: 0.01723

non-dry

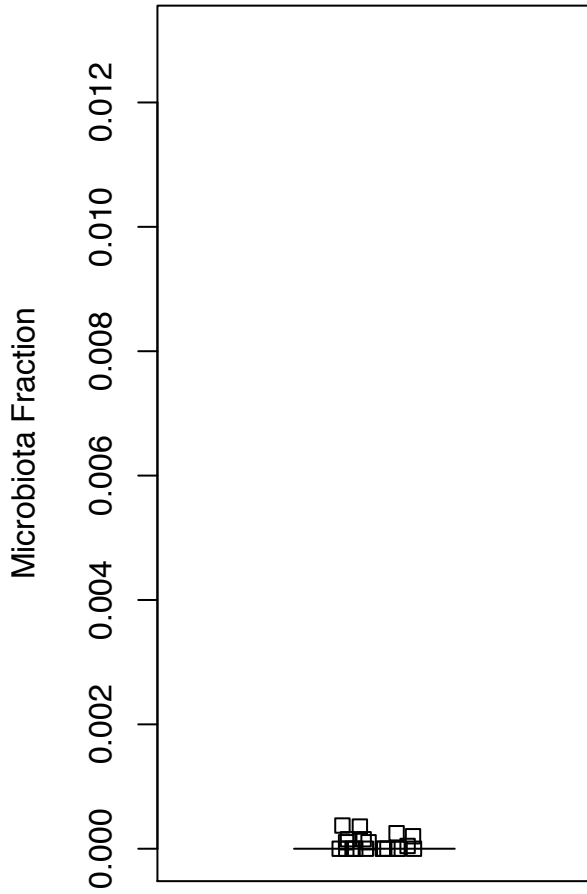

dry

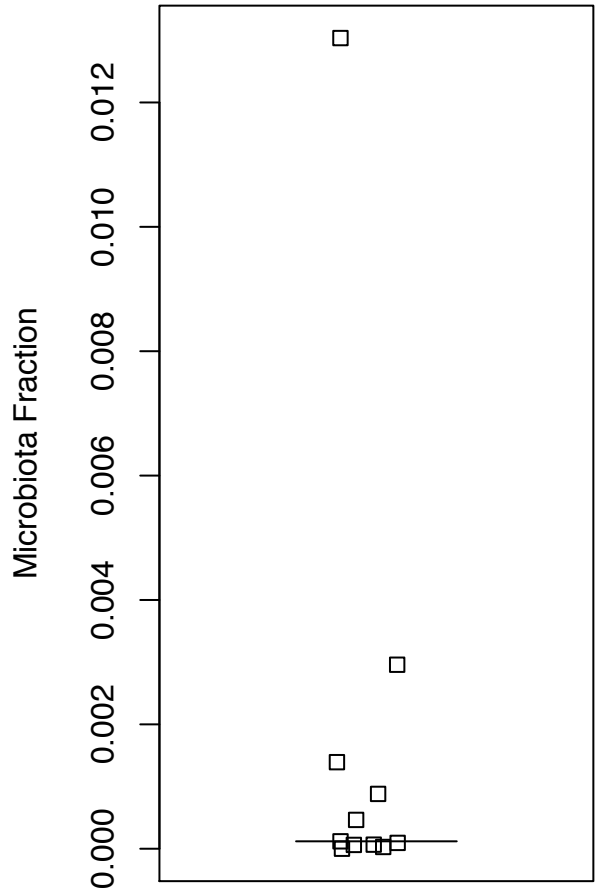

OTU\_131  
p-value: 0.23914

non-dry

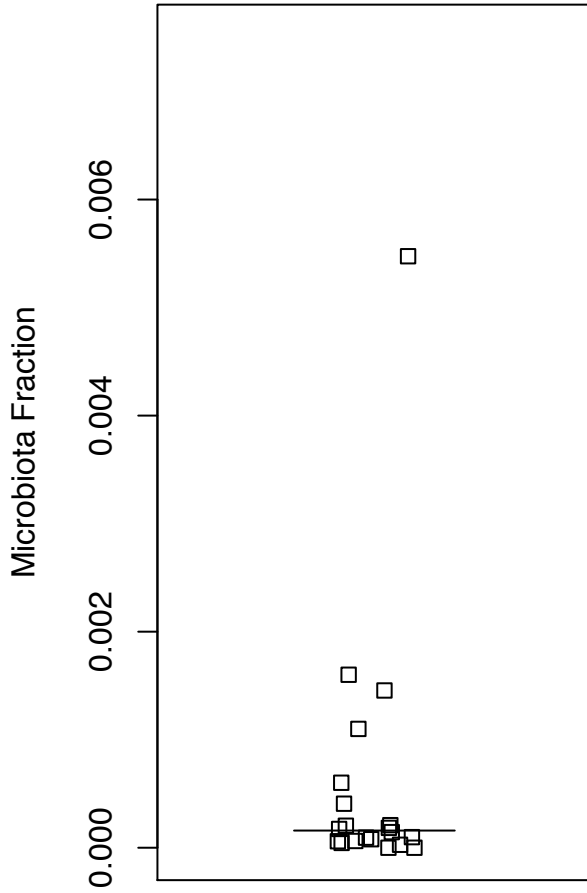

dry

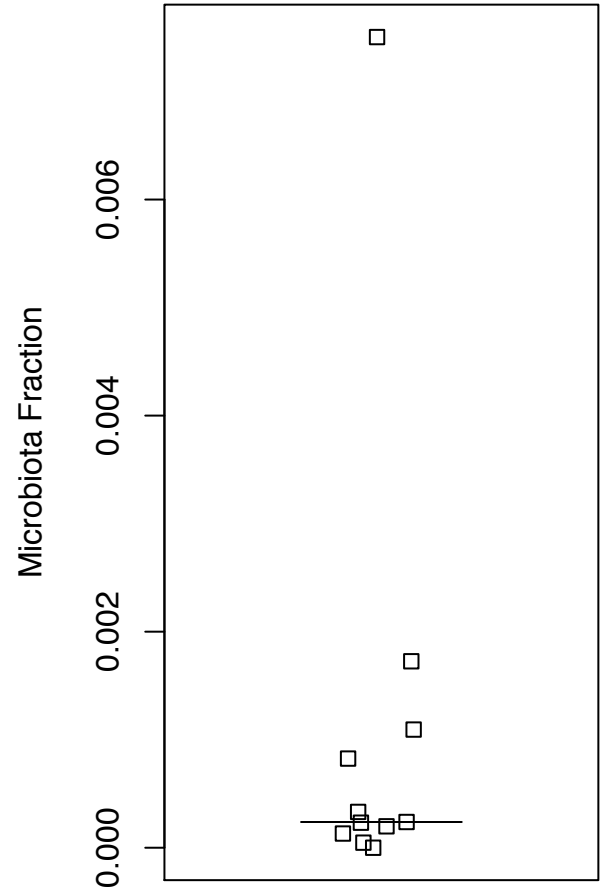









OTU\_142  
p-value: 0.05559

non-dry

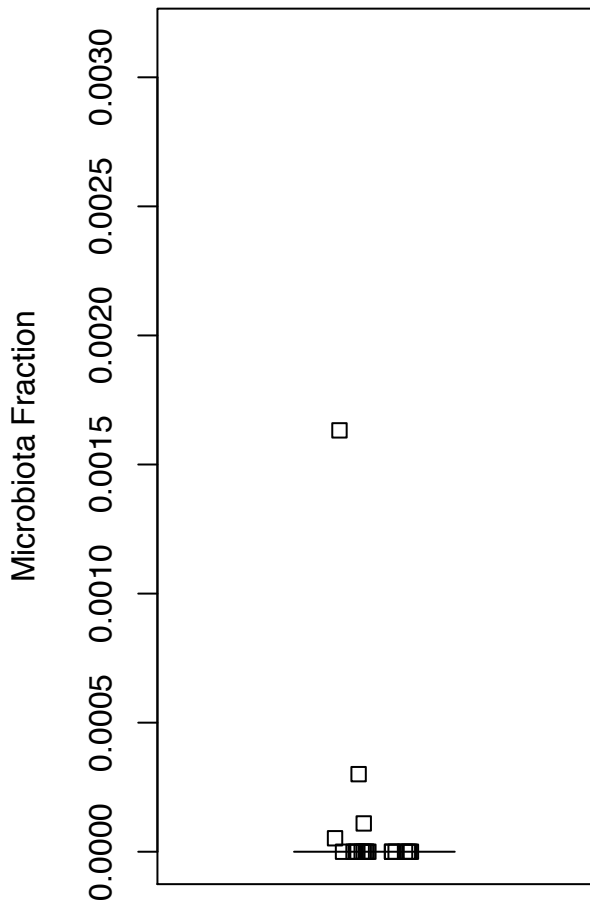

dry

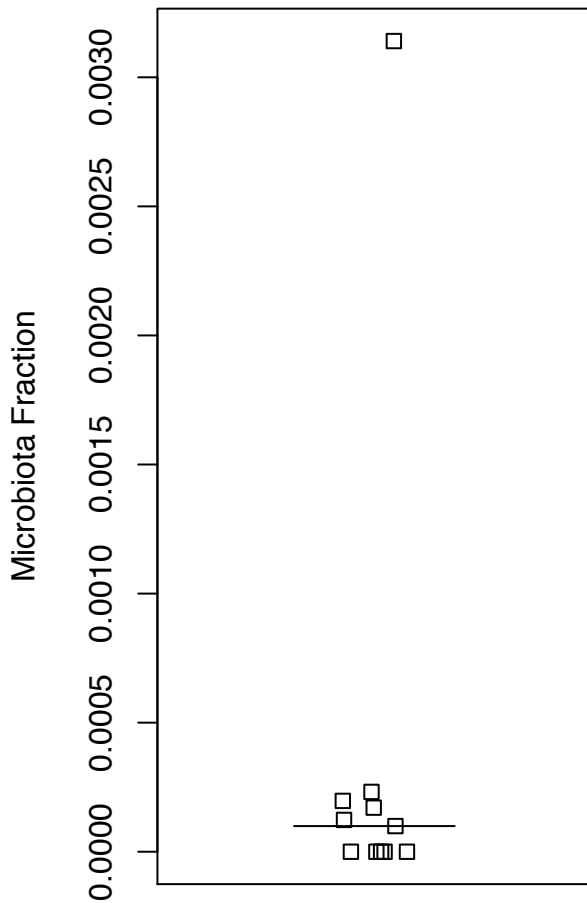

OTU\_145  
p-value: 0.18242

**non-dry**

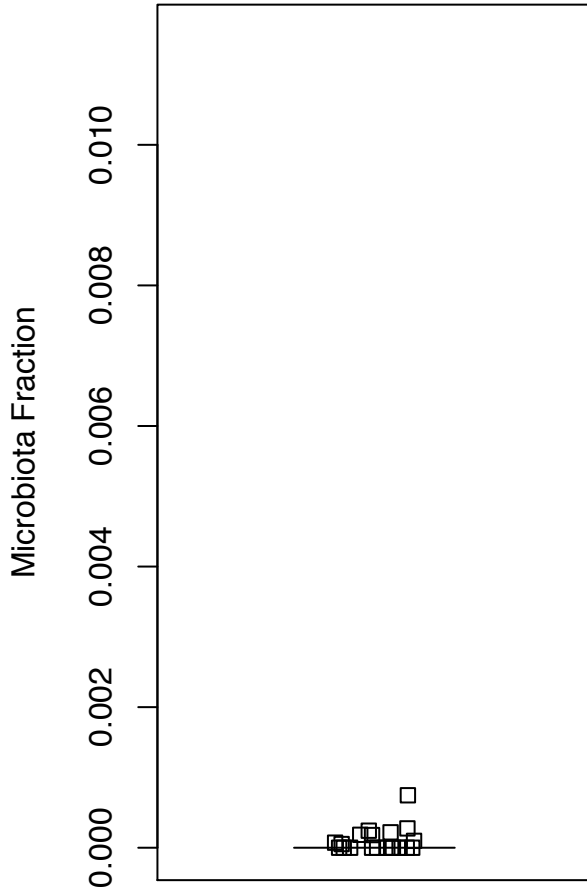

**dry**

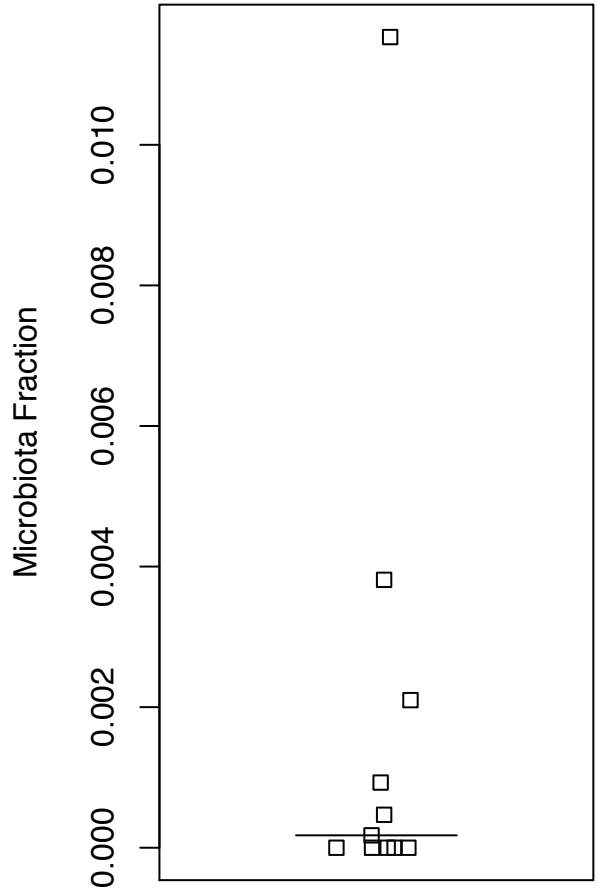











OTU\_169  
p-value: 0.25951

non-dry

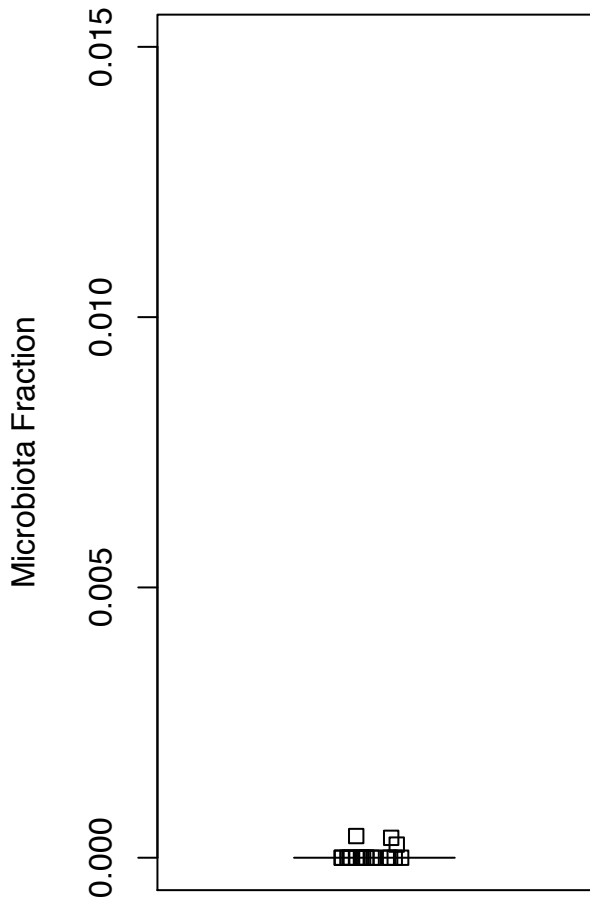

dry

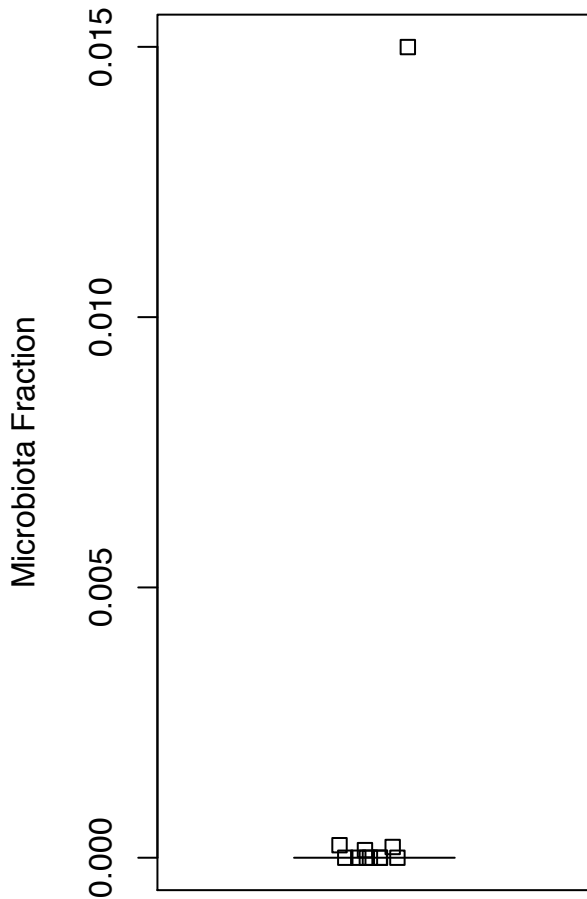

OTU\_175  
p-value: 0.56341

non-dry

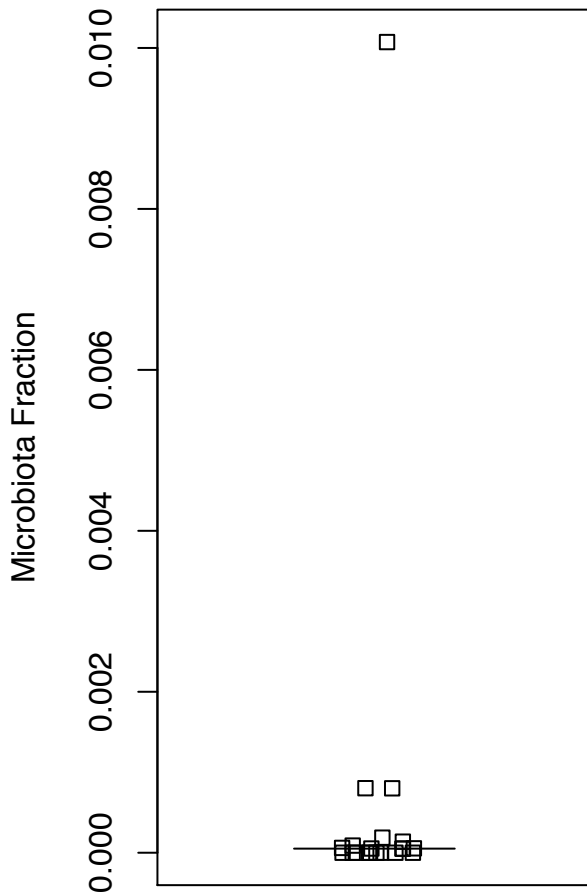



OTU\_194  
p-value: 0.40891

non-dry

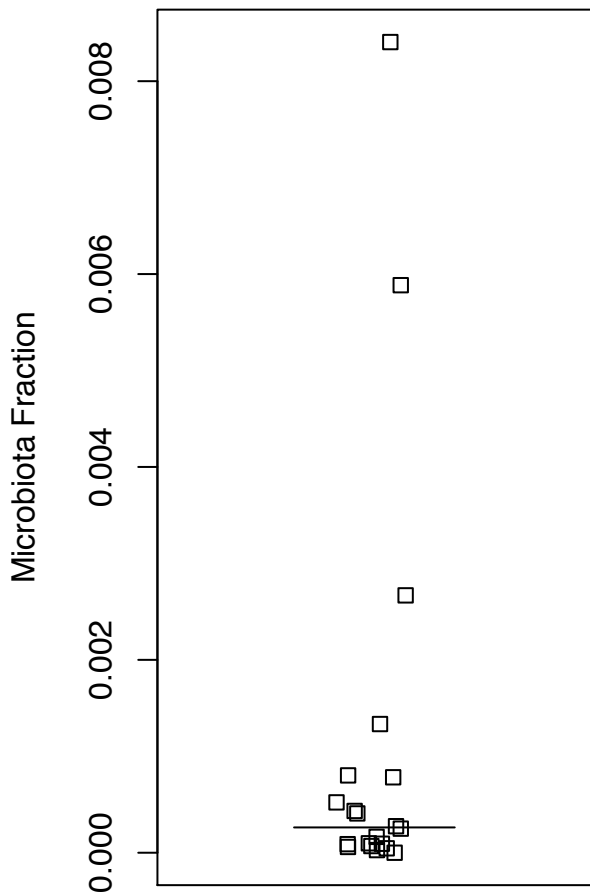

dry

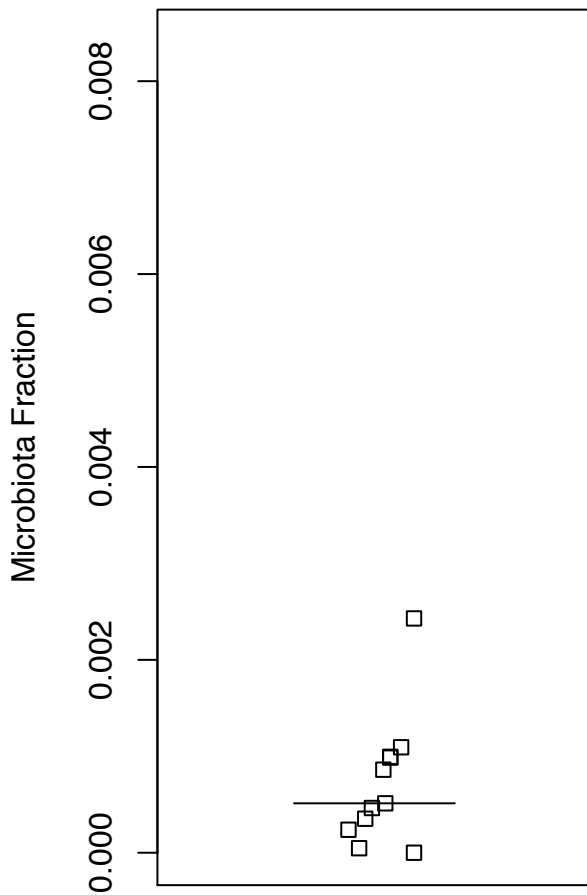







rem  
p-value: 0.01582

**non-dry**

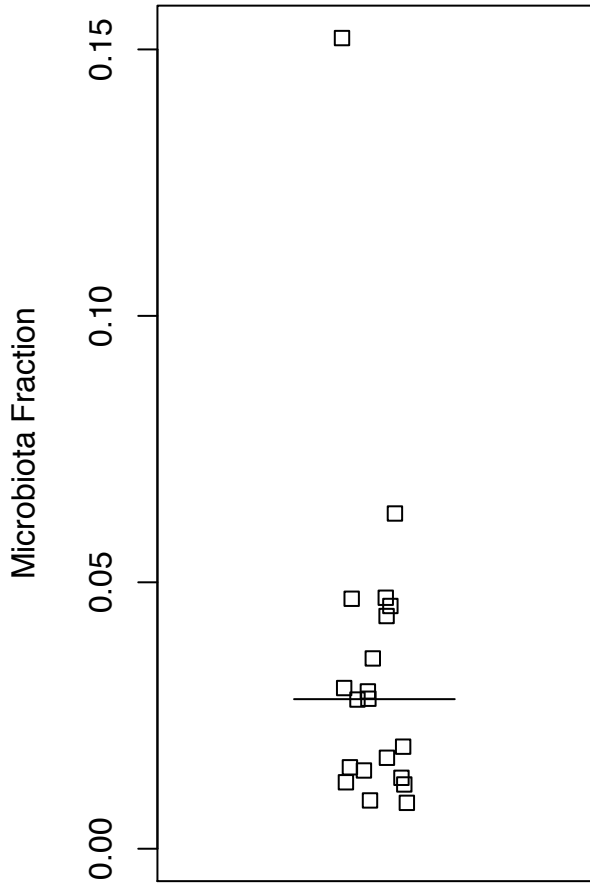

**dry**

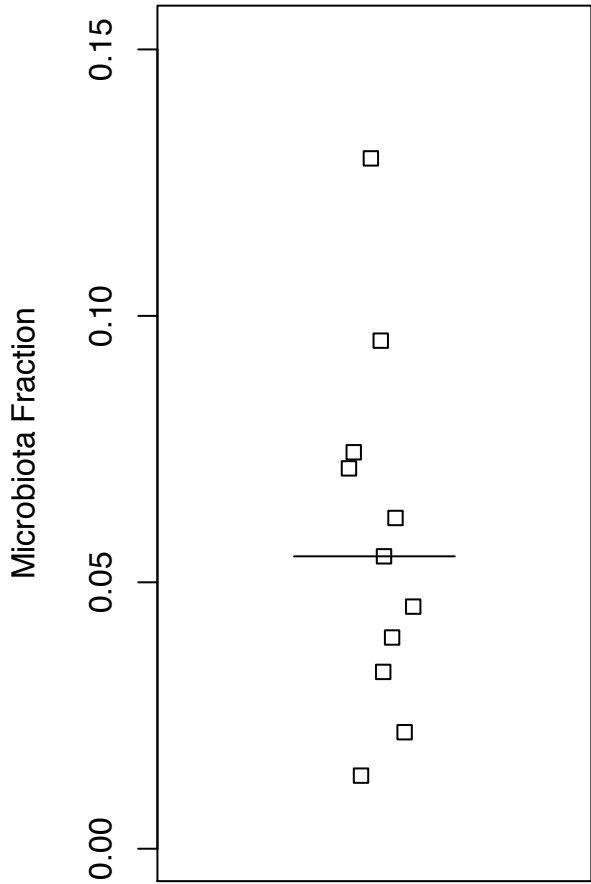

Supplement: pone.0026602.s002.pdf [file pone.0026602.s002.pdf]
