# Supplementary material for: Vaginal Microbiome and Epithelial Gene Array in Post-Menopausal Women with Moderate to Severe Dryness
Source: PubMed Central journal article supplement (PMC3206802; doi:10.1371/journal.pone.0026602), 2011-11-02

Participant ID-timepoint

Observed

Self-reported

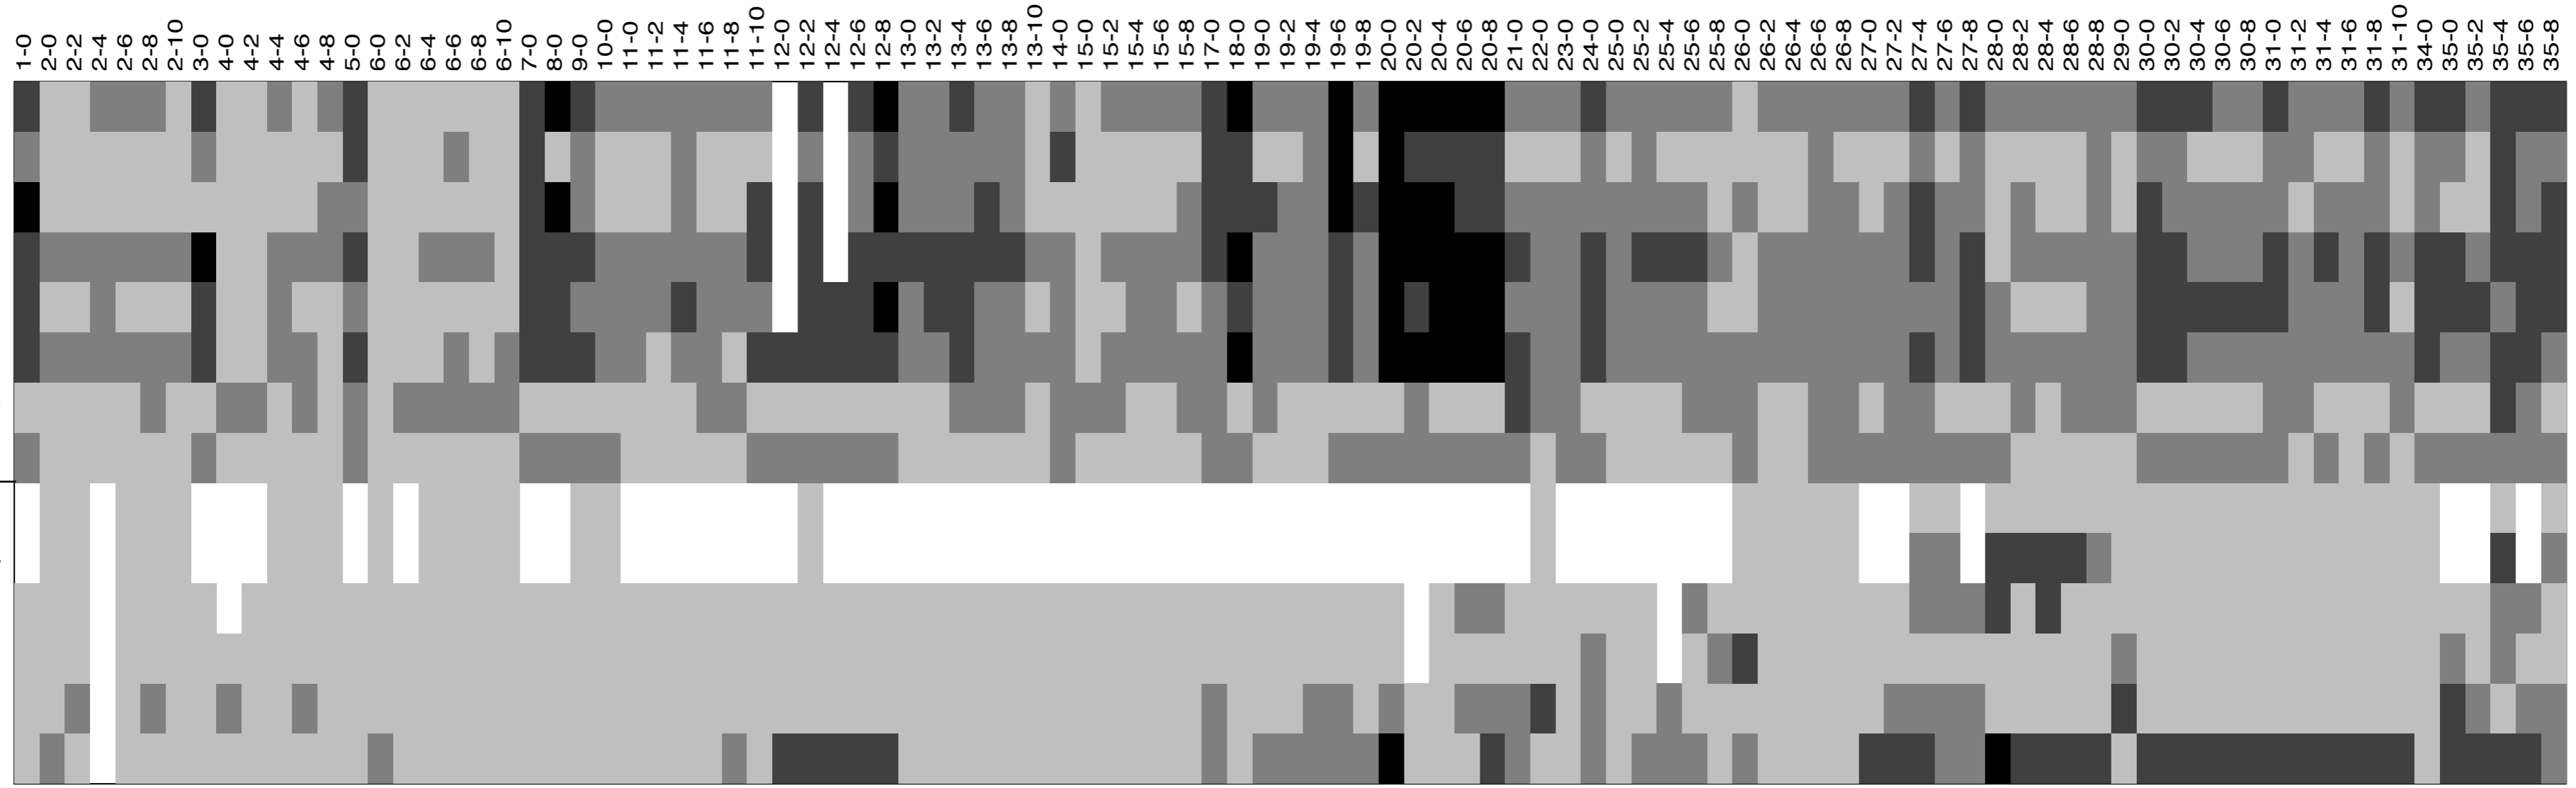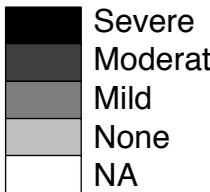

Supplement: pone.0026602.s001.pdf [file pone.0026602.s001.pdf]
