# Supplementary material for: Vaginal Microbiome and Epithelial Gene Array in Post-Menopausal Women with Moderate to Severe Dryness
Source: PubMed Central journal article supplement (PMC3206802; doi:10.1371/journal.pone.0026602), 2011-11-02
Supplement: pone.0026602.s003.pdf [file pone.0026602.s003.pdf]

| sequence_id | greengenes prokMSA_id | greengenes Sirmark_id | greengenes DNAML_id | greengenes DNAML_columns | greengenes tax string                                                                                                                                           | final name                                |
|-------------|-----------------------|-----------------------|---------------------|--------------------------|-----------------------------------------------------------------------------------------------------------------------------------------------------------------|-------------------------------------------|
| OTU_0       | 103092                | 66.67                 | 0.999993            | 29                       | k_Bacteria; p_Firmicutes; c_Bacilli; o_Lactobacillales; f_Lactobacillaceae; g_Lactobacillus; Unclassified; otu_1865                                             | Lactobacillus iners                       |
| OTU_1       | 21096                 | 100                   | 0.999993            | 29                       | k_Bacteria; p_Firmicutes; c_Bacilli; o_Lactobacillales; f_Lactobacillaceae; g_Lactobacillus; s_Lactobacillus crispatus; otu_1873                                | Lactobacillus crispatus                   |
| OTU_2       | 111763                | 70.59                 | 0.927641            | 29                       | k_Bacteria; p_Actinobacteria; c_Actinobacteria (class); o_Solirubrobacterales; f_Solirubrobacteraceae; Unclassified; otu_946                                    | Gardnerella vaginalis                     |
| OTU_3       | 133861                | 100                   | 0.999993            | 29                       | k_Bacteria; p_Actinobacteria; c_Actinobacteria (class); o_Coriobacteriales; f_Coriobacteriaceae; g_Attopobium; s_Attopobium vaginae; otu_921                    | Attopobium vaginae                        |
| OTU_4       | 55977                 | 100                   | 0.999993            | 29                       | k_Bacteria; p_Firmicutes; c_Bacilli; o_Lactobacillales; f_Streptococcaceae; g_Streptococcus; s_Streptococcus agalactiae; otu_1950                               | Streptococcus                             |
| OTU_5       | 265038                | 98.55                 | 0.962218            | 28                       | k_Bacteria; p_Firmicutes; c_Bacilli; o_Lactobacillales; f_Lactobacillaceae; g_Lactobacillus; s_Lactobacillus jensenii; otu_1889                                 | Lactobacillus jensenii                    |
| OTU_6       | 83331                 | 100                   | 0.999993            | 29                       | k_Bacteria; p_Bacteroidetes; c_Bacteroidia; o_Bacteroidales; f_Prevotellaceae; g_Prevotella; Unclassified; otu_1034                                             | Prevotella tionsensis                     |
| OTU_7       | 250493                | 100                   | 0.999993            | 29                       | k_Bacteria; p_Bacteroidetes; c_Bacteroidia; o_Bacteroidales; f_Prevotellaceae; g_Prevotella; Unclassified; otu_1034                                             | Prevotella bivia                          |
| OTU_8       | 103092                | 100                   | 0.999993            | 29                       | k_Bacteria; p_Firmicutes; c_Bacilli; o_Lactobacillales; f_Lactobacillaceae; g_Lactobacillus; Unclassified; otu_1865                                             | Lactobacillus gasseri/johnsonii           |
| OTU_9       | 264562                | 36.99                 | 0.577622            | 29                       | k_Bacteria; p_Bacteroidetes; c_Flavobacteriales; o_Flavobacteriales; f_Flavobacteriaceae; g_Flavobacterium; s_Flavobacterium succinicans; otu_1109              | Porphyromonas                             |
| OTU_10      | 161818                | 74.65                 | 0.999993            | 29                       | k_Bacteria; p_Firmicutes; c_Clostridia; o_Clostridiales; f_Veillonellaceae; g_Megasphaera; Unclassified; otu_2216                                               | Veillonellaceae dialister/megasphaera     |
| OTU_11      | 15488                 | 89.86                 | 0.999993            | 29                       | k_Bacteria; p_Firmicutes; c_Bacilli; o_Lactobacillales; f_Streptococcaceae; g_Streptococcus; s_Streptococcus anginosus; otu_1952                                | Streptococcus anginosus                   |
| OTU_12      | 161654                | 100                   | 0.999993            | 29                       | k_Bacteria; p_Firmicutes; c_Bacilli; o_Lactobacillales; f_Lactobacillaceae; g_Lactobacillus; s_Lactobacillus delbrueckii; otu_1876                              | Lactobacillus delbrueckii spp. bulgaricus |
| OTU_13      | 15851                 | 63.08                 | 0.841453            | 28                       | k_Bacteria; p_Tenericutes; c_Mollicutes; o_Mycoplasmatales; f_Mycoplasmataceae; g_Mycoplasma; Unclassified; otu_4272                                            | Mycoplama                                 |
| OTU_14      | 102801                | 49.28                 | 0.926885            | 29                       | k_Bacteria; p_Firmicutes; c_Clostridia; o_Clostridiales; f_Clostridiaceae; g_Caminicella; otu_2004                                                              | Clostridiales BVAB1                       |
| OTU_15      | 33338                 | 72.06                 | 0.999993            | 29                       | k_Bacteria; p_Bacteroidetes; c_Bacteroidia; o_Bacteroidales; f_Porphyrinomonadaceae; g_Porphyrinomonas; s_Porphyrinomonas gingivalis; otu_1029                  | Porphyromonas                             |
| OTU_16      | 70784                 | 52.17                 | 0.795612            | 29                       | k_Bacteria; p_Proteobacteria; c_Gammaproteobacteria; o_Oceanospirillales; f_Halomonadaceae; g_Halomonas; s_Halomonas muralis; otu_3763                          | Leptotrichia ammonii                      |
| OTU_17      | 15072                 | 100                   | 0.999993            | 29                       | k_Bacteria; p_Firmicutes; c_Bacilli; o_Lactobacillales; f_Aerococcaceae; g_Aerococcus; s_Aerococcus urinae; otu_1810                                            | Aerococcus urinae                         |
| OTU_18      | 11384                 | 100                   | 0.963831            | 29                       | k_Bacteria; p_Actinobacteria; c_Actinobacteria (class); o_Coriobacteriales; f_Coriobacteriaceae; g_Attopobium; s_Attopobium rimae; otu_920                      | Attopobium rimae                          |
| OTU_19      | 176207                | 57.35                 | 0.962741            | 29                       | k_Bacteria; p_Firmicutes; c_Bacilli; o_Bacillales; f_Bacillaceae; g_Bacillus; Unclassified; otu_1570                                                            | Clostridiales BVAB2                       |
| OTU_20      | 100589                | 48.1                  | 0.963962            | 29                       | k_Bacteria; p_Actinobacteria; c_Actinobacteria (class); o_Actinomycetales; f_Corynebacteriaceae; g_Corynebacterium; s_Brevibacterium stationis; otu_341         | Corynebacterium                           |
| OTU_21      | 291490                | 56.52                 | 0.999993            | 29                       | k_Bacteria; p_Bacteroidetes; c_Bacteroidia; o_Bacteroidales; f_Prevotellaceae; g_Prevotella; Unclassified; otu_1034                                             | Prevotella amnii                          |
| OTU_22      | 249686                | 100                   | 0.999993            | 29                       | k_Bacteria; p_Firmicutes; c_Bacilli; o_Lactobacillales; f_Lactobacillaceae; g_Lactobacillus; s_Lactobacillus acidophilus; otu_1867                              | Lactobacillus acidophilus                 |
| OTU_23      | 14284                 | 82.19                 | 0.999993            | 29                       | k_Bacteria; p_Firmicutes; c_Clostridia; o_Clostridiales; f_Clostridiales Family XI. Incertae Sedis; g_Anaerococcus; Unclassified; otu_2044                      | Anaerococcus                              |
| OTU_24      | 292080                | 98.55                 | 0.925635            | 28                       | k_Bacteria; p_Firmicutes; c_Bacilli; o_Lactobacillales; f_Lactobacillaceae; g_Lactobacillus; Unclassified; otu_1865                                             | Lactobacillus vaginalis                   |
| OTU_25      | 110646                | 50.72                 | 0.847761            | 29                       | k_Bacteria; p_Firmicutes; c_Clostridia; o_Clostridiales; f_Heliobacteriaceae; g_Heliobacterium; Unclassified; otu_2084                                          | Sneathia                                  |
| OTU_26      | 69910                 | 67.65                 | 0.926885            | 29                       | k_Bacteria; p_Firmicutes; c_Clostridia; o_Clostridiales; f_Prevotellaceae; g_Prevotella; Unclassified; otu_1034                                                 | Prevotella disiens                        |
| OTU_27      | 183158                | 100                   | 0.963962            | 29                       | k_Bacteria; p_Firmicutes; c_Clostridia; o_Clostridiales; f_Clostridiales Family XI. Incertae Sedis; g_Peptoniphilus; s_Peptoniphilus asaccharolyticus; otu_2055 | Peptoniphilus                             |
| OTU_28      | 109876                | 100                   | 0.999993            | 29                       | k_Bacteria; p_Firmicutes; c_Clostridia; o_Clostridiales; f_Veillonellaceae; g_Dialister; s_Dialister microaerophilus; otu_2212                                  | Dialister microaerophilus                 |
| OTU_29      | 45427                 | 76.47                 | 0.999993            | 29                       | k_Bacteria; p_Actinobacteria; c_Actinobacteria (class); o_Actinomycetales; f_Actinomycetaceae; g_Actinomycetes; s_Actinomycetes odontolyticus; otu_286          | Actinomycetes odontolyticus               |
| OTU_30      | 9676                  | 100                   | 0.999993            | 29                       | k_Bacteria; p_Proteobacteria; c_Gammaproteobacteria; o_Enterobacteriales; f_Enterobacteriaceae; Unclassified; otu_3529                                          | Enterobacterium                           |
| OTU_31      | 288039                | 100                   | 0.999993            | 29                       | k_Bacteria; p_Firmicutes; c_Clostridia; o_Clostridiales; f_Clostridiaceae; Unclassified; otu_1999                                                               | Clostridiaceae                            |
| OTU_32      | 107851                | 100                   | 0.999993            | 29                       | k_Bacteria; p_Firmicutes; c_Bacilli; o_Lactobacillales; f_Lactobacillaceae; g_Lactobacillus; Unclassified; otu_1865                                             | Lactobacillus rhamnosus/casei             |
| OTU_33      | 109501                | 70.42                 | 0.964936            | 29                       | k_Bacteria; p_Firmicutes; c_Clostridia; o_Clostridiales; f_Veillonellaceae; g_Dialister; s_Dialister microaerophilus; otu_2212                                  | Dialister                                 |
| OTU_34      | 253383                | 42.47                 | 0.793475            | 29                       | k_Bacteria; p_Firmicutes; c_Bacilli; o_Bacillales; f_Bacillaceae; g_Bacillus; s_Bacillus agaradhaerens; otu_1572                                                | Bacillus                                  |
| OTU_35      | 140250                | 100                   | 0.999993            | 29                       | k_Bacteria; p_Actinobacteria; c_Actinobacteria (class); o_Actinomycetales; f_Actinomycetaceae; g_Actinomycetes; s_Actinomycetes neulii; otu_285                 | Actinomycetes neulii                      |
| OTU_36      | 105160                | 100                   | 0.999993            | 29                       | k_Bacteria; p_Firmicutes; c_Bacilli; o_Bacillales; f_Staphylococcaceae; g_Staphylococcus; Unclassified; otu_1772                                                | Staphylococcus                            |
| OTU_37      | 107871                | 100                   | 0.999993            | 29                       | k_Bacteria; p_Firmicutes; c_Bacilli; o_Lactobacillales; f_Lactobacillaceae; g_Lactobacillus; s_Lactobacillus fermentum; otu_1879                                | Lactobacillus fermentum                   |
| OTU_38      | 81082                 | 100                   | 0.963962            | 29                       | k_Bacteria; p_Firmicutes; c_Clostridia; o_Clostridiales; f_Clostridiales Family XI. Incertae Sedis; g_Finegoldia; Unclassified; otu_2049                        | Finegoldia magna                          |
| OTU_39      | 158230                | 68.12                 | 0.843924            | 29                       | k_Bacteria; p_Firmicutes; c_Clostridia; o_Clostridiales; f_Ruminococcaceae; Unclassified; otu_2159                                                              | Prevotellaceae                            |
| OTU_40      | 111568                | 100                   | 0.999993            | 29                       | k_Bacteria; p_Bacteroidetes; c_Bacteroidia; o_Bacteroidales; f_Prevotellaceae; g_Prevotella; s_Prevotella histicola; otu_1039                                   | Prevotella                                |
| OTU_41      | 109997                | 85.07                 | 0.999993            | 29                       | k_Bacteria; p_Actinobacteria; c_Actinobacteria (class); o_Actinomycetales; f_Actinomycetaceae; g_Varibaculum; s_Varibaculum cambriense; otu_298                 | Varibaculum                               |
| OTU_42      | 83408                 | 100                   | 0.999993            | 29                       | k_Bacteria; p_Firmicutes; c_Clostridia; o_Clostridiales; f_Clostridiales Family XI. Incertae Sedis; g_Parvimonas; s_Parvimonas micra; otu_2043                  | Parvimonas micra                          |
| OTU_43      | 153999                | 100                   | 0.999993            | 29                       | k_Bacteria; p_Firmicutes; c_Bacilli; o_Lactobacillales; f_Streptococcaceae; g_Streptococcus; Unclassified; otu_1949                                             | Streptococcus                             |
| OTU_44      | 175062                | 100                   | 0.999993            | 29                       | k_Bacteria; p_Firmicutes; c_Clostridia; o_Clostridiales; f_Clostridiales Family XI. Incertae Sedis; g_Anaerococcus; s_Anaerococcus hydrogenalis; otu_2045       | Anaerococcus                              |
| OTU_45      | 44642                 | 43.84                 | 0.926725            | 29                       | k_Bacteria; p_Firmicutes; c_Bacilli; o_Lactobacillales; f_Leuconostocaceae; g_Oenococcus; s_Oenococcus oeni; otu_1936                                           | OTU_45                                    |
| OTU_46      | 2196                  | 89.71                 | 0.999993            | 29                       | k_Bacteria; p_Bacteroidetes; c_Bacteroidia; o_Bacteroidales; f_Prevotellaceae; g_Prevotella; Unclassified; otu_1034                                             | Prevotella                                |
| OTU_47      | 107784                | 76.81                 | 0.999993            | 29                       | k_Bacteria; p_Firmicutes; c_Bacilli; o_Lactobacillales; f_Lactobacillaceae; g_Lactobacillus; Unclassified; otu_1865                                             | Lactobacillus                             |
| OTU_48      | 192848                | 74.4                  | 0.926885            | 29                       | k_Bacteria; p_Bacteroidetes; c_Bacteroidia; o_Bacteroidales; f_Prevotellaceae; g_Prevotella; Unclassified; otu_1034                                             | Prevotella                                |
| OTU_49      | 85281                 | 100                   | 0.999993            | 29                       | k_Bacteria; p_Proteobacteria; c_Gammaproteobacteria; o_Enterobacteriales; f_Enterobacteriaceae; Unclassified; otu_3529                                          | Enterobacteriaceae                        |
| OTU_50      | 236238                | 74.63                 | 0.963991            | 29                       | k_Bacteria; p_Actinobacteria; c_Actinobacteria (class); o_Actinomycetales; f_Corynebacteriaceae; g_Corynebacterium; s_Corynebacterium freneyi; otu_353          | Corynebacterium                           |
| OTU_51      | 15555                 | 100                   | 0.999993            | 29                       | k_Bacteria; p_Firmicutes; c_Bacilli; o_Lactobacillales; f_Streptococcaceae; g_Streptococcus; Unclassified; otu_1949                                             | Streptococcus                             |
| OTU_52      | 71061                 | 68.66                 | 0.926667            | 29                       | k_Bacteria; p_Actinobacteria; c_Actinobacteria (class); o_Actinomycetales; f_Corynebacteriaceae; g_Corynebacterium; Unclassified; otu_340                       | Corynebacterium                           |
| OTU_53      | 76547                 | 60.29                 | 0.926885            | 29                       | k_Bacteria; p_Firmicutes; c_Clostridia; o_Clostridiales; f_Clostridiales Family XIII. Incertae Sedis; Unclassified; otu_2066                                    | OTU_53                                    |
| OTU_54      | 210736                | 37.14                 | 0.648901            | 29                       | k_Bacteria; p_Firmicutes; c_Clostridia; o_Clostridiales; f_Peptostreptococcaceae; g_Peptostreptococcus; otu_2158                                                | OTU_54                                    |
| OTU_55      | 290474                | 86.96                 | 0.926958            | 29                       | k_Bacteria; p_Firmicutes; c_Clostridia; o_Clostridiales; f_Lachnospiraceae; Unclassified; otu_2087                                                              | OTU_55                                    |
| OTU_56      | 198874                | 72.6                  | 0.925868            | 29                       | k_Bacteria; p_Firmicutes; c_Clostridia; o_Clostridiales; f_Clostridiales Family XI. Incertae Sedis; g_Anaerococcus; Unclassified; otu_2044                      | Anaerococcus                              |
| OTU_57      | 22422                 | 53.62                 | 0.924066            | 28                       | k_Bacteria; p_Tenericutes; c_Erysipelotrichi; o_Erysipelotrichales; f_Erysipelotrichaceae; g_Bulleidia; s_Solobacterium moorei; otu_4200                        | Clostridiales BVAB3                       |
| OTU_58      | 217912                | 100                   | 0.964471            | 29                       | k_Bacteria; p_Firmicutes; c_Bacilli; o_Bacillales; f_Staphylococcaceae; g_Staphylococcus; Unclassified; otu_1772                                                | Staphylococcus                            |
| OTU_59      | 69866                 | 100                   | 0.999993            | 29                       | k_Bacteria; p_Actinobacteria; c_Actinobacteria (class); o_Actinomycetales; f_Corynebacteriaceae; g_Corynebacterium; s_Corynebacterium rieglisi; otu_366         | Corynebacterium                           |
| OTU_60      | 217968                | 83.1                  | 0.883064            | 29                       | k_Bacteria; p_Proteobacteria; c_Alphaproteobacteria; o_Rhodospirillales; f_Rhodospirillaceae; g_Roseomonas; Unclassified; otu_2786                              | Roseomonas                                |
| OTU_61      | 78008                 | 100                   | 0.999993            | 29                       | k_Bacteria; p_Actinobacteria; c_Actinobacteria (class); o_Actinomycetales; f_Actinomycetaceae; g_Mobiluncus; s_Mobiluncus curtisii; otu_295                     | Mobiluncus curtisii                       |
| OTU_62      | 137182                | 100                   | 0.999993            | 29                       | k_Bacteria; p_Firmicutes; c_Clostridia; o_Clostridiales; f_Clostridiales Family XI. Incertae Sedis; g_Anaerococcus; Unclassified; otu_2044                      | Anaerococcus                              |
| OTU_63      | 106977                | 100                   | 0.999993            | 29                       | k_Bacteria; p_Firmicutes; c_Bacilli; o_Lactobacillales; f_Lactobacillaceae; g_Lactobacillus; Unclassified; otu_1865                                             | Lactobacillus plantarum                   |
| OTU_64      | 111587                | 100                   | 0.999993            | 28                       | k_Bacteria; p_Actinobacteria; c_Actinobacteria (class); o_Bifidobacteriales; f_Bifidobacteriaceae; g_Alloscardovia; s_Alloscardovia omnicoles; otu_895          | Alloscardovia omnicoles                   |
| OTU_65      | 96612                 | 100                   | 0.999993            | 29                       | k_Bacteria; p_Firmicutes; c_Clostridia; o_Clostridiales; f_Veillonellaceae; g_Veillonella; s_Veillonella montpellierensis; otu_2232                             | Veillonella montpellierensis              |
| OTU_66      | 105312                | 100                   | 0.963991            | 29                       | k_Bacteria; p_Actinobacteria; c_Actinobacteria (class); o_Actinomycetales; f_Mycobacteriaceae; g_Mycobacterium; Unclassified; otu_578                           | Mycobacterium                             |
| OTU_67      | 109876                | 75.71                 | 0.96357             | 28                       | k_Bacteria; p_Firmicutes; c_Clostridia; o_Clostridiales; f_Veillonellaceae; g_Dialister; s_Dialister microaerophilus; otu_2212                                  | Dialister                                 |
| OTU_68      | 11212                 | 100                   | 0.999993            | 29                       | k_Bacteria; p_Proteobacteria; c_Epsilonproteobacteria; o_Campylobacterales; f_Campylobacteraceae; g_Campylobacter; s_Campylobacter hominis; otu_3326            | Campylobacter                             |
| OTU_69      | 103712                | 91.67                 | 0.999993            | 29                       | k_Bacteria; p_Fusobacteria; c_Fusobacteria (class); o_Fusobacteriales; f_Fusobacteriaceae; g_Fusobacterium; Unclassified; otu_2287                              | Fusobacterium                             |
| OTU_70      | 128363                | 91.18                 | 0.886974            | 29                       | k_Bacteria; p_Actinobacteria; c_Actinobacteria (class); o_Bifidobacteriales; f_Bifidobacteriaceae; g_Gardnerella; s_Gardnerella vaginalis; otu_911              | Gardnerella vaginalis                     |
| OTU_71      | 100234                | 100                   | 0.999993            | 29                       | k_Bacteria; p_Proteobacteria; c_Gammaproteobacteria; o_Enterobacteriales; f_Enterobacteriaceae; Unclassified; otu_3529                                          | Enterobacteriaceae                        |
| OTU_72      | 110305                | 47.37                 | 0.926289            | 29                       | k_Bacteria; p_Actinobacteria; c_Actinobacteria (class); o_Actinomycetales; Unclassified; otu_271                                                                | OTU_72                                    |
| OTU_73      | 108033                | 40.79                 | 0.965154            | 29                       | k_Bacteria; p_Firmicutes; c_Bacilli; o_Lactobacillales; f_Streptococcaceae; g_Lactococcus; s_Lactococcus lactis; otu_1947                                       | OTU_73                                    |
| OTU_74      | 348164                | 43.94                 | 0.607436            | 28                       | k_Bacteria; p_Proteobacteria; c_Gammaproteobacteria; o_Vibrionales; f_Vibrionaceae; g_Vibrionella; Unclassified; otu_3973                                       | Proteobacteria                            |
| OTU_75      | 222105                | 69.12                 | 0.999993            | 29                       | k_Bacteria; p_Actinobacteria; c_Actinobacteria (class); o_Actinomycetales; f_Corynebacteriaceae; g_Corynebacterium; Unclassified; otu_340                       | Corynebacterium                           |
| OTU_77      | 138357                | 79.71                 | 0.964733            | 29                       | k_Bacteria; p_Firmicutes; c_Bacilli; o_Lactobacillales; f_Lactobacillaceae; g_Lactobacillus; s_Lactobacillus coelestis; otu_1872                                | Lactobacillus                             |
| OTU_79      | 128356                | 100                   | 0.999993            | 29                       | k_Bacteria; p_Firmicutes; c_Clostridia; o_Clostridiales; f_Clostridiales Family XI. Incertae Sedis; g_Anaerococcus; s_Anaerococcus hydrogenalis; otu_2045       | Anaerococcus hydrogenalis                 |
| OTU_81      | 23588                 | 100                   | 0.999993            | 27                       | k_Bacteria; p_Firmicutes; c_Clostridia; o_Clostridiales; f_Ruminococcaceae; g_Ruminococcus; Unclassified; otu_2178                                              | Ruminococcus                              |
| OTU_82      | 214782                | 100                   | 0.999993            | 29                       | k_Bacteria; p_Actinobacteria; c_Actinobacteria (class); o_Bifidobacteriales; f_Bifidobacteriaceae; g_Bifidobacterium; s_Bifidobacterium bifidum; otu_899        | Bifidobacterium bifidum                   |
| OTU_83      | 77836                 | 100                   | 0.999993            | 29                       | k_Bacteria; p_Proteobacteria; c_Alphaproteobacteria; o_Rhizobiales; f_Methylobacteriaceae; g_Methylobacterium; s_Methylobacterium adhaesivum; otu_2553          | Methylobacterium                          |
| OTU_84      | 192451                | 78.57                 | 0.999993            | 29                       | k_Bacteria; p_Firmicutes; c_Clostridia; o_Clostridiales; f_Clostridiales Family XI. Incertae Sedis; g_Peptoniphilus; s_Peptoniphilus asaccharolyticus; otu_2055 | Peptoniphilus                             |
| OTU_85      | 94580                 | 100                   | 0.999993            | 29                       | k_Bacteria; p_Actinobacteria; c_Actinobacteria (class); o_Actinomycetales; f_Actinomycetaceae; g_Mobiluncus; s_Mobiluncus mulleri; otu_296                      | Mobiluncus mulleri                        |
| OTU_87      | 219668                | 76.71                 | 0.999993            | 29                       | k_Bacteria; p_Firmicutes; c_Clostridia; o_Clostridiales; f_Clostridiales Family XI. Incertae Sedis; g_Anaerococcus; Unclassified; otu_2044                      | Anaerococcus                              |
| OTU_89      | 18812                 | 100                   | 0.999993            | 29                       | k_Bacteria; p_Actinobacteria; c_Actinobacteria (class); o_Actinomycetales; f_Propionibacteriaceae; g_Propionibacterium; s_Propionibacterium acnes; otu_720      | Propionibacterium                         |
| OTU_90      | 103661                | 100                   | 0.999993            | 29                       | k_Bacteria; p_Firmicutes; c_Clostridia; o_Clostridiales; f_Lachnospiraceae; g_Roseburia; s_Eubacterium rectale; otu_2131                                        | Eubacterium rectale                       |
| OTU_91      | 111763                | 63.24                 | 0.927641            | 29                       | k_Bacteria; p_Actinobacteria; c_Actinobacteria (class); o_Solirubrobacterales; f_Solirubrobacteraceae; Unclassified; otu_946                                    | Gardnerella vaginalis                     |
| OTU_92      | 14257                 | 65.22                 | 0.962741            | 29                       | k_Bacteria; p_Firmicutes; c_Clostridia; o_Clostridiales; f_Lactobacillaceae; g_Lactobacillus; Unclassified; otu_2074                                            | OTU_92                                    |
| OTU_93      | 108085                | 57.35                 | 0.887381            | 29                       | k_Bacteria; p_Actinobacteria; c_Actinobacteria (class); o_Actinomycetales; f_Micrococcaceae; g_Arthroacter; Unclassified; otu_505                               | Arthroacter                               |
| OTU_96      | 107102                | 100                   | 0.999993            | 29                       | k_Bacteria; p_Proteobacteria; c_Betaproteobacteria; o_Burkholderiales; f_Burkholderiaceae; g_Ralstonia; Unclassified; otu_3005                                  | Ralstonia                                 |
| OTU_98      | 157133                | 71.64                 | 0.999993            | 29                       | k_Bacteria; p_Actinobacteria; c_Actinobacteria (class); o_Actinomycetales; f_Intrasporangiaceae; g_Serinococcus; otu_428                                        | Actinomycetales                           |
| OTU_102     | 72264                 | 100                   | 0.999993            | 29                       | k_Bacteria; p_Actinobacteria; c_Actinobacteria (class); o_Actinomycetales; f_Corynebacteriaceae; g_Corynebacterium; Unclassified; otu_340                       | Corynebacterium                           |
| OTU_103     | 63560                 | 100                   | 0.999993            | 29                       | k_Bacteria; p_Firmicutes; c_Bacilli; o_Bacillales; f_Paenibacillaceae; g_Paenibacillus; Unclassified; otu_1688                                                  | Paenibacillus                             |

| sequence_id | greengenes prokMSA_id | greengenes Simrank_id | greengenes DNAML_id | greengenes DNAML columns | greengenes tax string                                                                                                                                             | final name             |
|-------------|-----------------------|-----------------------|---------------------|--------------------------|-------------------------------------------------------------------------------------------------------------------------------------------------------------------|------------------------|
| OTU_106     | 298762                | 100                   | 0.999993            | 29                       | k_Bacteria; p_Actinobacteria; c_Actinobacteria (class); o_Bifidobacteriales; f_Bifidobacteriaceae; g_Bifidobacterium; s_Bifidobacterium longum; otu_905           | Bifidobacterium longum |
| OTU_107     | 68416                 | 100                   | 0.999993            | 29                       | k_Bacteria; p_Bacteroidetes; c_Bacteroidia; o_Bacteroidales; f_Prevotellaceae; g_Prevotella; Unclassified; otu_1034                                               | Prevotella             |
| OTU_110     | 14284                 | 94.52                 | 0.999993            | 29                       | k_Bacteria; p_Firmicutes; c_Clostridia; o_Clostridiales; f_Clostridiales Family XI. Incertae Sedis; g_Anaerococcus; Unclassified; otu_2044                        | Anaerococcus           |
| OTU_111     | 57712                 | 80.6                  | 0.999993            | 29                       | k_Bacteria; p_Actinobacteria; c_Actinobacteria (class); o_Actinomycetales; f_Corynebacteriaceae; g_Corynebacterium; s_Corynebacterium aurimucosum; otu_344        | Corynebacterium        |
| OTU_116     | 151926                | 91.18                 | 0.999993            | 29                       | k_Bacteria; p_Firmicutes; c_Clostridia; o_Clostridiales; f_Clostridiales; g_Clostridium; Unclassified; otu_2005                                                   | Clostridium            |
| OTU_120     | 103407                | 68.12                 | 0.965052            | 29                       | k_Bacteria; p_Firmicutes; c_Clostridia; o_Clostridiales; f_Lachnospiraceae; g.; Unclassified; otu_2088                                                            | OTU_120                |
| OTU_123     | 368769                | 52.94                 | 0.924153            | 28                       | k_Bacteria; p_Firmicutes; c_Clostridia; o_Clostridiales; f_Clostridiales Family XI. Incertae Sedis; g_Anaerococcus; s_Anaerococcus hydrogenalis; otu_2045         | OTU_123                |
| OTU_124     | 84459                 | 70.31                 | 0.926667            | 29                       | k_Bacteria; p_Actinobacteria; c_Actinobacteria (class); o_Actinomycetales; f_Corynebacteriaceae; g_Corynebacterium; s_Corynebacterium tuberculostearicum; otu_368 | Actinobaculum          |
| OTU_127     | 248907                | 92.65                 | 0.964922            | 29                       | k_Bacteria; p_Actinobacteria; c_Actinobacteria (class); o_Actinomycetales; f_Corynebacteriaceae; g_Corynebacterium; Unclassified; otu_340                         | Corynebacterium        |
| OTU_131     | 111763                | 58.82                 | 0.927641            | 29                       | k_Bacteria; p_Actinobacteria; c_Actinobacteria (class); o_Solirubrobacterales; f_Solirubrobacteriaceae; Unclassified; otu_946                                     | Gardnerella            |
| OTU_132     | 69910                 | 60.29                 | 0.928004            | 29                       | k_Bacteria; p_Bacteroidetes; c_Bacteroidia; o_Bacteroidales; f_Prevotellaceae; g_Prevotella; Unclassified; otu_1034                                               | OTU_132                |
| OTU_138     | 13945                 | 43.28                 | 0.451425            | 28                       | k_Bacteria; p_Firmicutes; c_Clostridia; o_Clostridiales; f_Lachnospiraceae; g_Butyrvibrio; Unclassified; otu_2097                                                 | OTU_138                |
| OTU_140     | 90638                 | 100                   | 0.999993            | 29                       | k_Bacteria; p_Cyanobacteria; c_Chloroplast; o_Streptophyta; otu_1407                                                                                              | OTU_140                |
| OTU_142     | 33338                 | 52.24                 | 0.999993            | 29                       | k_Bacteria; p_Bacteroidetes; c_Bacteroidia; o_Bacteroidales; f_Porphyrionadaceae; g_Porphyrionas; s_Porphyrionas gingivalis; otu_1029                             | Porphyrionas           |
| OTU_145     | 101184                | 100                   | 0.964951            | 29                       | k_Bacteria; p_Proteobacteria; c_Betaproteobacteria; o_Burkholderiales; Unclassified; otu_2913                                                                     | Leptothrix             |
| OTU_149     | 93286                 | 85.92                 | 0.926958            | 29                       | k_Bacteria; p_Proteobacteria; c_Betaproteobacteria; o_Gallionellales; f_Gallionellaceae; Unclassified; otu_3080                                                   | Betaproteobacteria     |
| OTU_155     | 243807                | 86.96                 | 0.964297            | 29                       | k_Bacteria; p_Firmicutes; c_Bacilli; o_Bacillales; f_Paenibacillaceae; g_Paenibacillus; Unclassified; otu_1688                                                    | Paenibacillus          |
| OTU_156     | 50424                 | 41.18                 | 0.361167            | 29                       | k_Bacteria; p_Proteobacteria; c_Gammaproteobacteria; o_Alteromonadales; f_Alteromonadaceae; Unclassified; otu_3406                                                | OTU_156                |
| OTU_162     | 90545                 | 65.15                 | 0.964965            | 29                       | k_Bacteria; p_Actinobacteria; c_Actinobacteria (class); o_Actinomycetales; f_Streptomycetaceae; g_Streptomyces; Unclassified; otu_766                             | Actinomyces            |
| OTU_169     | 72536                 | 72.31                 | 0.999993            | 29                       | k_Bacteria; p_Actinobacteria; c_Actinobacteria (class); o_Actinomycetales; f_Actinomycetaceae; g_Actinomyces; Unclassified; otu_279                               | Actinomyces            |
| OTU_175     | 14032                 | 59.7                  | 0.88507             | 29                       | k_Bacteria; p_Firmicutes; c_Clostridia; o_Clostridiales; f_Lachnospiraceae; g_Ruminococcus; s_Ruminococcus gnavus; otu_2134                                       | Clostridiales          |
| OTU_191     | 104204                | 61.19                 | 0.843924            | 29                       | k_Bacteria; p_Firmicutes; c_Bacilli; o_Bacillales; f_Paenibacillaceae; g_Paenibacillus; s_Paenibacillus chitinolyticus; otu_1697                                  | Peptostreptococcus     |
| OTU_194     | 111763                | 57.35                 | 0.841511            | 29                       | k_Bacteria; p_Actinobacteria; c_Actinobacteria (class); o_Solirubrobacterales; f_Solirubrobacteriaceae; Unclassified; otu_946                                     | Gardnerella            |
| OTU_252     | 143401                | 37.14                 | 0.66723             | 29                       | k_Bacteria; p_Proteobacteria; c_Gammaproteobacteria; o_Oceanospirillales; f_Alcanivoraceae; g_Alcanivorax; s_Alcanivorax dieselolei; otu_3706                     | OTU_252                |
| OTU_323     | 76393                 | 58.82                 | 0.928004            | 29                       | k_Bacteria; p_Bacteroidetes; c_Bacteroidia; o_Bacteroidales; f_Prevotellaceae; g_Prevotella; Unclassified; otu_1034                                               | Prevotella             |
| OTU_708     | 78555                 | 64.71                 | 0.886974            | 29                       | k_Bacteria; p_Actinobacteria; c_Actinobacteria (class); o_Bifidobacteriales; f_Bifidobacteriaceae; Unclassified; otu_894                                          | Bifidobacteriaceae     |
