# Supplementary material for: Vaginal Microbiome and Epithelial Gene Array in Post-Menopausal Women with Moderate to Severe Dryness
Source: PubMed Central journal article supplement (PMC3206802; doi:10.1371/journal.pone.0026602), 2011-11-02
Supplement: pone.0026602.s004.pdf [file pone.0026602.s004.pdf]

| Column # | Transcript | Cluster ID   | gene_assignment                                                                                 | Gene Symbol | RefSeq       | p-value(Gene) | p-value(VA vs. Control) | Ratio(VA vs. Control) | Fold-Change(VA vs. Control) | Fold-Change(VA vs. Control) | Fold-Change(VA vs. Control) | (Description) | (tGene) | (SSGene) | (SSError) | (tError) |
|----------|------------|--------------|-------------------------------------------------------------------------------------------------|-------------|--------------|---------------|-------------------------|-----------------------|-----------------------------|-----------------------------|-----------------------------|---------------|---------|----------|-----------|----------|
| 25413    | 8105049    | NM_023566    | SPINK7 // serpin peptidase inhibitor, Kazal type 7 (putative) // 5a                             | SPINK7      | NM_023566    | 0.000481089   | 0.000481089             | 1.0                   | 0.0258712                   | -38.653                     | Vk down vs Control          |               | 31.9293 | 66.7185  | 16.7166   | 1        |
| 4806     | 806032     | NM_003245    | TGM3 // transglutaminase 3 (p-olypeptide, protein-lysine-aminomethyltransferase)                | TGM3        | NM_003245    | 4.24E-05      | 4.24E-05                | 0.0457455             |                             | -21.8601                    | Vk down vs Control          |               | 64.5243 | 47.5308  | 5.98308   | 1        |
| 18071    | 8081308    | NM_196538    | SERN // serpin peptidase inhibitor, clade B (ovalbumin), member 1                               | SERN        | NM_196538    | 3.28E-05      | 3.28E-05                | 0.0476884             |                             | -20.9494                    | Vk down vs Control          |               | 89.2785 | 46.2607  | 5.87577   | 1        |
| 14926    | 8000412    | NM_000967    | ITIH4 // inter-alpha-trypsin inhibitor 4 (type 1)                                               | ITIH4       | NM_000967    | 0.0002921     | 0.0002921               | 0.0569221             |                             | -14.6208                    | Vk down vs Control          |               | 11.2464 | 44.2565  | 32.8174   | 1        |
| 5902     | 7905515    | NM_010025231 | KPRP // keratinocyte proline-rich protein // 1a2.13 // 4488.84                                  | KPRP        | NM_010025231 | 0.00023404    | 0.00023404              | 0.0573658             |                             | -17.432                     | Vk down vs Control          |               | 39.8095 | 40.811   | 8.2037    | 1        |
| 10746    | 7961673    | NM_021957    | GS2 // glycogen synthase 2 (liver) // 12a1.2 // 2998 // ENST000000000000                        | GS2         | NM_021957    | 0.00166379    | 0.00166379              | 0.0595864             |                             | -16.7823                    | Vk down vs Control          |               | 21.54   | 39.7337  | 14.5774   | 1        |
| 8020     | 8020130    | NM_019492    | DGSI // desmoglein 1 // 18a1.1 // 1828 // ENST00000257192 // 0561                               | DGSI        | NM_019492    | 0.0001642     | 0.0001642               | 0.0597411             |                             | -14.0663                    | Vk down vs Control          |               | 39.8171 | 21.54    | 5.6687    | 1        |
| 2572     | 7920182    | NM_178435    | UCE1 // late cornified envelope 3 // 12a1.2 // 353145 // ENST000000000000                       | UCE1        | NM_178435    | 0.00067774    | 0.00067774              | 0.0615129             |                             | -15.3464                    | Vk down vs Control          |               | 10.6753 | 37.2534  | 10.7372   | 1        |
| 16528    | 8021594    | NM_021663    | LCE3D // late cornified envelope 3D // 1a1.1 // 84648 // ENST000000000000                       | LCE3D       | NM_021663    | 0.00327332    | 0.00327332              | 0.0624852             |                             | -14.6075                    | Vk down vs Control          |               | 17.1209 | 35.9192  | 16.3075   | 1        |
| 6628     | 8021908    | NM_080474    | SERPBNB12 // serpin peptidase inhibitor, clade B (ovalbumin), member 12                         | SERPBNB12   | NM_080474    | 0.00147164    | 0.00147164              | 0.0708944             |                             | -14.1055                    | Vk down vs Control          |               | 72.2054 | 34.9885  | 12.8278   | 1        |
| 7555     | 8021019    | NM_021709    | SRFBP3 // serpin peptidase inhibitor, clade B (ovalbumin), member 3                             | SRFBP3      | NM_021709    | 0.00026299    | 0.00026299              | 0.074311              |                             | -14.6208                    | Vk down vs Control          |               | 36.585  | 34.2078  | 6.48017   | 1        |
| 18069    | 8036072    | NM_207392    | KRTAP4 // keratinocyte differentiation-associated protein // 19a1.3                             | KRTAP4      | NM_207392    | 0.00216392    | 0.00216392              | 0.0764524             |                             | -13.08                      | Vk down vs Control          |               | 19.726  | 33.0213  | 13.3972   | 1        |
| 2149     | 8069790    | NM_011231    | CLDN17 // claudin 17 // 21a2.11 // 26285 // ENST00000286808 // CL                               | CLDN17      | NM_011231    | 0.00198787    | 0.00198787              | 0.0776486             |                             | -12.8785                    | Vk down vs Control          |               | 20.2986 | 32.6237  | 11.825    | 1        |
| 1993     | 7963491    | NM_006211    | KRT1 // keratin 1 // 12a1.2-q3 // 3848 // ENST0000025244 // KRT1                                | KRT1        | NM_006211    | 0.00115579    | 0.00115579              | 0.0834338             |                             | -11.9855                    | Vk down vs Control          |               | 24.2618 | 30.8148  | 10.1608   | 1        |
| 10387    | 8130807    | NM_023737    | LCC1 // late cornified envelope 1 // 1a1.1 // 441178 // AK056500 // LCC1                        | LCC1        | NM_023737    | 0.00466575    | 0.00466575              | 0.0918464             |                             | -10.8877                    | Vk down vs Control          |               | 15.0776 | 27.4772  | 15.1116   | 1        |
| 2768     | 8130980    | NM_0441178   | hypothetical LOC441178 // 6a2 // 441178 // AK056500 // LCC1                                     | LOC441178   | AK41178      | 0.00466575    | 0.00466575              | 0.0918464             |                             | -10.8877                    | Vk down vs Control          |               | 15.0776 | 27.4772  | 15.1116   | 1        |
| 5401     | 8127854    | NM_002395    | ME1 // metallopeptidase 1, NADPH-dependent, cytosolic // 6a2 // 4199                            | ME1         | NM_002395    | 0.00132211    | 0.00132211              | 0.094627              |                             | -10.5678                    | Vk down vs Control          |               | 23.2281 | 27.7702  | 9.56433   | 1        |
| 2702     | 7905486    | NM_019060    | CRC1 // cysteine-rich C-terminal 1 // 1a1 // 54544 // ENST000000000000                          | CRC1        | NM_019060    | 0.00385853    | 0.00385853              | 0.10203               |                             | -10.2586                    | Vk down vs Control          |               | 16.1144 | 26.0242  | 12.9037   | 1        |
| 17308    | 8126905    | NM_006061    | CRISP3 // cysteine-rich secretory protein 3 // 6a1.2.3 // 10321                                 | CRISP3      | NM_006061    | 0.00875558    | 0.00875558              | 0.10272               |                             | -7.9426                     | Vk down vs Control          |               | 11.8686 | 25.036   | 17.4585   | 1        |
| 2300     | 7964687    | NM_0099676   | CL20F56 // chromosome 12 open reading frame 56 // 12a1.2 // 11                                  | CL20F56     | NM_0099676   | 0.00115745    | 0.00115745              | 0.107874              |                             | -8.19604                    | Vk down vs Control          |               | 22.2506 | 24.916   | 8.1249    | 1        |
| 1394     | 8129261    | NM_019663    | UVGG6C // lymphocyte antigen 6 complex, locus G6C // 6a2.1.3 // 807                             | UVGG6C      | NM_019663    | 0.00476655    | 0.00476655              | 0.110685              |                             | -8.03465                    | Vk down vs Control          |               | 14.9365 | 24.206   | 12.9619   | 1        |
| 3216     | 8175856    | NM_021261    | UVGG6G // lymphocyte antigen 6 complex, locus G6G // 6a2.1.3 // 807                             | UVGG6G      | NM_021261    | 0.00469074    | 0.00469074              | 0.113355              |                             | -8.9802                     | Vk down vs Control          |               | 15.0357 | 24.0682  | 12.8054   | 1        |
| 2714     | 8125042    | NM_021261    | UVGG6G // lymphocyte antigen 6 complex, locus G6G // 6a2.1.3 // 807                             | UVGG6G      | NM_021261    | 0.00467873    | 0.00467873              | 0.117779              |                             | -8.49049                    | Vk down vs Control          |               | 15.0488 | 22.859   | 12.1484   | 1        |
| 2066     | 8059723    | NM_01013442  | EPGN // epithelial nitric oxide hemoglobin (mouse) // 4a1.3 // 253234                           | EPGN        | NM_01013442  | 0.00131442    | 0.00131442              | 0.117964              |                             | -8.47716                    | Vk down vs Control          |               | 17.365  | 22.8203  | 10.5133   | 1        |
| 1428     | 7904780    | NM_0094762   | AFIL1 // alpha-1-fetoprotein 1 // 3'-phosphoadenosine 5'-phosphoribosyl transferase 2 // 12a2.3 | AFIL1       | NM_0094762   | 0.000895102   | 0.000895102             | 0.122636              |                             | -8.1542                     | Vk down vs Control          |               | 25.5375 | 21.9985  | 6.8135    | 1        |
| 24016    | 8158771    | NM_013426    | AFIL1 // alpha-1-fetoprotein 1-like // 9a3.13-q3.4.3 // 1                                       | AFIL1       | NM_013426    | 0.000985012   | 0.000985012             | 0.122636              |                             | -8.1542                     | Vk down vs Control          |               | 25.5375 | 21.9985  | 6.8135    | 1        |
| 17754    | 8033151    | NM_133492    | AFIL1 // alkaline ceramidase 1 // 19a1.3 // 125981 // ENST000000000000                          | AFIL1       | NM_133492    | 0.00076524    | 0.00076524              | 0.123971              |                             | -8.0664                     | Vk down vs Control          |               | 27.6526 | 21.7721  | 6.29873   | 1        |
| 80430    | 804340     | NM_145693    | UPN1 // hemoglobin // 2a2.3 // 23175 // ENST0000025070 // UPN1 // 1                             | UPN1        | NM_145693    | 0.000824594   | 0.000824594             | 0.125617              |                             | -7.96072                    | Vk down vs Control          |               | 27.014  | 21.4979  | 6.30643   | 1        |
| 92743    | 80113756   | NM_01317556  | FAM25B // family with sequence similarity 25, member B // 10a1.1                                | FAM25B      | NM_01317556  | 0.000808751   | 0.000808751             | 0.126216              |                             | -7.92295                    | Vk down vs Control          |               | 26.4611 | 21.994   | 6.4697    | 1        |
| 7823     | 7933327    | NM_01137556  | FAM25B // family with sequence similarity 25, member B // 10a1.1                                | FAM25B      | NM_01137556  | 0.000808751   | 0.000808751             | 0.126216              |                             | -7.92295                    | Vk down vs Control          |               | 26.4611 | 21.994   | 6.4697    | 1        |
| 7834     | 7933423    | NM_01137556  | FAM25B // family with sequence similarity 25, member B // 10a1.1                                | FAM25B      | NM_01137556  | 0.000808751   | 0.000808751             | 0.126216              |                             | -7.92295                    | Vk down vs Control          |               | 26.4611 | 21.994   | 6.4697    | 1        |
| 80430    | 804340     | NM_145693    | UPN1 // hemoglobin // 2a2.3 // 23175 // ENST0000025070 // UPN1 // 1                             | UPN1        | NM_145693    | 0.000824594   | 0.000824594             | 0.125617              |                             | -7.96072                    | Vk down vs Control          |               | 27.014  | 21.4979  | 6.30643   | 1        |
| 92743    | 80113756   | NM_01317556  | FAM25B // family with sequence similarity 25, member B // 10a1.1                                | FAM25B      | NM_01317556  | 0.000808751   | 0.000808751             | 0.126216              |                             | -7.92295                    | Vk down vs Control          |               | 26.4611 | 21.994   | 6.4697    | 1        |
| 7823     | 7933327    | NM_01137556  | FAM25B // family with sequence similarity 25, member B // 10a1.1                                | FAM25B      | NM_01137556  | 0.000808751   | 0.000808751             | 0.126216              |                             | -7.92295                    | Vk down vs Control          |               | 26.4611 | 21.994   | 6.4697    | 1        |
| 7834     | 7933423    | NM_01137556  | FAM25B // family with sequence similarity 25, member B // 10a1.1                                | FAM25B      | NM_01137556  | 0.000808751   | 0.000808751             | 0.126216              |                             | -7.92295                    | Vk down vs Control          |               | 26.4611 | 21.994   | 6.4697    | 1        |
| 80430    | 804340     | NM_145693    | UPN1 // hemoglobin // 2a2.3 // 23175 // ENST0000025070 // UPN1 // 1                             | UPN1        | NM_145693    | 0.000824594   | 0.000824594             | 0.125617              |                             | -7.96072                    | Vk down vs Control          |               | 27.014  | 21.4979  | 6.30643   | 1        |
| 92743    | 80113756   | NM_01317556  | FAM25B // family with sequence similarity 25, member B // 10a1.1                                | FAM25B      | NM_01317556  | 0.000808751   | 0.000808751             | 0.126216              |                             | -7.92295                    | Vk down vs Control          |               | 26.4611 | 21.994   | 6.4697    | 1        |
| 7823     | 7933327    | NM_01137556  | FAM25B // family with sequence similarity 25, member B // 10a1.1                                | FAM25B      | NM_01137556  | 0.000808751   | 0.000808751             | 0.126216              |                             | -7.92295                    | Vk down vs Control          |               | 26.4611 | 21.994   | 6.4697    | 1        |
| 7834     | 7933423    | NM_01137556  | FAM25B // family with sequence similarity 25, member B // 10a1.1                                | FAM25B      | NM_01137556  | 0.000808751   | 0.000808751             | 0.126216              |                             | -7.92295                    | Vk down vs Control          |               | 26.4611 | 21.994   | 6.4697    | 1        |
| 80430    | 804340     | NM_145693    | UPN1 // hemoglobin // 2a2.3 // 23175 // ENST0000025070 // UPN1 // 1                             | UPN1        | NM_145693    | 0.000824594   | 0.000824594             | 0.125617              |                             | -7.96072                    | Vk down vs Control          |               | 27.014  | 21.4979  | 6.30643   | 1        |
| 92743    | 80113756   | NM_01317556  | FAM25B // family with sequence similarity 25, member B // 10a1.1                                | FAM25B      | NM_01317556  | 0.000808751   | 0.000808751             | 0.126216              |                             | -7.92295                    | Vk down vs Control          |               | 26.4611 | 21.994   | 6.4697    | 1        |
| 7823     | 7933327    | NM_01137556  | FAM25B // family with sequence similarity 25, member B // 10a1.1                                | FAM25B      | NM_01137556  | 0.000808751   | 0.000808751             | 0.126216              |                             | -7.92295                    | Vk down vs Control          |               | 26.4611 | 21.994   | 6.4697    | 1        |
| 7834     | 7933423    | NM_01137556  | FAM25B // family with sequence similarity 25, member B // 10a1.1                                | FAM25B      | NM_01137556  | 0.000808751   | 0.000808751             | 0.126216              |                             | -7.92295                    | Vk down vs Control          |               | 26.4611 | 21.994   | 6.4697    | 1        |
| 80430    | 804340     | NM_145693    | UPN1 // hemoglobin // 2a2.3 // 23175 // ENST0000025070 // UPN1 // 1                             | UPN1        | NM_145693    | 0.000824594   | 0.000824594             | 0.125617              |                             | -7.96072                    | Vk down vs Control          |               | 27.014  | 21.4979  | 6.30643   | 1        |
| 92743    | 80113756   | NM_01317556  | FAM25B // family with sequence similarity 25, member B // 10a1.1                                | FAM25B      | NM_01317556  | 0.000808751   | 0.000808751             | 0.126216              |                             | -7.92295                    | Vk down vs Control          |               | 26.4611 | 21.994   | 6.4697    | 1        |
| 7823     | 7933327    | NM_01137556  | FAM25B // family with sequence similarity 25, member B // 10a1.1                                | FAM25B      | NM_01137556  | 0.000808751   | 0.000808751             | 0.126216              |                             | -7.92295                    | Vk down vs Control          |               | 26.4611 | 21.994   | 6.4697    | 1        |
| 7834     | 7933423    | NM_01137556  | FAM25B // family with sequence similarity 25, member B // 10a1.1                                | FAM25B      | NM_01137556  | 0.000808751   | 0.000808751             | 0.126216              |                             | -7.92295                    | Vk down vs Control          |               | 26.4611 | 21.994   | 6.4697    | 1        |
| 80430    | 804340     | NM_145693    | UPN1 // hemoglobin // 2a2.3 // 23175 // ENST0000025070 // UPN1 // 1                             | UPN1        | NM_145693    | 0.000824594   | 0.000824594             | 0.125617              |                             | -7.96072                    | Vk down vs Control          |               | 27.014  | 21.4979  | 6.30643   | 1        |
| 92743    | 80113756   | NM_01317556  | FAM25B // family with sequence similarity 25, member B // 10a1.1                                | FAM25B      | NM_01317556  | 0.000808751   | 0.000808751             | 0.126216              |                             | -7.92295                    | Vk down vs Control          |               | 26.4611 | 21.994   | 6.4697    | 1        |
| 7823     | 7933327    | NM_01137556  | FAM25B // family with sequence similarity 25, member B // 10a1.1                                | FAM25B      | NM_01137556  | 0.000808751   | 0.000808751             | 0.126216              |                             | -7.92295                    | Vk down vs Control          |               | 26.4611 | 21.994   | 6.4697    | 1        |
| 7834     | 7933423    | NM_01137556  | FAM25B // family with sequence similarity 25, member B // 10a1.1                                | FAM25B      | NM_01137556  | 0.000808751   | 0.000808751             | 0.126216              |                             | -7.92295                    | Vk down vs Control          |               | 26.4611 | 21.994   | 6.4697    | 1        |
| 80430    | 804340     | NM_145693    | UPN1 // hemoglobin // 2a2.3 // 23175 // ENST0000025070 // UPN1 // 1                             | UPN1        | NM_145693    | 0.000824594   | 0.000824594             | 0.125617              |                             | -7.96072                    | Vk down vs Control          |               | 27.014  | 21.4979  | 6.30643   | 1        |
| 92743    | 80113756   | NM_01317556  | FAM25B // family with sequence similarity 25, member B // 10a1.1                                | FAM25B      | NM_01317556  | 0.000808751   | 0.000808751             | 0.126216              |                             | -7.92295                    | Vk down vs Control          |               | 26.4611 | 21.99    |           |          |

| Column # | Transcript | Cluster ID                                                                       | gene_assignment                                                       | Gene Symbol     | RefSeq       | p-value(Gene) | p-value(VA vs Control) | Ratio(VA vs Control) | Fold-Change(VA vs Control) | Fold-Change(VA vs Control) | Description | IGS      | SS(Gene) | SS(Gene) | IF(Rer) |
|----------|------------|----------------------------------------------------------------------------------|-----------------------------------------------------------------------|-----------------|--------------|---------------|------------------------|----------------------|----------------------------|----------------------------|-------------|----------|----------|----------|---------|
| 19607    | 8045229    | NM 032995                                                                        | ARHGFE4 // rho guanine nucleotide exchange factor (GEF) 4 // 2a22 /   | ARHGFE4         | NM 032995    | 0.00341914    | 0.00031914             | 0.312207             | -3.203                     | Vk down vs Control         |             | 16.8423  | 6.7692   | 3.2153   | 1       |
| 9167     | 7941761    | NM 015478                                                                        | RHO // ras homology gene family, member D // 11a13.3 // 29984 // 11   | RHO             | NM 015478    | 0.00133124    | 0.00133124             | 0.313129             | -1.19357                   | Vk down vs Control         |             | 17.4621  | 6.7386   | 2.3276   | 1       |
| 18843    | 8122426    | NM 014721                                                                        | PHACTR2 // phosphatase and actin regulator 2 // 6a24.2 // 9749 // 11  | PHACTR2         | NM 014721    | 0.00105532    | 0.00105532             | 0.313395             | -1.19086                   | Vk down vs Control         |             | 24.981   | 6.7250   | 2.1534   | 1       |
| 27625    | 7971515    | CNCR3 // CNCR3 family member 3 // 154043 // ENST00000200306                      | CNCR3                                                                 | NM 028151       | 0.00105532   | 0.00105532    | 0.313395               | -1.19086             | Vk down vs Control         |                            | 16.6274     | 6.7274   | 2.8932   | 1        |         |
| 13010    | 7983867    | CGNL1 // CGNL1-like family 1 // 15213.3 // 84952 // ENST00000201822 // 11        | CGNL1                                                                 | NM 032866       | 0.00091963   | 0.00091963    | 0.31957                | -1.19291             | Vk down vs Control         |                            | 11.4616     | 6.50076  | 2.4762   | 1        |         |
| 18189    | 8037179    | CMN // CMN // cornifin-like 1 // 19a13.2 // 84518 // ENST00000220231 // CMN      | CMN                                                                   | NM 032488       | 0.00186805   | 0.00186805    | 0.319661               | -1.12831             | Vk down vs Control         |                            | 8.6496      | 6.49749  | 2.00581  | 1        |         |
| 79731    | 811874     | RNASE7 // RNASE7 // ribonuclease, RNase A family 7 // 14a11.2 // 84659 // 11     | RNASE7                                                                | NM 033472       | 0.00111557   | 0.00111557    | 0.322448               | -1.03998             | Vk down vs Control         |                            | 10.57134    | 6.4211   | 2.09518  | 1        |         |
| 62056    | 8120756    | ---                                                                              | ---                                                                   | ---             | ---          | 0.00111557    | 0.00111557             | 0.322448             | -1.03998                   | Vk down vs Control         |             | 10.57134 | 6.4211   | 2.09518  | 1       |
| 5762     | 8052654    | NM 020651                                                                        | PEL1 // eukaryotic homolog 1 (Drosophila) // 2a13.3 // 57162 // ENST  | PEL1            | NM 020651    | 0.00039357    | 0.00039357             | 0.32286              | -0.97371                   | Vk down vs Control         |             | 10.6408  | 6.38453  | 1.83971  | 1       |
| 19323    | 7907847    | ---                                                                              | ---                                                                   | ---             | ---          | 0.00257496    | 0.00257496             | 0.323405             | -3.0921                    | Vk down vs Control         |             | 74.0647  | 6.3651   | 6.82074  | 1       |
| 26901    | 8122368    | SNX9 // sorting nexin 9 // 6a25.1 a26.1 // 51420 // ENST00000391285              | SNX9                                                                  | NM 026234       | 0.00726627   | 0.00726627    | 0.324487               | -1.29295             | Vk down vs Control         |                            | 12.7634     | 6.33212  | 1.96883  | 1        |         |
| 20376    | 8107632    | NM 010405                                                                        | SNX24 // sorting nexin 24 // 5a23.2 // 28966 // ENST00000261369 // 11 | SNX24           | NM 010405    | 0.0118787     | 0.0118787              | 0.324684             | -1.07821                   | Vk down vs Control         |             | 10.4972  | 6.13483  | 4.12729  | 1       |
| 155602   | 810012421  | ANKRD20A2 // ankyrin repeat domain 20 family, member A2 // 9a12                  | ANKRD20A2                                                             | NM 001012421    | 0.0116225    | 0.0116225     | 0.324804               | -1.06365             | Vk down vs Control         |                            | 10.5918     | 6.2617   | 4.87547  | 1        |         |
| 42793    | 8096544    | ENST00000370520 // RP1-93914-6 // hypothetical protein FLJ12154 // 20a13.3 // 11 | RP1-93914-6                                                           | ENST00000370520 | 0.00688477   | 0.00688477    | 0.326255               | -1.06255             | Vk down vs Control         |                            | 10.7029     | 6.2577   | 3.84206  | 1        |         |
| 1550     | 7920297    | NM 020872                                                                        | SNOA14 // small nuclear RNA, H/ACA box 14 // 16a13.3 // 57402 // 11   | SNOA14          | NM 020872    | 0.00168606    | 0.00168606             | 0.326555             | -1.04382                   | Vk down vs Control         |             | 21.4432  | 6.18925  | 2.3908   | 1       |
| 12139    | 7997664    | NR 002327                                                                        | SNOA10 // small nuclear RNA, H/ACA box 10 // 16a13.3 // 57404         | SNOA10          | NR 002327    | 0.0288233     | 0.0288233              | 0.328672             | -1.03225                   | Vk down vs Control         |             | 10.7348  | 6.1863   | 6.99472  | 1       |
| 18627    | 8041204    | NR 002327                                                                        | SNOA10 // small nuclear RNA, H/ACA box 10 // 16a13.3 // 57404         | SNOA10          | NR 002327    | 0.0288233     | 0.0288233              | 0.328672             | -1.03225                   | Vk down vs Control         |             | 10.7348  | 6.1863   | 6.99472  | 1       |
| 16328    | 8019732    | AKO57217                                                                         | TRMP2 // TRMP phosphatase-like domain protein 2 // 17a25 // 703       | AKO57217        | AKO57217     | 0.01321139    | 0.01321139             | 0.329299             | -1.04975                   | Vk down vs Control         |             | 10.0426  | 6.16243  | 4.90971  | 1       |
| 17470    | 8030367    | NM 004605                                                                        | SULT3B1 // sulfotransferase family, cytosolic, 2b, member 1 // 19a1   | SULT3B1         | NM 004605    | 0.00796634    | 0.00796634             | 0.329524             | -1.03468                   | Vk down vs Control         |             | 12.1172  | 6.15587  | 3.99821  | 1       |
| 974762   | 8104580    | ATB2 // ankyrin repeat and BTB (POZ) domain containing 2 // 11p13                | ATB2                                                                  | NM 145894       | 0.0491291    | 0.0491291     | 0.329962               | -1.03065             | Vk down vs Control         |                            | 5.3697      | 6.1414   | 1.94933  | 1        |         |
| 1293     | 7972487    | NM 015296                                                                        | DOCK9 // dedicator of cytokinesis 9 // 33a23.3 // 2348 // NM 0011     | DOCK9           | NM 015296    | 0.00102537    | 0.00102537             | 0.330858             | -1.02245                   | Vk down vs Control         |             | 25.2122  | 6.1116   | 1.93931  | 1       |
| 11543    | 7970372    | NM 003366                                                                        | ANKRD20B // ankyrin repeat domain 20B // 1 // 72b1.1 // NM 00         | ANKRD20B        | NM 003366    | 0.0109162     | 0.0109162              | 0.332284             | -1.00052                   | Vk down vs Control         |             | 10.8667  | 6.0922   | 4.46443  | 1       |
| 1977     | 7962274    | NM 017441                                                                        | NF21A // kinesin family member 21A // 12a12 // 55605 // ENST00000     | NF21A           | NM 017441    | 0.00455419    | 0.00455419             | 0.33289              | -1.00392                   | Vk down vs Control         |             | 15.2093  | 6.04339  | 1.17878  | 1       |
| 14424    | 7999709    | NM 011116                                                                        | ADCY9 // adenylyl cyclase 9 // 16a13.3 // 115 // ENST00000294016      | ADCY9           | NM 011116    | 0.0094459     | 0.0094459              | 0.33328              | -1.00391                   | Vk down vs Control         |             | 11.5183  | 6.04335  | 4.1974   | 1       |
| 22306    | 8078227    | NM 003884                                                                        | KAT2B // kinase II/kinase activator 2B // 18a10 // ENST000            | KAT2B           | NM 003884    | 0.00621858    | 0.00621858             | 0.332905             | -1.00386                   | Vk down vs Control         |             | 13.4249  | 6.04139  | 3.66981  | 1       |
| 2277     | 8031277    | NR 004779                                                                        | LOC10212 // LOC10212 // 16a12.1 // 9813 // 11                         | LOC10212        | NR 004779    | 0.00321179    | 0.00321179             | 0.333037             | -1.00377                   | Vk down vs Control         |             | 17.6123  | 6.0392   | 2.8846   | 1       |
| 4306     | 7901675    | NM 152607                                                                        | LOC10212 // Chromosome 1 open reading frame 17 // 1a23.3 // 163747    | LOC10212        | NM 152607    | 0.033447      | 0.033447               | 0.333447             | -1.99988                   | Vk down vs Control         |             | 16.9602  | 6.0251   | 3.13682  | 1       |
| 5790     | 7902520    | NM 004425                                                                        | ECM1 // extracellular matrix protein 1 // 1a21 // 1893 // NM 0226     | ECM1            | NM 004425    | 0.0024399     | 0.0024399              | 0.333722             | -2.9995                    | Vk down vs Control         |             | 18.9367  | 6.01623  | 5.21487  | 1       |
| 11049    | 7965040    | NM 007450                                                                        | PLCL1 // pleckstrin homology-like domain, family A, member 1 // 12    | PLCL1           | NM 007450    | 0.00155292    | 0.00155292             | 0.334008             | -2.9941                    | Vk down vs Control         |             | 9.37746  | 6.00949  | 1.52863  | 1       |
| 18930    | 8044046    | NM 003854                                                                        | IKZF1 // interferon lambda 1 // 2a12 // 8089 // ENST00000200306       | IKZF1           | NM 003854    | 0.00284192    | 0.00284192             | 0.334192             | -1.99988                   | Vk down vs Control         |             | 13.7423  | 5.9973   | 2.8846   | 1       |
| 20453    | 8097998    | NM 010950                                                                        | USP53 // ubiquitin specific peptidase 53 // 4a26 // 5453 // ENST0     | USP53           | NM 010950    | 0.00175188    | 0.00175188             | 0.335427             | -1.98128                   | Vk down vs Control         |             | 11.4744  | 5.96053  | 2.2598   | 1       |
| 21171    | 8060187    | NM 019854                                                                        | CZorf54 // chromatin specific open reading frame 4 // 2a37.3 // 79919 | CZorf54         | NM 019854    | 0.00524354    | 0.00524354             | 0.33579              | -2.97805                   | Vk down vs Control         |             | 14.433   | 5.94873  | 3.2973   | 1       |
| 12968    | 7983161    | ---                                                                              | ---                                                                   | ---             | ---          | 0.00245622    | 0.00245622             | 0.334487             | -1.29295                   | Vk down vs Control         |             | 12.7634  | 6.33212  | 1.96883  | 1       |
| 2438     | 8098470    | NM 024949                                                                        | WWC2 // WW and C2 domain containing 2 // 4a35.1 // 80014 // ENST0     | WWC2            | NM 024949    | 0.0115268     | 0.0115268              | 0.340044             | -2.93993                   | Vk down vs Control         |             | 10.6278  | 5.89099  | 4.37276  | 1       |
| 793159   | 8191859    | NM 017422                                                                        | CALML5 // calmodulin-like 5 // 10p15.1 // 51806 // ENST00000380332    | CALML5          | NM 017422    | 0.0115908     | 0.0115908              | 0.340244             | -2.92803                   | Vk down vs Control         |             | 10.6037  | 5.76548  | 3.43979  | 1       |
| 10494    | 7959131    | NM 007141                                                                        | CDC64 // coiled-coil domain containing 64 // 12a12.3 // 92558 // 11   | CDC64           | NM 007141    | 0.00308385    | 0.00308385             | 0.342605             | -2.91881                   | Vk down vs Control         |             | 16.6644  | 5.73168  | 2.86629  | 1       |
| 11960    | 7973072    | NM 005194                                                                        | NSD1 // nuclear domain 1 // 16a12.1 // 5683 // ENST00000407031 // PA  | NSD1            | NM 005194    | 0.0034621     | 0.0034621              | 0.343427             | -2.91199                   | Vk down vs Control         |             | 10.6278  | 5.73168  | 2.86629  | 1       |
| 7099     | 8192407    | NM 001004470                                                                     | STR5A6 // STR alpha-N-acetylneuraminidase domain-2.8-sialyltran       | STR5A6          | NM 001004470 | 0.00740692    | 0.00740692             | 0.343473             | -2.91144                   | Vk down vs Control         |             | 12.6655  | 5.70464  | 3.60212  | 1       |
| 86715    | 7942118    | NM 138768                                                                        | MYEOV // myeloma overexpressed (in a subset of t(11;14) positive m    | MYEOV           | NM 138768    | 0.00206261    | 0.00206261             | 0.343521             | -2.91103                   | Vk down vs Control         |             | 18.5221  | 5.70317  | 2.4633   | 1       |
| 16107    | 8021470    | NM 021127                                                                        | MAP1P // phospho-12-methyl-13-acetate-inducible protein 1 // 18a2     | MAP1P           | NM 021127    | 0.0121888     | 0.0121888              | 0.343994             | -2.90703                   | Vk down vs Control         |             | 8.13062  | 5.68847  | 5.61573  | 1       |
| 9886     | 809861     | NM 010428                                                                        | ADP1 // ankyrin domain protein 1 // 16a13.3 // 57402                  | ADP1            | NM 010428    | 0.0041007     | 0.0041007              | 0.344007             | -2.90703                   | Vk down vs Control         |             | 10.6278  | 5.68847  | 5.61573  | 1       |
| 15586    | 8110678    | NM 004623                                                                        | CDC127 // coiled-coil domain containing 127 // 5p15.3 // 133957       | CDC127          | NM 004623    | 0.0132253     | 0.0132253              | 0.344672             | -2.90131                   | Vk down vs Control         |             | 10.0383  | 5.66752  | 4.2503   | 1       |
| 25793    | 8013384    | NM 145691                                                                        | ALDH3A1 // aldehyde dehydrogenase 3 family, member A1 // 17a12.1 //   | ALDH3A1         | NM 145691    | 0.0034253     | 0.0034253              | 0.345257             | -2.89639                   | Vk down vs Control         |             | 9.74187  | 5.6496   | 4.69392  | 1       |
| 17626    | 8176369    | NM 018398                                                                        | ERCC1 // ERCC1 // 16a12.1 // 5683 // ENST00000407031 // PA            | ERCC1           | NM 018398    | 0.00444881    | 0.00444881             | 0.345485             | -1.4689                    | Vk down vs Control         |             | 15.4689  | 5.64238  | 2.96346  | 1       |
| 13528    | 7929567    | NM 138440                                                                        | WASN // wason // 15a13.3 // 114900 // ENST00000340735 // WASN //      | WASN            | NM 138440    | 0.00935301    | 0.00935301             | 0.346482             | -2.88615                   | Vk down vs Control         |             | 13.4659  | 5.61189  | 3.89764  | 1       |
| 15874    | 7907830    | NM 002826                                                                        | GSXL // quiescin Q6 sulfhydryl oxidase 1 // 1a24 // 5768 // 11        | GSXL            | NM 002826    | 0.00627487    | 0.00627487             | 0.347464             | -2.8769                    | Vk down vs Control         |             | 13.9669  | 5.57797  | 3.20621  | 1       |
| 12219    | 7976988    | NM 00108707                                                                      | EML1 // echinoderm microtubule associated protein like 1 // 14a3      | EML1            | NM 00108707  | 0.0134241     | 0.0134241              | 0.348975             | -2.86553                   | Vk down vs Control         |             | 9.97649  | 5.56221  | 4.03924  | 1       |
| 12478    | 7979179    | NM 015484                                                                        | ERCC1 // ERCC1 // 16a12.1 // 5683 // ENST00000407031 // PA            | ERCC1           | NM 015484    | 0.00444881    | 0.00444881             | 0.349249             | -2.86553                   | Vk down vs Control         |             | 15.4689  | 5.64238  | 2.96346  | 1       |
| 18995    | 8057341    | NR 003366                                                                        | ANKRD20B // ankyrin repeat domain 20B // 1 // 72b1.1 // NM 00         | ANKRD20B        | NR 003366    | 0.0289253     | 0.0289253              | 0.350001             | -2.8564                    | Vk down vs Control         |             | 7.30322  | 5.50271  | 6.22762  | 1       |
| 1943     | 8049726    | NM 002374                                                                        | MAP2 // microtubule-associated protein 2 // 2a14-4a5 // 4133 // NM 0  | MAP2            | NM 002374    | 0.0145216     | 0.0145216              | 0.350587             | -2.85236                   | Vk down vs Control         |             | 9.60501  | 5.48788  | 4.54993  | 1       |
| 2973     | 8150076    | NM 001394                                                                        | ADP1 // dual specificity phosphatase 1 // 8a21-01 // 1846 // NM 0226  | ADP1            | NM 001394    | 0.0179221     | 0.0179221              | 0.351187             | -2.84804                   | Vk down vs Control         |             | 11.6262  | 5.47203  | 7.0993   | 1       |
| 16081    | 816021     | NM 190282                                                                        | ANKRD20B // ankyrin repeat domain 20B // 1 // 72b1.1 // NM 00         | ANKRD20B        | NM 190282    | 0.00291217    | 0.00291217             | 0.352919             | -2.71799                   | Vk down vs Control         |             | 14.6654  | 5.49929  | 3.68832  | 1       |
| 1411     | 8165808    | NM 001141919                                                                     | XG // Xg blood group system // Xp22.3 // 7499 // NM 175569 // XG // X | XG              | NM 001141919 | 0.00780416    | 0.00780416             | 0.353736             | -2.79692                   | Vk down vs Control         |             | 12.4161  | 5.28428  | 3.4048   | 1       |
| 28990    | 8143127    | AF358803 // FAM180A // family with sequence similarity 180, member A // 7a3      | FAM180A                                                               | AF358803        | 0.0314496    | 0.0314496     | 0.354969               | -2.77561             | Vk down vs Control         |                            | 6.77786     | 5.20598  | 6.14469  | 1        |         |
| 8146955  | 8146955    | ---                                                                              | ---                                                                   | ---             | ---          | 0.000267107   | 0.000267107            | 0.361402             | -2.767                     | Vk down vs Control         |             | 38.0993  | 5.17344  | 1.08621  | 1       |
| 1804     | 7904466    | NM 005555                                                                        | KRT6B // keratin 6b // 12a12-03 // 3854 // ENST0000025252 // KRT      |                 |              |               |                        |                      |                            |                            |             |          |          |          |         |

| Column # | Transcript                                                                        | Cluster ID                                                                               | gene_assignment                                                              | Gene Symbol | RefSeq     | p-value(Gene) | p-value(VA vs. Control) | Ratio(VA vs. Control) | Fold-Change(VA vs. Control) | Fold-Change(VA vs. Control) | Fold-Change(VA vs. Control) | (Description) | (fGene) | (SSGene) | (SSError) | (fError) |  |
|----------|-----------------------------------------------------------------------------------|------------------------------------------------------------------------------------------|------------------------------------------------------------------------------|-------------|------------|---------------|-------------------------|-----------------------|-----------------------------|-----------------------------|-----------------------------|---------------|---------|----------|-----------|----------|--|
| 19595    | 890519                                                                            | NM_006277                                                                                | ITSN2 // ITSN2 // intersectin 2 // 2pter-q25.1 // 90616 // NM_019595 // IT13 | ITSN2       | NM_006277  | 0.0100184     | 0.0100194               | 0.430604              | -2.3222                     | VN down vs Control          | 11.2499                     | 5.4624        | 2.5218  |          |           |          |  |
| 23809    | 8093974                                                                           | ---                                                                                      | ---                                                                          | ---         | ---        | 0.0011782     | 0.0011782               | 0.43123               | -2.3194                     | VN down vs Control          | 21.4125                     | 3.5343        | 1.17262 |          |           |          |  |
| 803893   | NM_00713                                                                          | BURB // biliverdin reductase B (flavin reductase (NADPH)) // IT13                        | BURB                                                                         | NM_00713    | 0.0262854  | 0.0262854     | 0.431487                | -2.3177               | VN down vs Control          | 7.8955                      | 3.52902                     | 3.01851       |         |          |           |          |  |
| 22395    | 8079140                                                                           | NM_01719                                                                                 | SNF1-related kinase 2 // 15q21.1 // 5486 // NM_0103959 // S                  | SNF1        | NM_01719   | 0.0015249     | 0.0015249               | 0.43162               | -2.317                      | VN down vs Control          | 18.5747                     | 3.5266        | 1.17262 |          |           |          |  |
| 17670    | 8130803                                                                           | AK12120 // L0C01286 // hypothetical LOC401286 // 6q21 // 401286 // ENST000003            | LOC401286                                                                    | AK12120     | 0.0162537  | 0.0162537     | 0.433391                | -2.3079               | VN down vs Control          | 9.19453                     | 3.49215                     | 3.03846       |         |          |           |          |  |
| 133076   | 8130976                                                                           | AK12120 // L0C01286 // hypothetical LOC401286 // 6q21 // 401286 // ENST000003            | LOC401286                                                                    | AK12120     | 0.0162537  | 0.0162537     | 0.433391                | -2.3079               | VN down vs Control          | 9.19453                     | 3.49215                     | 3.03846       |         |          |           |          |  |
| 4758     | 8020016                                                                           | LOC100136 // hypothetical LOC100136 // 11p15.5 // 5187 // EN                             | LOC100136                                                                    | 8020016     | 0.0084064  | 0.0084064     | 0.433641                | -2.3079               | VN down vs Control          | 6.85613                     | 3.47772                     | 3.01851       |         |          |           |          |  |
| 12667    | 7966839                                                                           | NM_019086 // LOC100136 // hypothetical LOC100136 // 11p15.5 // 5187 // EN                | LOC100136                                                                    | NM_019086   | 0.0083203  | 0.0083203     | 0.434361                | -2.3075               | VN down vs Control          | 12.1101                     | 3.46813                     | 3.02046       |         |          |           |          |  |
| 13369    | 7988812                                                                           | NM_015347 // TMEM86A // transmembrane protein 86A // 11p15.1 // 144110 // ENST0          | TMEM86A                                                                      | NM_015347   | 0.00714495 | 0.00714495    | 0.434986                | -2.2989               | VN down vs Control          | 12.8642                     | 3.46153                     | 3.15568       |         |          |           |          |  |
| 83466    | 7987180                                                                           | NM_024713 // C15orf29 // chromosome 15 open reading frame 29 // 15q14 // 79768 //        | C15orf29                                                                     | NM_024713   | 0.00714495 | 0.00714495    | 0.437024                | -2.2882               | VN down vs Control          | 16.1122                     | 3.42277                     | 3.07862       |         |          |           |          |  |
| 1568     | 8012349                                                                           | NM_02516 // PRL1 // period homolog 1 (Drosophila) // 17q11.1 // 42 // 5187 // EN         | PRL1                                                                         | NM_02516    | 0.0126263  | 0.0126263     | 0.437024                | -2.2979               | VN down vs Control          | 6.29232                     | 3.42178                     | 3.07945       |         |          |           |          |  |
| 17768    | 8032804                                                                           | NM_030025 // SH3GL1 // SH3 domain GRB2-like 1 // 19p13.3 // 6455 // ENST0000026          | SH3GL1                                                                       | NM_030025   | 0.0120461  | 0.0120461     | 0.437171                | -2.2873               | VN down vs Control          | 10.4168                     | 3.41997                     | 2.62147       |         |          |           |          |  |
| 4059854  | NM_05737                                                                          | ARLAC // ADP-ribosylation factor-like 4C // 2q37.1 // 10123 // ENS                       | ARLAC                                                                        | NM_05737    | 0.0119385  | 0.0119385     | 0.437488                | -2.2857               | VN down vs Control          | 10.4755                     | 3.41398                     | 2.62147       |         |          |           |          |  |
| 4199     | 898725                                                                            | ---                                                                                      | ---                                                                          | ---         | ---        | 0.0213948     | 0.0213948               | 0.437955              | -2.2834                     | VN down vs Control          | 8.17078                     | 3.40557       | 3.3482  |          |           |          |  |
| 8196     | 7937443                                                                           | NM_027772 // PPS2B // PPS2-like 2 // 11p15.5 // 64787 // ENST00000318562 // EP           | PPS2B                                                                        | NM_027772   | 0.0004676  | 0.0004676     | 0.437978                | -2.2832               | VN down vs Control          | 15.0415                     | 3.40475                     | 3.18085       |         |          |           |          |  |
| 15058    | 8005638                                                                           | NM_010330 // ALDH3A2 // aldehyde dehydrogenase 3 family, member A2 // 17q11.1            | ALDH3A2                                                                      | NM_010330   | 0.0024486  | 0.0024486     | 0.438                   | -2.2814               | VN down vs Control          | 14.8317                     | 3.3987                      | 3.14756       |         |          |           |          |  |
| 13447    | 7985851                                                                           | NM_014701 // SEC5BP2 // SEC5 binding protein 2-like // 15q21.1 // 9728 // EN             | SEC5BP2                                                                      | NM_014701   | 0.0149586  | 0.0149586     | 0.438408                | -2.2808               | VN down vs Control          | 9.52923                     | 3.39667                     | 2.85158       |         |          |           |          |  |
| 8044031  | NM_023016 // ANKRD57 // ankyrin repeat domain 57 // 2q13 // 65124 // ENST000003   | ANKRD57                                                                                  | NM_023016                                                                    | 0.0009388   | 0.0009388  | 0.438577      | -2.2798                 | VN down vs Control    | 11.6984                     | 3.3916                      | 3.13936                     |               |         |          |           |          |  |
| 789479   | ---                                                                               | ---                                                                                      | ---                                                                          | ---         | ---        | 0.0009388     | 0.0009388               | 0.438577              | -2.2798                     | VN down vs Control          | 11.6984                     | 3.3916        | 3.13936 |          |           |          |  |
| 8103     | 7936463                                                                           | NM_020313 // ABLM1 // actin binding LIM protein 1 // 10q25 // 3983 // NM_00100           | ABLM1                                                                        | NM_020313   | 0.0008659  | 0.0008659     | 0.439463                | -2.2751               | VN down vs Control          | 7.26117                     | 3.3769                      | 3.10164       |         |          |           |          |  |
| 8354     | 7938687                                                                           | NM_05113 // NUCB2 // nucleobindin 2 // 11q15.1 // 4925 // ENST0000032888                 | NUCB2                                                                        | NM_05113    | 0.0277991  | 0.0277991     | 0.439664                | -2.2747               | VN down vs Control          | 26.019                      | 3.37314                     | 3.74694       |         |          |           |          |  |
| 7528     | 7930276                                                                           | NM_014720 // SKL1 // STK20-like kinase (yeast) // 10q24.3 // 9748 // ENST000003          | SKL                                                                          | NM_014720   | 0.0013564  | 0.0013564     | 0.440003                | -2.2729               | VN down vs Control          | 13.249                      | 3.36682                     | 3.16765       |         |          |           |          |  |
| 12740    | 8027604                                                                           | NM_014686 // KIAA0355 // KIAA0355 // 19q13.11 // 9710 // ENST00000299505 // KIA          | KIAA0355                                                                     | NM_014686   | 0.00914832 | 0.00914832    | 0.440609                | -2.2699               | VN down vs Control          | 11.6657                     | 3.3554                      | 3.20112       |         |          |           |          |  |
| 2896     | 8114120                                                                           | NM_05221 // DUX5 // distal-less homolog 5 // 7q22 // 1749 // ENST0000022598              | DUX5                                                                         | NM_05221    | 0.042318   | 0.042318      | 0.442354                | -2.2603               | VN down vs Control          | 5.81366                     | 3.32025                     | 4.5703        |         |          |           |          |  |
| 1920     | 7952249                                                                           | NM_04025 // USP2 // ubiquitin specific peptidase 2 // 11q23 // 9099 // NM_17             | USP2                                                                         | NM_04025    | 0.048928   | 0.048928      | 0.442487                | -2.2595               | VN down vs Control          | 5.41462                     | 3.3208                      | 4.90245       |         |          |           |          |  |
| 8036812  | NM_02307                                                                          | GCAL57 // lectin, galactose-binding, soluble 7 // 19q13.2 // 398                         | GCAL57                                                                       | NM_02307    | 0.0042307  | 0.0042307     | 0.442732                | -2.2574               | VN down vs Control          | 10.4714                     | 3.3157                      | 3.27242       |         |          |           |          |  |
| 81627    | 8163149                                                                           | NM_02829 // PTPN3 // protein tyrosine phosphatase, non-receptor type 3 // 9q31           | PTPN3                                                                        | NM_02829    | 0.0114674  | 0.0114674     | 0.443006                | -2.2575               | VN down vs Control          | 10.6503                     | 3.31126                     | 4.90245       |         |          |           |          |  |
| 19340    | 8047854                                                                           | NM_01142300 // CENPL // cyclin Y-like 1 // 2q33.3 // 151195 // NM_152523 // C            | CENPL                                                                        | NM_01142300 | 0.0013624  | 0.0013624     | 0.443539                | -2.2549               | VN down vs Control          | 19.9517                     | 3.30148                     | 4.66373       |         |          |           |          |  |
| 8018579  | NM_01988                                                                          | EVL // evoviolanin // 7q25 // 2125 // ENST00000301007 // EVL //                          | EVL                                                                          | NM_01988    | 0.0027902  | 0.0027902     | 0.444393                | -2.2506               | VN down vs Control          | 18.0624                     | 3.28588                     | 3.5573        |         |          |           |          |  |
| 12092    | 807541                                                                            | LOC100136 // hypothetical LOC100136 // 11p15.5 // 5187 // EN                             | LOC100136                                                                    | 807541      | 0.0027902  | 0.0027902     | 0.444393                | -2.2506               | VN down vs Control          | 18.0624                     | 3.28588                     | 3.5573        |         |          |           |          |  |
| 18233    | 8034909                                                                           | NM_02518 // NPAS2 // neuronal PAS domain protein 2 // 2q12.1 // 4822 // ENST0            | NPAS2                                                                        | NM_02518    | 0.019037   | 0.019037      | 0.445683                | -2.2475               | VN down vs Control          | 8.57708                     | 3.26243                     | 3.04764       |         |          |           |          |  |
| 28920    | 8038390                                                                           | NM_00882 // IL12A // interleukin 12 (natural killer cell stimulatory factor 1,           | IL12A                                                                        | NM_00882    | 0.0259094  | 0.0259094     | 0.447021                | -2.2370               | VN down vs Control          | 7.55803                     | 3.23828                     | 3.42724       |         |          |           |          |  |
| 20114    | 805568                                                                            | NM_02159 // C22orf41 // chromosome 22 open reading frame 41 // 19q13.1 // 5885 //        | C22orf41                                                                     | NM_02159    | 0.047021   | 0.047021      | 0.447021                | -2.2368               | VN down vs Control          | 10.4745                     | 3.23772                     | 4.06292       |         |          |           |          |  |
| 24730    | 8102518                                                                           | NM_00101701 // C6orf3 // chromosome 4 open reading frame 3 // 4q26 // 401512 //          | C6orf3                                                                       | NM_00101701 | 0.0113787  | 0.0113787     | 0.447125                | -2.2365               | VN down vs Control          | 10.6842                     | 3.2364                      | 2.42331       |         |          |           |          |  |
| 9009     | 7944931                                                                           | NM_198277 // SLC37A2 // solute carrier family 37 (dyeroid-3-phosphate transport          | SLC37A2                                                                      | NM_198277   | 0.0253207  | 0.0253207     | 0.4476                  | -2.2344               | VN down vs Control          | 7.52556                     | 3.22788                     | 3.43138       |         |          |           |          |  |
| 1910     | 7936439                                                                           | NM_00101936 // ARAF1 // aryl hydrocarbon receptor associated protein 1-like 2 // 10q25.3 | ARAF1                                                                        | NM_00101936 | 0.0079925  | 0.0079925     | 0.447771                | -2.2329               | VN down vs Control          | 12.3015                     | 3.22481                     | 2.97818       |         |          |           |          |  |
| 5103     | 8195485                                                                           | NM_03125 // SPRB1 // small proline-rich protein 18 (cornifin) // 1q21-q21.1 // 6         | SPRB1                                                                        | NM_03125    | 0.0478343  | 0.0478343     | 0.448143                | -2.2329               | VN down vs Control          | 6.19335                     | 3.22292                     | 3.19345       |         |          |           |          |  |
| 28884    | 8122856                                                                           | ---                                                                                      | ---                                                                          | ---         | ---        | 0.0124517     | 0.0124517               | 0.448072              | -2.2317                     | VN down vs Control          | 10.4722                     | 3.2194        | 2.5018  |          |           |          |  |
| 8035     | 8155048                                                                           | NM_01806 // RUSC2 // RUN and SH3 domain containing 2 // 9q13.3 // 9853 // NM_0           | RUSC2                                                                        | NM_01806    | 0.012259   | 0.012259      | 0.44932                 | -2.2254               | VN down vs Control          | 7.9079                      | 3.19648                     | 3.22193       |         |          |           |          |  |
| 792020   | NM_05891                                                                          | PCVPR9 // phosphatidylinositol recognition protein 9 // 1q21 // 14774 //                 | PCVPR9                                                                       | NM_05891    | 0.0113322  | 0.0113322     | 0.44957                 | -2.2259               | VN down vs Control          | 10.7833                     | 3.19537                     | 3.27127       |         |          |           |          |  |
| 929747   | NM_024951                                                                         | DFEF6 // zinc finger protein 365 // 10q21.1 // 2398 // NM_190453                         | DFEF6                                                                        | NM_024951   | 0.004965   | 0.004965      | 0.450243                | -2.2243               | VN down vs Control          | 10.243                      | 3.19322                     | 3.22322       |         |          |           |          |  |
| 44691    | 7901497                                                                           | NM_01004339 // ZYG11A // zyg-11 homolog (C. elegans) // 1q23.3 // 40590 // S             | ZYG11A                                                                       | NM_01004339 | 0.0054851  | 0.0054851     | 0.449642                | -2.2240               | VN down vs Control          | 14.1947                     | 3.19159                     | 3.79873       |         |          |           |          |  |
| 24885    | 8100231                                                                           | NM_03215 // TCC1 // test protein tyrosine kinase // 4p12 // 7006 // ENST00000381         | TCC1                                                                         | NM_03215    | 0.016102   | 0.016102      | 0.449899                | -2.2228               | VN down vs Control          | 9.25334                     | 3.1826                      | 2.75383       |         |          |           |          |  |
| 5881     | 8013258                                                                           | NM_022841 // IZ2F41 // interdigitin 22 receptor, alpha 1 // 19q13.1 // 5885 //           | IZ2F41                                                                       | NM_022841   | 0.0121289  | 0.0121289     | 0.45077                 | -2.2228               | VN down vs Control          | 6.85095                     | 3.17144                     | 2.8212        |         |          |           |          |  |
| 31061    | 8164217                                                                           | NM_028283 // FAM129B // family with sequence similarity 129, member B // 9q33.3          | FAM129B                                                                      | NM_028283   | 0.0147105  | 0.0147105     | 0.451558                | -2.2146               | VN down vs Control          | 9.95754                     | 3.15858                     | 2.63318       |         |          |           |          |  |
| 8152453  | NM_014112 // TRPS1 // trichorhinalphalangecty syndrome 1 // 8q24.12 // 7227 // EN | TRPS1                                                                                    | NM_014112                                                                    | 0.0072574   | 0.0072574  | 0.451656      | -2.2147                 | VN down vs Control    | 12.7693                     | 3.15583                     | 3.9713                      |               |         |          |           |          |  |
| 8005469  | NM_01004272 // ABHD12 // abhydrolase domain containing 12 // 20p12.1 // 26900     | ABHD12                                                                                   | NM_01004272                                                                  | 0.00335833  | 0.00335833 | 0.451989      | -2.2124                 | VN down vs Control    | 16.6495                     | 3.14998                     | 3.48678                     |               |         |          |           |          |  |
| 277      | 8131475                                                                           | NM_02516 // C12orf41 // chromosome 12 open reading frame 41 // 12q13.1 // 200            | C12orf41                                                                     | NM_02516    | 0.0026461  | 0.0026461     | 0.452086                | -2.2123               | VN down vs Control          | 10.123                      | 3.14806                     | 3.14806       |         |          |           |          |  |
| 1005     | 7954527                                                                           | NM_001813 // ARNTL2 // aryl hydrocarbon receptor nuclear translocator-like 2 //          | ARNTL2                                                                       | NM_001813   | 0.011428   | 0.011428      | 0.452068                | -2.2106               | VN down vs Control          | 16.9643                     | 3.1466                      | 3.16714       |         |          |           |          |  |
| 31061    | 8165334                                                                           | NM_004669 // CLIC3 // chloride intracellular channel 3 // 9q34.3 // 9022 // ENS          | CLIC3                                                                        | NM_004669   | 0.0207266  | 0.0207266     | 0.452193                | -2.2115               | VN down vs Control          | 8.25532                     | 3.14641                     | 3.90491       |         |          |           |          |  |
| 27999    | 8133176                                                                           | NM_015404 // RABGF1 // RAB guanine nucleotide exchange factor (GEP) 1 // 7q11.2          | RABGF1                                                                       | NM_015404   | 0.00540897 | 0.00540897    | 0.452474                | -2.2107               | VN down vs Control          | 14.268                      | 3.1447                      | 3.74161       |         |          |           |          |  |
| 26912    | 8014200                                                                           | NM_024040 // RAB11B // Rab11 protein, cytosolic (ribonucleoside triphosphate-de          | RAB11B                                                                       | NM_024040   | 0.0029676  | 0.0029676     | 0.452676                | -2.2107               | VN down vs Control          | 10.4734                     | 3.1318                      | 3.90028       |         |          |           |          |  |
| 15317    | 8007976                                                                           | NM_006310 // NPEPP3 // aminopeptidase puromycin sensitive // 17q21 // 9520 // I          | NPEPP3                                                                       | NM_006310   | 0.00533691 | 0.00533691    | 0.453252                | -2.2028               | VN down vs Control          | 14.3391                     | 3.12788                     | 3.74161       |         |          |           |          |  |
| 21231    | 8076233                                                                           | NM_06139 // SNORD43 // small nuclear RNA, C/D box 43 // 21q13 // 28807 // I              | SNORD43                                                                      | NM_06139    | 0.00800263 | 0.00800263    | 0.453454                | -2.2053               | VN down vs Control          | 12.9255                     | 3.12437                     | 2.02286       |         |          |           |          |  |
| 21759    | 8072539                                                                           | NR_024914 // TOM1 // target of mitl (chicken) // 22q13.1 // 10044 // NM_05488            | TOM1                                                                         | NR_024914   | 0.0066943  | 0.0066943     | 0.453549                | -2.2043               | VN down vs Control          | 11.17                       | 3.1227                      | 3.86869       |         |          |           |          |  |
| 7990     | 8005834                                                                           | NM_02889 // SHROOM3 // shroom family protein 3 // 4q21.1 // 5769 // ENST000002           | SHROOM                                                                       |             |            |               |                         |                       |                             |                             |                             |               |         |          |           |          |  |

| Column # | Transcript | Cluster ID                                                                           | gene_assignment                                                                            | Gene Symbol | RefSeq      | p-value(Gene) | p-value(VA vs Control) | Ratio(VA vs Control) | Fold-Change(VA vs Control) | Fold-Change(VA vs Control) | Description | (fGene) | (SSGene) | (SEError) | (fError) |
|----------|------------|--------------------------------------------------------------------------------------|--------------------------------------------------------------------------------------------|-------------|-------------|---------------|------------------------|----------------------|----------------------------|----------------------------|-------------|---------|----------|-----------|----------|
| 1144     | 7966035    | NM_006825                                                                            | CKAP4 // cytoskeleton-associated protein 4 [12a32.3] / 10970 [10]                          | CKAP4       | NM_006825   | 0.00425317    | 0.00425317             | 0.490825             | -2.03739                   | VM down vs Control         | 15.2362     | 2.52997 | 1.92844  | 1         |          |
| 21658    | 8071649    | BC043345                                                                             | BMS1 // BMS1 homolog, ribosome assembly protein (yeast) // 10q11.21                        | BMS1        | BC043345    | 0.00176906    | 0.00176906             | 0.491267             | -2.03555                   | VM down vs Control         | 21.1057     | 2.52357 | 3.05644  | 1         |          |
| 26144    | 8115918    | nm_007067                                                                            | CLTB // clathrin, light chain (Lc3) // 4q24-q31S6p3 // 12q11 [NM 007067]                   | CLTB        | nm_007067   | 0.00871037    | 0.00871037             | 0.482573             | -2.03515                   | VM down vs Control         | 11.6544     | 2.50475 | 1.71957  | 1         |          |
| 29849    | 8150575    | U04781                                                                               | RLC1 // RLC1-inducible coiled-coil 1 // 8q21.31-q11.4 // 12q10.2                           | RLC1        | U04781      | 0.00427171    | 0.00427171             | 0.482877             | -2.03515                   | VM down vs Control         | 7.60529     | 2.48271 | 1.61338  | 1         |          |
| 24546    | 8100655    | nm_000496                                                                            | GNRH1R // gonadotropin-releasing hormone receptor // 4q21.12 // 2798                       | GNRH1R      | nm_000496   | 0.0124669     | 0.0124669              | 0.483606             | -2.02991                   | VM down vs Control         | 10.2895     | 2.48996 | 1.93593  | 1         |          |
| 22396    | 8079149    | ---                                                                                  | ---                                                                                        | ---         | ---         | 0.0184549     | 0.0184549              | 0.483983             | -2.02497                   | VM down vs Control         | 8.86639     | 2.48671 | 2.28758  | 1         |          |
| 22112    | 8078273    | NM_005106                                                                            | NR1D2 // nuclear receptor subfamily 1, group D, member 2 // 3q24.2                         | NR1D2       | NM_005106   | 0.00176544    | 0.00176544             | 0.484078             | -2.02739                   | VM down vs Control         | 7.60529     | 2.48271 | 1.61338  | 1         |          |
| 1728     | 7927280    | NM_005972                                                                            | PPYR1 // pancreatic polypeptide receptor 1 // 10q11.2 // 5540 [1]                          | PPYR1       | NM_005972   | 0.0205353     | 0.0205353              | 0.484501             | -2.02224                   | VM down vs Control         | 8.29006     | 2.47719 | 2.30052  | 1         |          |
| 9228     | 8046726    | NM_00130445                                                                          | SFS2 // sperm specific antigen 2 // 2a3.3 / 6744 [1] / NM 00675                            | SFS2        | NM_00130445 | 0.0010882     | 0.0010882              | 0.484564             | -2.02198                   | VM down vs Control         | 24.7766     | 2.47629 | 8.80852  | 1         |          |
| 18347    | 808774     | 1A4055                                                                               | NR1H3 // nuclear receptor subfamily 1, group D, member 3 // 12q10.2                        | NR1H3       | 1A4055      | 0.00502168    | 0.00502168             | 0.485028             | -2.02019                   | VM down vs Control         | 5.9206      | 2.47004 | 3.3505   | 1         |          |
| 10485    | 7959070    | NM_002567                                                                            | PEBP1 // phosphatidylethanolamine binding protein 1 // 12q24.23 [1]                        | PEBP1       | NM_002567   | 0.020314      | 0.020314               | 0.486796             | -2.01929                   | VM down vs Control         | 8.30375     | 2.44473 | 2.34767  | 1         |          |
| 9068     | 7945503    | U01088                                                                               | DEAF1 // deformed epidermal autoregulatory factor 1 (Drosophila) [1]                       | DEAF1       | U01088      | 0.0291426     | 0.0291426              | 0.496872             | -2.01259                   | VM down vs Control         | 7.5828      | 2.44366 | 2.77856  | 1         |          |
| 1271     | 7893774    | ---                                                                                  | ---                                                                                        | ---         | ---         | 0.00636051    | 0.00636051             | 0.497108             | -2.01163                   | VM down vs Control         | 13.6952     | 2.44034 | 1.42551  | 1         |          |
| 26857    | 8122343    | NM_016217                                                                            | HECA // heparanase (lysosomal) [1] 6q23-q24 // 5196 // ENST                                | HECA        | NM_016217   | 0.00134627    | 0.00134627             | 0.497966             | -2.00817                   | VM down vs Control         | 9.95759     | 2.42881 | 1.9474   | 1         |          |
| 15223    | 7979698    | NM_015994                                                                            | ATP5V1 // ATPase, H+ transporting, lysosomal 340Da, V1 subunit D [1]                       | ATP5V1      | NM_015994   | 0.0181552     | 0.0181552              | 0.498611             | -2.00557                   | VM down vs Control         | 8.75967     | 2.4193  | 2.20949  | 1         |          |
| 16473    | 8020183    | NM_014214                                                                            | IMPA2 // inositol(1-myo)-1-or-4-monomethylphosphate 2 // 18p11.2 // 3613                   | IMPA2       | NM_014214   | 0.00902053    | 0.00902053             | 0.498838             | -2.00466                   | VM down vs Control         | 11.7309     | 2.41614 | 1.6477   | 1         |          |
| 8071651  | 004327     | BCR // BCR // immunoglobulin constant region // 22q11.22q11.23 // 11q23 [1] / NM 021 | BCR                                                                                        | NM_004327   | 0.01247498  | 0.01247498    | 0.499298               | -2.00288             | VM down vs Control         | 10.0251                    | 2.40974     | 1.97436 | 1        |           |          |
| 30301    | 8154872    | NM_016825                                                                            | UBAP1 // ubiquitin associated protein 1 // 9q13.3 // 52173 [ENST]                          | UBAP1       | NM_016825   | 0.01305243    | 0.01305243             | 0.499524             | -2.00003                   | VM down vs Control         | 10.0684     | 2.40105 | 1.90276  | 1         |          |
| 20255    | 8057744    | NM_007115                                                                            | STAT1 // signal transducer and activator of transcription 1, 91kDa                         | STAT1       | NM_007115   | 0.01823       | 0.01823                | 0.50179              | -2.0019                    | VM up vs Control           | 8.74377     | 2.40658 | 2.20187  | 1         |          |
| 30881    | 8160146    | NM_00101915                                                                          | PTRFAD2 // protein tyrosine phosphatase-like A domain containing                           | PTRFAD2     | NM_00101915 | 0.0431518     | 0.0431518              | 0.502028             | -2.00008                   | VM up vs Control           | 2.76178     | 2.40721 | 1.34421  | 1         |          |
| 92164    | 7947378    | NM_002725                                                                            | FANCF // Fanconi anemia, complementation group F // 11p15.1 // 2188 [1]                    | FANCF       | NM_002725   | 0.0425027     | 0.0425027              | 0.503                | -2.002                     | VM up vs Control           | 5.8085      | 2.40939 | 3.35051  | 1         |          |
| 559      | 7893061    | ---                                                                                  | ---                                                                                        | ---         | ---         | 0.0383688     | 0.0383688              | 0.50328              | -2.00328                   | VM up vs Control           | 6.12902     | 2.4115  | 1.34745  | 1         |          |
| 10266    | 7956613    | NM_005981                                                                            | TSPAN31 // tetraspanin 31 // 12q13.3 // 6302 [1] / ENST00000257910 [1]                     | TSPAN31     | NM_005981   | 0.00654914    | 0.00654914             | 0.500428             | -2.00405                   | VM up vs Control           | 13.2901     | 2.41402 | 1.45421  | 1         |          |
| 30326    | 8155192    | NM_021343                                                                            | GLP2R // Glu2-pituitary-related 2 // 9p13-p12 // 152007 [1] / NM 021343                    | GLP2R       | NM_021343   | 0.0287269     | 0.0287269              | 0.500462             | -2.00462                   | VM up vs Control           | 7.08497     | 2.41401 | 2.72804  | 1         |          |
| 1111     | 7966049    | NM_011423                                                                            | MLML1 // chromatin-like factor 1 // 12q24.1 // 1240 [1] / NM 02183                         | MLML1       | NM_011423   | 0.005607      | 0.005607               | 0.500507             | -2.00507                   | VM up vs Control           | 7.42822     | 2.41755 | 1.67387  | 1         |          |
| 30304    | 8180078    | NM_002118                                                                            | HMB-DMB // major histocompatibility complex, class II, DM beta [1] / 6                     | HMB-DMB     | NM_002118   | 0.0268575     | 0.0268575              | 0.500511             | -2.00531                   | VM up vs Control           | 7.31803     | 2.41839 | 2.64375  | 1         |          |
| 3867     | 8178188    | NR_001329                                                                            | RNF5P1 // ring finger protein 5 pseudogene 1 // 10p11.2 // 286140 [1]                      | RNF5P1      | NR_001329   | 0.00011231    | 0.00011231             | 0.500554             | -2.00554                   | VM up vs Control           | 44.1888     | 2.4192  | 4.037975 | 1         |          |
| 384      | 7892884    | ---                                                                                  | ---                                                                                        | ---         | ---         | 0.0250106     | 0.0250106              | 0.50056              | -2.00556                   | VM up vs Control           | 7.58937     | 2.41925 | 2.55689  | 1         |          |
| 8071652  | 001834     | RNF130 // ring finger protein 130 // 5a3.5 // 55815 [1] / ENST000002                 | RNF130                                                                                     | NM_01834    | 0.001424    | 0.001424      | 0.50072                | -2.00726             | VM up vs Control           | 2.0079                     | 2.42094     | 2.79642 | 1        |           |          |
| 13400    | 7969081    | NM_201524                                                                            | GRP56 // G-protein-coupled receptor 56 // 16q12.2-q21 // 9289 [1] / NM 201524              | GRP56       | NM_201524   | 0.0269424     | 0.0269424              | 0.50059              | -2.00959                   | VM up vs Control           | 7.30701     | 2.42326 | 2.66402  | 1         |          |
| 24304    | 8088848    | NM_015009                                                                            | P2X domain containing ring finger 3 // 3q13 // 23024 [1]                                   | P2XDN3      | NM_015009   | 0.0348187     | 0.0348187              | 0.501199             | -2.01199                   | VM up vs Control           | 6.50183     | 2.44156 | 3.00415  | 1         |          |
| 8125239  | 002118     | HMB-DMB // major histocompatibility complex, class II, DM beta [1] / 6               | HMB-DMB                                                                                    | NM_002118   | 0.0268575   | 0.0268575     | 0.500511               | -2.00531             | VM up vs Control           | 7.31803                    | 2.41839     | 2.64375 | 1        |           |          |
| 6664     | 7921637    | NM_003874                                                                            | CDB4 // CDB4 molecule // 1q24 // 882 [1] / ENST00000380524 // CDB4                         | CDB4        | NM_003874   | 0.024248      | 0.024248               | 0.501506             | -2.01506                   | VM up vs Control           | 8.39112     | 2.45224 | 2.14263  | 1         |          |
| 11073    | 7956335    | NM_001946                                                                            | DUSP6 // dual specificity phosphatase 6 // 12q22-q23 // 1848 [1] / NM 1946                 | DUSP6       | NM_001946   | 0.0157361     | 0.0157361              | 0.50155              | -2.0155                    | VM up vs Control           | 9.32414     | 2.45375 | 2.1029   | 1         |          |
| 1756     | 7894264    | ---                                                                                  | ---                                                                                        | ---         | ---         | 0.00219407    | 0.00219407             | 0.501972             | -2.01782                   | VM up vs Control           | 19.6338     | 2.46181 | 1.90309  | 1         |          |
| 10814    | 7962174    | 15320                                                                                | ZNF41 // zinc finger protein 41 // 12q13.31 // 121274 [1] / ENST000                        | ZNF41       | 15320       | 0.0012947     | 0.0012947              | 0.501913             | -2.01913                   | VM up vs Control           | 2.00923     | 2.46388 | 1.90309  | 1         |          |
| 14922    | 800184     | NM_017523                                                                            | XAF1 // XAP associated factor 1 // 17p13.1 // 54739 [1] / NM 17523                         | XAF1        | NM_017523   | 0.0206948     | 0.0206948              | 0.501975             | -2.01975                   | VM up vs Control           | 8.21066     | 2.46853 | 2.30052  | 1         |          |
| 20617    | 8061564    | NM_181353                                                                            | HD1 // inhibitor of DNA binding 1, dominant negative helix-loop-hel                        | HD1         | NM_181353   | 0.0118244     | 0.0118244              | 0.50218              | -2.02238                   | VM up vs Control           | 10.157      | 2.47769 | 1.88471  | 1         |          |
| 1814010  | 002198     | HMB-DMB // major histocompatibility complex, class II, DM beta [1] / 6               | HMB-DMB                                                                                    | NM_002198   | 0.0268575   | 0.0268575     | 0.500511               | -2.00531             | VM up vs Control           | 7.31803                    | 2.41839     | 2.64375 | 1        |           |          |
| 7969189  | 001870     | ORAM1 // ORN domain related autophagy modulator 1 // 12q24.1 // 59                   | ORAM1                                                                                      | 1870        | 0.001423    | 0.001423      | 0.502474               | -2.02474             | VM up vs Control           | 1.8784                     | 2.47964     | 1.97169 | 1        |           |          |
| 29769    | 8150014    | NM_018250                                                                            | INTS9 // integrator complex subunit 9 // 8q21.1 // 55756 // NM 001                         | INTS9       | NM_018250   | 0.0215555     | 0.0215555              | 0.502509             | -2.02509                   | VM up vs Control           | 8.57933     | 2.48709 | 2.45556  | 1         |          |
| 8040365  | 001643     | TRIB2 // tribbles homolog 2 (Drosophila) // 2a3.3 // 28951 [1] / NR                  | TRIB2                                                                                      | NM_01643    | 0.043297    | 0.043297      | 0.502521               | -2.02511             | VM up vs Control           | 10.1934                    | 2.48719     | 3.45364 | 1        |           |          |
| 8142459  | 012522     | TRAF1 // TNF receptor associated factor 1 // 7q31.3 // 2279 [1] / NM 00101805        | TRAF1                                                                                      | 12522       | 0.002625    | 0.002625      | 0.502525               | -2.02525             | VM up vs Control           | 8.3912                     | 2.48705     | 2.37158 | 1        |           |          |
| 5177     | 8159104    | NM_001417                                                                            | FUCAL // fucosylase, alpha-L, tissue 4 // 10q24.1 // 2517 [1] / ENST000                    | FUCAL       | NM_001417   | 0.00730134    | 0.00730134             | 0.502565             | -2.02565                   | VM up vs Control           | 12.7397     | 2.48907 | 1.56302  | 1         |          |
| 4865     | 789691     | ---                                                                                  | ---                                                                                        | ---         | ---         | 0.0265919     | 0.0265919              | 0.502595             | -2.02595                   | VM up vs Control           | 7.3528      | 2.49012 | 2.7093   | 1         |          |
| 20087    | 8078886    | NM_000878                                                                            | IL2RB // interleukin 2 receptor, beta // 22q13.22q13.1 // 3560 [1]                         | IL2RB       | NM_000878   | 0.0265919     | 0.0265919              | 0.502595             | -2.02595                   | VM up vs Control           | 7.3528      | 2.49012 | 2.7093   | 1         |          |
| 14512    | 8002036    | NM_015044                                                                            | ARL1 // Arp2/3 complex, Arp1 binding domain containing 1 // 12q24.1 // 1240 [1] / NM 02183 | ARL1        | NM_015044   | 0.005607      | 0.005607               | 0.500507             | -2.00507                   | VM up vs Control           | 7.42822     | 2.41755 | 1.67387  | 1         |          |
| 905      | 7945666    | NM_003978                                                                            | CTSD // cathepsin D // 11p15.5 // 5059 [1] / ENST0000236671 [1] / CTSD                     | CTSD        | NM_003978   | 0.00375307    | 0.00375307             | 0.502697             | -2.02697                   | VM up vs Control           | 16.2947     | 2.49367 | 1.22428  | 1         |          |
| 15185    | 8006239    | NM_0104492                                                                           | NF1 // neurofibromin 1 // 17q12.1 // 4763 [1] / NM 000267 [NF1]                            | NF1         | NM_0104492  | 0.042514      | 0.042514               | 0.502731             | -2.02731                   | VM up vs Control           | 5.80768     | 2.49482 | 3.43659  | 1         |          |
| 22787    | 8083872    | NM_004293                                                                            | GLP2R // Glu2-pituitary-related 2 // 9p13-p12 // 152007 [1] / NM 021343                    | GLP2R       | NM_004293   | 0.0054903     | 0.0054903              | 0.502781             | -2.02781                   | VM up vs Control           | 10.86216    | 2.49657 | 1.2016   | 1         |          |
| 2891     | 8143869    | NM_01528                                                                             | AP3B1 // adaptor protein 3B1 // 12q24.1 // 1240 [1] / NM 02183                             | AP3B1       | NM_01528    | 0.001628      | 0.001628               | 0.502782             | -2.02782                   | VM up vs Control           | 7.42822     | 2.41755 | 1.67387  | 1         |          |
| 11063    | 8073081    | NM_145298                                                                            | APOR3C // apolipoprotein B mRNA editing enzyme, catalytic polypep                          | APOR3C      | NM_145298   | 1.82E-05      | 1.82E-05               | 0.503186             | -2.03186                   | VM up vs Control           | 81.3682     | 2.5107  | 2.64848  | 1         |          |
| 21869    | 7961059    | NM_002258                                                                            | KLHL1 // killer cell lectin-like receptor subfamily B, member 1 // 1                       | KLHL1       | NM_002258   | 0.0414694     | 0.0414694              | 0.503234             | -2.03234                   | VM up vs Control           | 5.88478     | 2.51237 | 3.41541  | 1         |          |
| 26055    | 8115076    | NM_005211                                                                            | CSF1R // colony stimulating factor 1 receptor // 5q33-q35 // 1436 [1]                      | CSF1R       | NM_005211   | 0.00977723    | 0.00977723             | 0.503                | -2.03                      | VM up vs Control           | 11.8608     | 2.51465 | 1.97978  | 1         |          |
| 26078    | 8082100    | NM_017954                                                                            | POU4F1 // POU domain, class 4, transcription factor 1 // 3q21.3 // 2433.1                  | POU4F1      | NM_017954   | 0.0036446     | 0.0036446              | 0.503236             | -2.03236                   | VM up vs Control           | 7.23664     | 2.52255 | 1.93398  | 1         |          |
| 7892454  | ---        | ---                                                                                  | ---                                                                                        | ---         | ---         | 0.0166736     | 0.0166736              | 0.503669             | -2.03669                   | VM up vs Control           | 21.5247     | 2.52753 | 2.93938  | 1         |          |
| 24672    | 8082035    | NM_17862                                                                             | CDB6 // CDB6 molecule // 3q21 // 942 [1] / NM 006889 // CDB6 // CDB6                       | CDB6        | NM_17862    | 0.0127732     | 0.0127732              | 0.503688             | -2.03688                   | VM up vs Control           | 10.1861     | 2.52821 | 1.98561  | 1         |          |
| 6486     | 7918298    | NM_018716                                                                            | USL2 // USL2 // UAG1 homolog, ceramide synthase 2 // 1q21.3 // 29956 [1] / NM 18716        | USL2        | NM_018716   | 0.005451      | 0.005451               | 0.503764             | -2.03764                   | VM up vs Control           | 14.744      | 2.52488 | 1.97978  | 1</       |          |

| Column # | Transcript  | Cluster ID                                                            | gene_assignment                                                       | Gene Symbol | RefSeq      | p-value(Gene) | p-value(VA vs. Control) | Ratio(VA vs. Control) | Fold Change(VA vs. Control) | Fold Change(VA vs. Control) | Fold Change(VA vs. Control) | Description | (fGene) | (SSGene) | (SSError) | (fError) |
|----------|-------------|-----------------------------------------------------------------------|-----------------------------------------------------------------------|-------------|-------------|---------------|-------------------------|-----------------------|-----------------------------|-----------------------------|-----------------------------|-------------|---------|----------|-----------|----------|
| 8573     | 7904979     | NM 0164905                                                            | TMEM116 // transmembrane protein 216 // 11a13.1 // 51259 // ENST00    | TMEM116     | NM 0164905  | 0.0044832     | 0.0043462               | 2.15378               | 2.15378                     | 2.15378                     | 2.15378                     | 2.15378     | 15.4556 | 2.94041  | 1.52198   | 1.80     |
| 22828    | 8083673     | NM 01042706                                                           | ICI // ICI motif containing 1 // 3a25.32 // 654502 // NM 01042706     | ICI         | NM 01042706 | 0.0039316     | 0.0039316               | 2.1546                | 2.1546                      | 2.1546                      | 2.1546                      | 2.1546      | 16.8904 | 2.94332  | 1.39408   | 1.80     |
| 4174     | 7896700     | ---                                                                   | ---                                                                   | ---         | ---         | 0.0171367     | 0.0171367               | 2.15547               | 2.15547                     | 2.15547                     | 2.15547                     | 2.15547     | 8.96505 | 2.9464   | 2.62338   | 1.80     |
| 23702    | 8092176     | NM 021101                                                             | CLDN4 // claudin 11 // 3a28-a29 // 9076 // ENST000029552 // CLDN1     | CLDN1       | NM 021101   | 0.0045695     | 0.0045695               | 2.15591               | 2.15591                     | 2.15591                     | 2.15591                     | 2.15591     | 15.0582 | 2.94798  | 1.56362   | 1.80     |
| 16100    | 8016387     | NM 021300                                                             | ATAD4 // ATPase family AAA domain containing 4 // 17a21.32 // 7917    | ATAD4       | NM 021300   | 0.0024217     | 0.0024217               | 2.15629               | 2.15629                     | 2.15629                     | 2.15629                     | 2.15629     | 18.9851 | 2.94933  | 1.2428    | 1.80     |
| 2182     | 8125556     | NM 033554                                                             | HLA-DPA1 // major histocompatibility complex, class II, DP alpha 1    | HLA-DPA1    | NM 033554   | 0.020777      | 0.020777                | 2.15692               | 2.15692                     | 2.15692                     | 2.15692                     | 2.15692     | 8.24623 | 2.95156  | 2.86343   | 1.80     |
| 8178844  | NM 033554   | HLA-DPA1 // major histocompatibility complex, class II, DP alpha 1    | HLA-DPA1                                                              | NM 033554   | 0.020777    | 0.020777      | 2.15692                 | 2.15692               | 2.15692                     | 2.15692                     | 2.15692                     | 2.15692     | 8.24623 | 2.95156  | 2.86343   | 1.80     |
| 4172     | 7896718     | ---                                                                   | ---                                                                   | ---         | ---         | 0.0015894     | 0.0015894               | 2.15705               | 2.15705                     | 2.15705                     | 2.15705                     | 2.15705     | 15.0582 | 2.95195  | 2.92195   | 1.80     |
| 29713    | 8149448     | NM 020445                                                             | MSR1 // macrophage scavenger receptor 1 // 8a22 // 4481 // NM 1387    | MSR1        | NM 020445   | 0.00031686    | 0.00031686              | 2.15924               | 2.15924                     | 2.15924                     | 2.15924                     | 2.15924     | 34.8117 | 2.95983  | 0.68191   | 1.80     |
| 1552     | 7894057     | ---                                                                   | ---                                                                   | ---         | ---         | 0.0082893     | 0.0082893               | 2.16423               | 2.16423                     | 2.16423                     | 2.16423                     | 2.16423     | 12.1278 | 2.97716  | 1.96415   | 1.80     |
| 4162     | 7896688     | ---                                                                   | ---                                                                   | ---         | ---         | 0.0028982     | 0.0028982               | 2.20383               | 2.20383                     | 2.20383                     | 2.20383                     | 2.20383     | 8.66368 | 2.97796  | 2.76815   | 1.80     |
| 10467    | 7958884     | NM 016816                                                             | OAS1 // 2',5'-oligoadenylate synthetase 1, 40kDa // 12a24.1 // 4      | OAS1        | NM 016816   | 0.0072137     | 0.0072137               | 2.16553               | 2.16553                     | 2.16553                     | 2.16553                     | 2.16553     | 12.7972 | 2.98225  | 1.86431   | 1.80     |
| 7942824  | NM 010013   | RP528 // ribosomal protein S28 // 19s13.2 // 6234 // ENST000004170    | RP528                                                                 | NM 010013   | 0.0031795   | 0.0031795     | 2.16574                 | 2.16574               | 2.16574                     | 2.16574                     | 2.16574                     | 2.16574     | 17.2823 | 2.98299  | 1.38115   | 1.80     |
| 20880    | 8064388     | NM 039409                                                             | CCZorf54 // chromosome 20 open reading frame 54 // 20a13 // 133278    | CCZorf54    | NM 039409   | 0.0120532     | 0.0120532               | 2.16657               | 2.16657                     | 2.16657                     | 2.16657                     | 2.16657     | 10.2443 | 2.98597  | 2.28396   | 1.80     |
| 4875     | 7903507     | NM 00110883                                                           | FAM102B // sequence similarity 102, member B // 9 // 1a13             | FAM102B     | NM 00110883 | 0.0045315     | 0.0045315               | 2.17015               | 2.17015                     | 2.17015                     | 2.17015                     | 2.17015     | 15.0266 | 2.99871  | 1.75552   | 1.80     |
| 20314    | 8078286     | NM 009695                                                             | RARB // retinoic acid receptor, beta // 3a24 // 5915 // NM 016152     | RARB        | NM 009695   | 0.0130231     | 0.0130231               | 2.17038               | 2.17038                     | 2.17038                     | 2.17038                     | 2.17038     | 10.1041 | 2.99954  | 2.37491   | 1.80     |
| 8053484  | NM 003896   | STG3A15 // ST beta-galactosidase alpha-2, sialyltransferase 5 // 2a   | STG3A15                                                               | NM 003896   | 0.0189996   | 0.0189996     | 2.1705                  | 2.1705                | 2.1705                      | 2.1705                      | 2.1705                      | 2.1705      | 8.5846  | 2.99955  | 2.75666   | 1.80     |
| 7904287  | NM 017607   | CD2 // CD2 molecule // 1a13.1 // 914 // ENST0000369478 // CD2 //      | CD2                                                                   | NM 017607   | 0.0177323   | 0.0177323     | 2.17173                 | 2.17173               | 2.17173                     | 2.17173                     | 2.17173                     | 2.17173     | 5.50091 | 3.024    | 4.39391   | 1.80     |
| 128610   | 8081431     | NM 004527                                                             | ALCAM // activated leukocyte cell adhesion molecule // 3a13.1 // 21   | ALCAM       | NM 004527   | 0.0145844     | 0.0145844               | 2.18036               | 2.18036                     | 2.18036                     | 2.18036                     | 2.18036     | 9.63281 | 3.03517  | 2.52069   | 1.80     |
| 21122    | 7965812     | NM 024312                                                             | GNPATB // N-acetylglucosamine 1-phosphate transferase, alpha and beta | GNPATB      | NM 024312   | 0.0305858     | 0.0305858               | 2.18147               | 2.18147                     | 2.18147                     | 2.18147                     | 2.18147     | 15.3913 | 3.03912  | 3.53822   | 1.80     |
| 8057079  | NM 030643   | APOLA // apolipoprotein L // 22a11.1-a13.2 // 80832 // NM 14566       | APOLA                                                                 | NM 030643   | 0.0072819   | 0.0072819     | 2.18154                 | 2.18154               | 2.18154                     | 2.18154                     | 2.18154                     | 2.18154     | 12.7526 | 3.03936  | 1.90665   | 1.80     |
| 1549     | 7904954     | ---                                                                   | ---                                                                   | ---         | ---         | 0.0071262     | 0.0071262               | 2.18282               | 2.18282                     | 2.18282                     | 2.18282                     | 2.18282     | 12.6534 | 3.04595  | 1.92299   | 1.80     |
| 21465    | 8067040     | NM 012340                                                             | NFATC2 // nuclear factor of activated T-cells, cytoplasmic, calcine   | NFATC2      | NM 012340   | 0.00194501    | 0.00194501              | 2.18293               | 2.18293                     | 2.18293                     | 2.18293                     | 2.18293     | 20.4476 | 3.04443  | 1.91047   | 1.80     |
| 8048717  | NM 152386   | SGP2 // sphingosine 1-phosphate phosphatase 2 // 2a36.1 // 130367     | SGP2                                                                  | NM 152386   | 0.0368815   | 0.0368815     | 2.18303                 | 2.18303               | 2.18303                     | 2.18303                     | 2.18303                     | 2.18303     | 6.24658 | 3.05184  | 3.90849   | 1.80     |
| 8203     | 7937508     | NM 004357                                                             | CD151 // CD151 molecule (Raph blood group) // 11a15.5 // 977 // NM 1  | CD151       | NM 004357   | 0.0097278     | 0.0097278               | 2.18374               | 2.18374                     | 2.18374                     | 2.18374                     | 2.18374     | 6.9628  | 3.05438  | 3.50937   | 1.80     |
| 8045148  | NM 172111   | STON1 // STON1, CTF2A1L, readthrough transcript // 2a13.3 // 21       | STON1                                                                 | NM 172111   | 0.0014278   | 0.0014278     | 2.18379                 | 2.18379               | 2.18379                     | 2.18379                     | 2.18379                     | 2.18379     | 15.0582 | 3.05438  | 2.82762   | 1.80     |
| 7942569  | NM 00114521 | SLOC2B1 // solute carrier organic anion transporter family, mem       | SLOC2B1                                                               | NM 00114521 | 0.0097039   | 0.0097039     | 2.18638                 | 2.18638               | 2.18638                     | 2.18638                     | 2.18638                     | 2.18638     | 11.3951 | 3.05666  | 1.51495   | 1.80     |
| 11072    | 7964701     | NM 002076                                                             | GNS // glucosamine (N-acetyl)-6-sulfatase // 12a14 // 2799 // ENST    | GNS         | NM 002076   | 0.0050486     | 0.0050486               | 2.18721               | 2.18721                     | 2.18721                     | 2.18721                     | 2.18721     | 14.6362 | 3.05965  | 1.67238   | 1.80     |
| 8025295  | NM 010013   | RP528 // ribosomal protein S28 // 19s13.2 // 6234 // ENST000004170    | RP528                                                                 | NM 010013   | 0.0028983   | 0.0028983     | 2.18826                 | 2.18826               | 2.18826                     | 2.18826                     | 2.18826                     | 2.18826     | 17.85   | 3.06338  | 1.37295   | 1.80     |
| 7904954  | ---         | ---                                                                   | ---                                                                   | ---         | ---         | 0.0089717     | 0.0089717               | 2.18857               | 2.18857                     | 2.18857                     | 2.18857                     | 2.18857     | 10.6452 | 3.0645   | 6.90752   | 1.80     |
| 7924029  | NM 00107402 | LAMB3 // laminin, beta 3 // 1a32 // 3914 // NM 00112764 // LAM        | LAMB3                                                                 | NM 00107402 | 0.0084207   | 0.0084207     | 2.18909                 | 2.18909               | 2.18909                     | 2.18909                     | 2.18909                     | 2.18909     | 11.3067 | 3.06634  | 2.16477   | 1.80     |
| 9619     | 7950391     | NM 173582                                                             | PGCMB1 // phosphoglucomutase 2-like 1 // 11a13.4 // 28209 // ENST     | PGCMB1      | NM 173582   | 0.0092729     | 0.0092729               | 2.19259               | 2.19259                     | 2.19259                     | 2.19259                     | 2.19259     | 11.6033 | 3.07886  | 2.12274   | 1.80     |
| 8102133  | NM 000538   | TGFB // transforming growth factor, beta // 10a10.6 // 5a33 // 1      | TGFB                                                                  | NM 000538   | 0.0059154   | 0.0059154     | 2.19287                 | 2.19287               | 2.19287                     | 2.19287                     | 2.19287                     | 2.19287     | 30.6161 | 3.17324  | 0.82767   | 1.80     |
| 6095     | 7915955     | NM 19073                                                              | SPN7A // spermatogenesis associated 6 // 1a33 // 5455 // ENST00000    | SPN7A       | NM 19073    | 0.0205531     | 0.0205531               | 2.20084               | 2.20084                     | 2.20084                     | 2.20084                     | 2.20084     | 8.2868  | 3.1084   | 3.0003    | 1.80     |
| 7919800  | NM 040979   | CTSS // cathepsin S // 1a24 // 1520 // ENST000036888 // CTSS //       | CTSS                                                                  | NM 040979   | 0.010365    | 0.010365      | 2.20215                 | 2.20215               | 2.20215                     | 2.20215                     | 2.20215                     | 2.20215     | 11.0973 | 3.1131   | 2.24423   | 1.80     |
| 28301    | 8136849     | NM 01143769                                                           | GSTK1 // glutathione S-transferase kappa 1 // 7a35 // 371356 // EN    | GSTK1       | NM 01143769 | 0.0270425     | 0.0270425               | 2.20338               | 2.20338                     | 2.20338                     | 2.20338                     | 2.20338     | 7.29407 | 3.11751  | 3.14324   | 1.80     |
| 8078388  | NM 01822    | APOLC1 // apolipoprotein L1 mRNA editing enzyme, catalytic subp       | APOLC1                                                                | NM 01822    | 0.0028983   | 0.0028983     | 2.20395                 | 2.20395               | 2.20395                     | 2.20395                     | 2.20395                     | 2.20395     | 12.6534 | 3.11953  | 2.72366   | 1.80     |
| 7959267  | NM 020560   | PRRX4 // purinergic receptor P2X, ligand-gated ion channel, 4 // 12   | PRRX4                                                                 | NM 020560   | 0.0024625   | 0.0024625     | 2.20625                 | 2.20625               | 2.20625                     | 2.20625                     | 2.20625                     | 2.20625     | 18.8924 | 3.12777  | 1.24466   | 1.80     |
| 80718    | 793251      | NM 015631                                                             | TCTN3 // tectonic family member 3 // 10a21.1 // 26123 // NM 001143    | TCTN3       | NM 015631   | 0.0488102     | 0.0488102               | 2.21249               | 2.21249                     | 2.21249                     | 2.21249                     | 2.21249     | 5.38905 | 3.15015  | 4.67637   | 1.80     |
| 8112803  | NM 055779   | HPH2 // HPH2, P100a NIMIC fusion partner-like 2 // 5a14.1 // 10184 // | HPH2                                                                  | NM 055779   | 0.0123207   | 0.0123207     | 2.21312                 | 2.21312               | 2.21312                     | 2.21312                     | 2.21312                     | 2.21312     | 6.6885  | 3.15239  | 3.77052   | 1.80     |
| 24786    | 8102049     | NM 003866                                                             | WPP4 // inositol polyphosphate 4-phosphatase, type II, 105kDa //      | WPP4        | NM 003866   | 0.0001402     | 0.0001402               | 2.21423               | 2.21423                     | 2.21423                     | 2.21423                     | 2.21423     | 16.8448 | 3.15589  | 2.74261   | 1.80     |
| 6236     | 7917514     | ---                                                                   | ---                                                                   | ---         | ---         | 0.010925      | 0.010925                | 2.21453               | 2.21453                     | 2.21453                     | 2.21453                     | 2.21453     | 10.8631 | 3.15746  | 3.20023   | 1.80     |
| 9948     | 7953428     | NM 000616                                                             | CD4 // CD4 molecule // 12pter-1 // 920 // ENST0000011653 // CD4       | CD4         | NM 000616   | 0.0199272     | 0.0199272               | 2.21555               | 2.21555                     | 2.21555                     | 2.21555                     | 2.21555     | 8.40236 | 3.16113  | 3.03547   | 1.80     |
| 8114528  | NM 198282   | TMEM173 // transmembrane protein 173 // 5a13.2 // 340061 // ENST00    | TMEM173                                                               | NM 198282   | 0.0002551   | 0.0002551     | 2.21671                 | 2.21671               | 2.21671                     | 2.21671                     | 2.21671                     | 2.21671     | 13.6123 | 3.16527  | 1.26161   | 1.80     |
| 1085     | 7949698     | ---                                                                   | ---                                                                   | ---         | ---         | 0.0029819     | 0.0029819               | 2.21733               | 2.21733                     | 2.21733                     | 2.21733                     | 2.21733     | 20.7612 | 3.1675   | 1.43478   | 1.80     |
| 7957966  | NM 024655   | MYBPC1 // myosin binding protein C, slow type // 12a23.2 // 4604 //   | MYBPC1                                                                | NM 024655   | 0.0098969   | 0.0098969     | 2.21808                 | 2.21808               | 2.21808                     | 2.21808                     | 2.21808                     | 2.21808     | 14.7213 | 3.1702   | 1.72278   | 1.80     |
| 8255     | 7937802     | NM 004363                                                             | CD81 // CD81 molecule // 11a15.5 // 975 // ENST000026345 // CD81      | CD81        | NM 004363   | 0.00496495    | 0.00496495              | 2.21808               | 2.21808                     | 2.21808                     | 2.21808                     | 2.21808     | 30.6161 | 3.17324  | 0.82767   | 1.80     |
| 8044291  | NM 003643   | TRAF1 // TNF receptor-associated factor 1 // 11a12.1 // 1046 //       | TRAF1                                                                 | NM 003643   | 0.0049331   | 0.0049331     | 2.21927                 | 2.21927               | 2.21927                     | 2.21927                     | 2.21927                     | 2.21927     | 5.36432 | 3.17445  | 4.73497   | 1.80     |
| 8479     | 7939839     | NM 028843                                                             | PTPRJ // protein tyrosine phosphatase, receptor type, j // 11a12.1 // | PTPRJ       | NM 028843   | 0.0092331     | 0.0092331               | 2.22014               | 2.22014                     | 2.22014                     | 2.22014                     | 2.22014     | 16.7478 | 3.17761  | 1.2231    | 1.80     |
| 24211    | 8097657     | NM 05900                                                              | SMAD5 // SMAD family member 5 // 4a31 // 4086 // NM 001003688 // 5    | SMAD5       | NM 05900    | 0.00494518    | 0.00494518              | 2.22014               | 2.22014                     | 2.22014                     | 2.22014                     | 2.22014     | 14.7478 | 3.17761  | 1.2231    | 1.80     |
| 15004    | 8005471     | NM 010013                                                             | RP528 // ribosomal protein S28 // 19s13.2 // 6234 // ENST000004170    | RP528       | NM 010013   | 0.0028983     | 0.0028983               | 2.22437               | 2.22437                     | 2.22437                     | 2.22437                     | 2.22437     | 16.7478 | 3.17761  | 1.2231    | 1.80     |
| 9619     | 7950391     | NM 173582                                                             | PGCMB1 // phosphoglucomutase 2-like 1 // 11a13.4 // 28209 // ENST     | PGCMB1      | NM 173582   | 0.0092729     | 0.0092729               | 2.22437               | 2.22437                     | 2.22437                     | 2.22437                     | 2.22437     | 16.7478 | 3.17761  | 1.2231    | 1.80     |
| 7942569  | NM 00114521 | SLOC2B1 // solute carrier organic anion transporter family, mem       | SLOC2B1                                                               | NM 00114521 | 0.0097039   | 0.0097039     | 2.23121                 | 2.23121               | 2.23121                     | 2.23121                     | 2.23121                     | 2.23121     | 12.7526 | 3.18254  | 2.54123   | 1.80     |
| 6507     | 7919800     | NM 040979                                                             | CTSS // cathepsin S // 1a24 // 1520 // ENST000036888 // CTSS //       | CTSS        | NM 040979   | 0.010365      | 0.010365                | 2.2321                | 2.2321                      | 2.2321                      | 2.2321                      | 2.2321      | 8.1002  | 3.22454  | 3.15744   | 1.80     |
| 8129458  | NM 03155    | ARHGAP18 // Rho GTPase activating protein 18 // 6a22.33 // 93663 //   | ARHGAP18                                                              | NM 03155    | 0.00775714  | 0.00775714    | 2.23538                 | 2.23538               | 2.23538                     | 2.23538                     | 2.23                        |             |         |          |           |          |

| Column # | Transcript | Cluster ID                                                                    | gene_assignment                                                                       | Gene Symbol | RefSeq          | p-value(Gene) | p-value(VA vs Control) | Ratio(VA vs Control) | Fold-Change(VA vs Control) | Fold-Change(VA vs Control) | Description | (tGene) | (SSGene) | (SSError) | (tError) |
|----------|------------|-------------------------------------------------------------------------------|---------------------------------------------------------------------------------------|-------------|-----------------|---------------|------------------------|----------------------|----------------------------|----------------------------|-------------|---------|----------|-----------|----------|
| 21516    | 807485     | NM_003355                                                                     | UBA7 // ubiquitin-like modifier activating enzyme 7 // 3621 // 7318                   | UBA7        | NM_003355       | 0.00237894    | 0.00237894             | 2.503                | 2.503                      | VMA vs Control             | 15.0101     | 4.20499 | 1.76115  |           |          |
| 12187    | 7979663    | NM_198886                                                                     | RAB15 // RAB15, member RAS oncogene family // 14q23.3 // 376267 //                    | RAB15       | NM_198886       | 0.00474392    | 0.00474392             | 2.51085              | 2.51085                    | VMA vs Control             | 14.9739     | 4.23733 | 2.03212  |           |          |
| 8395     | 7993120    | NM_002061                                                                     | RNC1 // reticulocalbin-1, EF-hand calcium binding domain // 11p13.3                   | RNC1        | NM_002061       | 0.0243025     | 0.0243025              | 2.51249              | 2.51249                    | VMA vs Control             | 7.0173      | 4.23975 | 4.03094  |           |          |
| 16773    | 8023845    | NM_002402                                                                     | RNP2 // protein-serine/threonine phosphatase 2 // 12q24.31                            | RNP2        | NM_002402       | 0.00021166    | 0.00021166             | 2.52116              | 2.52116                    | VMA vs Control             | 13.2641     | 4.27144 | 2.4471   |           |          |
| 769047   | NM_000161  | ADM // alpha-2-macroglobulin // 12p13.3-p12.3 // 2 // ENST0000000318          | ADM                                                                                   | NM_000161   | 0.00534065      | 0.00534065    | 2.52123                | 2.52123              | VMA vs Control             | 14.3354                    | 4.27175     | 2.3839  |          |           |          |
| 26835    | 8122334    | NM_00849 // CRLR // chemokine (C-C motif) receptor-like 1 // 3q22 // 51554 // | CRLR1                                                                                 | NM_00849    | 0.0191501       | 0.0191501     | 2.52187                | 2.52187              | VMA vs Control             | 8.55444                    | 4.27711     | 3.99709 |          |           |          |
| 870      | 7893127    | NM_179954                                                                     | RBM3 // ribonucleoprotein family class B member 3 // 10q24.3 // 10184                 | RBM3        | NM_179954       | 0.0280175     | 0.0280175              | 2.52815              | 2.52815                    | VMA vs Control             | 5.28254     | 4.28156 | 2.38675  |           |          |
| 25330    | NM_001176  | BTN3A3 // butyrophilin, subfamily 3, member A3 // 6q21.3 // 10184             | BTN3A3                                                                                | NM_001176   | 0.0186808       | 0.0186808     | 2.54531                | 2.54531              | VMA vs Control             | 14.6277                    | 4.30002     | 2.02777 |          |           |          |
| 3282     | 8180400    | ---                                                                           | ---                                                                                   | ---         | ---             | 0.00517595    | 0.00517595             | 2.55632              | 2.55632                    | VMA vs Control             | 14.5623     | 4.30097 | 2.4167   |           |          |
| 990      | 7893124    | ---                                                                           | ---                                                                                   | ---         | ---             | 0.00747592    | 0.00747592             | 2.55632              | 2.55632                    | VMA vs Control             | 14.5623     | 4.30097 | 2.4167   |           |          |
| 33003    | 8179481    | NM_019111                                                                     | HLA-DRA // major histocompatibility complex, class II, DR alpha //                    | HLA-DRA     | NM_019111       | 0.00410436    | 0.00410436             | 2.56275              | 2.56275                    | VMA vs Control             | 15.781      | 4.24    | 2.427    |           |          |
| 18748    | 802468     | NM_01153                                                                      | ANXA4 // annexin A4 // 2p13 // 307 // ENST00000394295 // ANXA4 //                     | ANXA4       | NM_01153        | 0.029511      | 0.029511               | 2.57076              | 2.57076                    | VMA vs Control             | 6.99286     | 4.4534  | 5.09479  |           |          |
| 15445    | 8009553    | NM_181671                                                                     | PITPN1C1 // phosphatidylinositol transfer protein, cytoplasmic 1 // 3                 | PITPN1C1    | NM_181671       | 0.000839213   | 0.000839213            | 2.57947              | 2.57947                    | VMA vs Control             | 26.8681     | 4.48535 | 1.33522  |           |          |
| 5330     | 7907893    | NM_001531                                                                     | NR1 // major histocompatibility complex, class II-related // 10q25.3                  | NR1         | NM_001531       | 0.00175722    | 0.00175722             | 2.58029              | 2.58029                    | VMA vs Control             | 12.8525     | 4.4884  | 2.78957  |           |          |
| 6740     | 7922404    | NR_003940                                                                     | SNORD80 // small nuclear RNA, C/D box 80 // 2p77.1 // 8                               | SNORD80     | NR_003940       | 0.04003754    | 0.04003754             | 2.58885              | 2.58885                    | VMA vs Control             | 15.4874     | 4.50878 | 2.27223  |           |          |
| 28995    | 8143188    | NM_194071                                                                     | CREB3L2 // cAMP response element binding protein 3-like 2 // 7q34                     | CREB3L2     | NM_194071       | 0.00625568    | 0.00625568             | 2.58612              | 2.58612                    | VMA vs Control             | 13.2982     | 4.50973 | 2.713    |           |          |
| 5189     | 7986400    | NM_005531                                                                     | NR1 // major histocompatibility complex, class II-related // 10q25.3                  | NR1         | NM_005531       | 0.0114048     | 0.0114048              | 2.58916              | 2.58916                    | VMA vs Control             | 15.2142     | 4.52992 | 3.30828  |           |          |
| 25677    | 8111772    | NM_001343                                                                     | DAB2 // disabled homolog 2, mitogen-activated protein kinase phosphatase 2 // 11q23.3 | DAB2        | NM_001343       | 0.0141914     | 0.0141914              | 2.58919              | 2.58919                    | VMA vs Control             | 10.4612     | 4.51023 | 3.98889  |           |          |
| 7596     | 790498     | NM_016234                                                                     | ACSL5 // acyl-CoA synthetase long-chain family member 5 // 10q25.1-5                  | ACSL5       | NM_016234       | 0.005082      | 0.005082               | 2.59338              | 2.59338                    | VMA vs Control             | 14.8006     | 4.5364  | 4.2856   |           |          |
| 1746     | 803128     | NM_006847                                                                     | IL18RA // interleukin-18 receptor, subfamily B with sialomucin domain                 | IL18RA      | NM_006847       | 0.0178734     | 0.0178734              | 2.59699              | 2.59699                    | VMA vs Control             | 8.62041     | 4.54965 | 4.12647  |           |          |
| 30554    | 815765     | NM_004099                                                                     | STOM // stomatin // 9q34.1 // 2040 // NM_198194 // STOM // stomatin                   | STOM        | NM_004099       | 0.00426392    | 0.00426392             | 2.6055               | 2.6055                     | VMA vs Control             | 15.4528     | 4.55092 | 2.35772  |           |          |
| 23078    | 8086125    | NM_014811                                                                     | IL8 // lipopolysaccharide-induced cytokine // 3q22.2 // 981 // ENST00000301807        | IL8         | NM_014811       | 0.00251992    | 0.00251992             | 2.6055               | 2.6055                     | VMA vs Control             | 18.7286     | 4.58092 | 1.95676  |           |          |
| 26454    | 8118594    | NM_001211                                                                     | HLA-DPB1 // major histocompatibility complex, class II, DP beta 1 //                  | HLA-DPB1    | NM_001211       | 0.00961787    | 0.00961787             | 2.60725              | 2.60725                    | VMA vs Control             | 11.4357     | 4.58732 | 3.20913  |           |          |
| 31318    | 8180256    | ---                                                                           | ---                                                                                   | ---         | ---             | 0.0129098     | 0.0129098              | 2.60897              | 2.60897                    | VMA vs Control             | 6.6671      | 4.59364 | 5.4566   |           |          |
| 7963124  | NM_001629  | ALOKSAP // arachidonate 5-lipoxygenase-activating protein // 13q12            | ALOKSAP                                                                               | NM_001629   | 0.0061957       | 0.0061957     | 2.61415                | 2.61415              | VMA vs Control             | 14.5914                    | 4.61285     | 2.45052 |          |           |          |
| 11354    | 8165843    | NM_004042                                                                     | ARF // arylsulfinyltransferase // 12q13.3 // 416 // ENST00000393615 // ARF            | ARF         | NM_004042       | 0.00365959    | 0.00365959             | 2.61447              | 2.61447                    | VMA vs Control             | 16.2411     | 4.61385 | 2.24502  |           |          |
| 21763    | 8072710    | NM_030641                                                                     | APOL6 // apolipoprotein L6 // 22q12.3 // 80830 // ENST0000040965                      | APOL6       | NM_030641       | 0.000349197   | 0.000349197            | 2.61662              | 2.61662                    | VMA vs Control             | 35.1813     | 4.62175 | 1.0106   |           |          |
| 28808    | 8089378    | NM_20705                                                                      | NAALADL // N-acetylated alpha-linked acidic dipeptidase-like 2 //                     | NAALADL     | NM_20705        | 0.00838828    | 0.00838828             | 2.63052              | 2.63052                    | VMA vs Control             | 11.826      | 4.62729 | 3.03604  |           |          |
| 4849     | 791782     | NM_019111                                                                     | HLA-DRA // major histocompatibility complex, class II, DR alpha //                    | HLA-DRA     | NM_019111       | 0.00410436    | 0.00410436             | 2.63029              | 2.63029                    | VMA vs Control             | 15.781      | 4.24    | 2.427    |           |          |
| 2684     | 7903753    | NM_00848                                                                      | GSTM2 // glutathione S-transferase mu (2) // 1p13.3 // 2946                           | GSTM2       | NM_00848        | 0.0146312     | 0.0146312              | 2.64183              | 2.64183                    | VMA vs Control             | 9.16367     | 4.71434 | 3.92058  |           |          |
| 4849     | 8118548    | NM_019111                                                                     | HLA-DRA // major histocompatibility complex, class II, DR alpha //                    | HLA-DRA     | NM_019111       | 0.00410436    | 0.00410436             | 2.64419              | 2.64419                    | VMA vs Control             | 15.781      | 4.24    | 2.427    |           |          |
| 7419     | 7926742    | NM_001031                                                                     | IFIT3 // interferon-induced protein with tetratricopeptide repeats 3 // 12q24.31      | IFIT3       | NM_001031       | 0.00431982    | 0.00431982             | 2.64548              | 2.64548                    | VMA vs Control             | 15.2107     | 4.73489 | 2.5774   |           |          |
| 28808    | 8085544    | NM_195111                                                                     | CDC80 // coiled-coil domain containing 80 // 3q13.2 // 151887 //                      | CDC80       | NM_195111       | 0.0432198     | 0.0432198              | 2.65061              | 2.65061                    | VMA vs Control             | 5.75693     | 4.74659 | 6.95959  |           |          |
| 21801    | 8073068    | NM_014508                                                                     | AP0BEC3 // apolipoprotein B mRNA editing enzyme, catalytic polypeptide 3 //           | AP0BEC3     | NM_014508       | 0.00174897    | 0.00174897             | 2.65152              | 2.65152                    | VMA vs Control             | 21.1861     | 4.74994 | 1.79361  |           |          |
| 20700    | 8121212    | ---                                                                           | ---                                                                                   | ---         | ---             | 0.0399387     | 0.0399387              | 2.65184              | 2.65184                    | VMA vs Control             | 6.00235     | 4.75111 | 3.33224  |           |          |
| 17623    | 7961320    | NM_15321                                                                      | ERP2 // endoplasmic reticulum protein 27 // 12q13.3 // 121506 //                      | ERP2        | NM_15321        | 0.0040485     | 0.0040485              | 2.65496              | 2.65496                    | VMA vs Control             | 12.1598     | 4.76256 | 2.58123  |           |          |
| 21570    | 8016670    | NM_000397                                                                     | CVB // cytochrome B-24, beta polypeptide // 9p21.1 // 1536 // EN                      | CVB         | NM_000397       | 0.0262181     | 0.0262181              | 2.65619              | 2.65619                    | VMA vs Control             | 7.14022     | 4.7711  | 6.82324  |           |          |
| 12326    | 7977615    | NM_198232                                                                     | RNASE1 // ribonuclease, RNase A family, 1 (concentric) // 14q11.2 //                  | RNASE1      | NM_198232       | 0.0062598     | 0.0062598              | 2.65748              | 2.65748                    | VMA vs Control             | 13.5992     | 4.77183 | 2.82583  |           |          |
| 24333    | 8089611    | NM_001265                                                                     | TR1 // toll-like receptor 3 // 9q33 // 7098 // ENST00000296795 //                     | TR1         | NM_001265       | 0.0242938     | 0.0242938              | 2.65859              | 2.65859                    | VMA vs Control             | 7.92421     | 4.77592 | 8.4045   |           |          |
| 7407     | 792867     | NM_004897                                                                     | MRP1 // multidrug resistance protein 1 // 12q13.3 // 121506 //                        | MRP1        | NM_004897       | 0.0094292     | 0.0094292              | 2.65985              | 2.65985                    | VMA vs Control             | 14.9254     | 4.7849  | 6.06544  |           |          |
| 28808    | 8179519    | NM_019111                                                                     | HLA-DRA // major histocompatibility complex, class II, DR alpha //                    | HLA-DRA     | NM_019111       | 0.0147171     | 0.0147171              | 2.6663               | 2.6663                     | VMA vs Control             | 10.4612     | 4.80243 | 3.93096  |           |          |
| 33003    | 8141872    | NM_0112388                                                                    | NAPRED1 // major histocompatibility complex, class II, DR alpha //                    | NAPRED1     | NM_0112388      | 0.0493817     | 0.0493817              | 2.66906              | 2.66906                    | VMA vs Control             | 5.33448     | 4.7203  | 7.16736  |           |          |
| 813789   | 807052     | NM_0112388                                                                    | NAPRED1 // major histocompatibility complex, class II, DR alpha //                    | NAPRED1     | NM_0112388      | 0.0493817     | 0.0493817              | 2.67475              | 2.67475                    | VMA vs Control             | 5.33448     | 4.7203  | 7.16736  |           |          |
| 31024    | 8163618    | NM_005118                                                                     | TNFSF15 // tumor necrosis factor (ligand) superfamily, member 15 // 1                 | TNFSF15     | NM_005118       | 0.0355721     | 0.0355721              | 2.677                | 2.677                      | VMA vs Control             | 6.37187     | 4.84358 | 3.0112   |           |          |
| 9048     | 7945663    | ENST00000340134                                                               | CTSD // cathepsin D // 11p15.5 // 1509 // ENST00000382123 //                          | CTSD        | ENST00000340134 | 0.00355095    | 0.00355095             | 2.67786              | 2.67786                    | VMA vs Control             | 16.6184     | 4.84673 | 6.38318  |           |          |
| 9245     | 7946977    | NM_005122                                                                     | SAA4 // serum amyloid A4, constitutive // 11p15.1-p14 // 6291 // E                    | SAA4        | NM_005122       | 0.0277076     | 0.0277076              | 2.68474              | 2.68474                    | VMA vs Control             | 7.20958     | 4.872   | 5.40614  |           |          |
| 6318     | 8191495    | ---                                                                           | ---                                                                                   | ---         | ---             | 0.0049912     | 0.0049912              | 2.68499              | 2.68499                    | VMA vs Control             | 5.43409     | 4.87312 | 3.1222   |           |          |
| 13608    | 7996020    | NM_05724                                                                      | TSPN3 // tetraspanin 3 // 15q24.3 // 10099 // NM_198902 // TSPN3                      | TSPN3       | NM_05724        | 0.0068222     | 0.0068222              | 2.68652              | 2.68652                    | VMA vs Control             | 13.0724     | 4.87878 | 2.98569  |           |          |
| 6018     | 810486     | NM_003044                                                                     | STCTM1 // secreted and transmembrane 1 // 17q25 // 6398 // ENST000                    | STCTM1      | NM_003044       | 0.0230878     | 0.0230878              | 2.69803              | 2.69803                    | VMA vs Control             | 7.92538     | 4.92084 | 5.01482  |           |          |
| 14734    | 7929047    | NM_015172                                                                     | IFIT2 // interferon-induced protein with tetratricopeptide repeats 2 //               | IFIT2       | NM_015172       | 0.0238782     | 0.0238782              | 2.69953              | 2.69953                    | VMA vs Control             | 7.7538      | 4.9236  | 5.09888  |           |          |
| 9411     | 7948133    | NM_00811                                                                      | UPK // urokinase-type 1 // 9q34 // 1 // 9404 // NM_00143995 // UPK // uro             | UPK         | NM_00811        | 0.0035085     | 0.0035085              | 2.7058               | 2.7058                     | VMA vs Control             | 19.2504     | 4.94941 | 1.97913  |           |          |
| 2554     | 7985909    | ---                                                                           | ---                                                                                   | ---         | ---             | 0.000370451   | 0.000370451            | 2.71058              | 2.71058                    | VMA vs Control             | 34.5618     | 4.96697 | 1.1497   |           |          |
| 1566     | 8167185    | NM_001254                                                                     | TMP1 // TIMP metalloproteinase inhibitor 1 // 8p11.2-p11.23 // 7076                   | TMP1        | NM_001254       | 0.00656473    | 0.00656473             | 2.71857              | 2.71857                    | VMA vs Control             | 13.2881     | 4.99633 | 3.02123  |           |          |
| 30073    | 8152522    | NM_006209                                                                     | ENPP2 // ectonucleotide pyrophosphatase/phosphodiesterase 2 // 8q24                   | ENPP2       | NM_006209       | 0.0478082     | 0.0478082              | 2.72262              | 2.72262                    | VMA vs Control             | 5.45092     | 5.01123 | 3.847    |           |          |
| 10397    | 7979782    | NM_15321                                                                      | ERP2 // endoplasmic reticulum protein 27 // 12q13.3 // 121506 //                      | ERP2        | NM_15321        | 0.0040485     | 0.0040485              | 2.72727              | 2.72727                    | VMA vs Control             | 12.1598     | 4.76256 | 2.58123  |           |          |
| 21801    | 8073062    | NM_004900                                                                     | AP0BEC3 // apolipoprotein B mRNA editing enzyme, catalytic polypeptide 3 //           | AP0BEC3     | NM_004900       | 0.00283296    | 0.00283296             | 2.72772              | 2.72772                    | VMA vs Control             | 21.1861     | 4.75992 | 2.37009  |           |          |
| 2003     | 7915286    | NM_001030                                                                     | PPT1 // palmitoyl transferase 1 // 10p12 // 5538 // NM_001                            | PPT1        | NM_001030       | 0.00569498    | 0.00569498             | 2.72828              | 2.72828                    | VMA vs Control             | 14.7063     | 5.03204 | 2.85987  |           |          |
| 4803     | 8073044    | NM_008501                                                                     | GSTM2 // glutathione S-transferase mu (2) // 1p13.3 // 2946                           | GSTM2       | NM_008501       | 0.0146312     | 0.0146312              | 2.72879              | 2.72879                    | VMA vs Control             | 9.16367     | 4.71434 | 3.92058  |           |          |
| 6055     | 8113250    | NM_01040458                                                                   | ERAP1 // endoplasmic reticulum aminopeptidase 1 // 5q15 // 5152                       | ERAP1       | NM_01040458     | 0.0236863     | 0.0236863              | 2.72884              | 2.72884                    | VMA vs Control             | 10.4612     | 4.80243 | 3.93096  |           |          |
| 31754    | 8168424    | NM_005137                                                                     | SLC16A2 // solute carrier family 16, member 2 (monocarboxylate) //                    | SLC16A2     | NM_005137       | 0.00085347    |                        |                      |                            |                            |             |         |          |           |          |

| Column # | Transcript | Cluster ID   | gene_assignment                                                      | Gene Symbol | RefSeq       | p-value(Group) | p-value(VA vs. Control) | Ratio(VA vs. Control) | Fold-Change(VA vs. Control) | Fold-Change(VA vs. Control) | (Description) | f(Group) | SS(Group) | SS(Error) | f(Error) |
|----------|------------|--------------|----------------------------------------------------------------------|-------------|--------------|----------------|-------------------------|-----------------------|-----------------------------|-----------------------------|---------------|----------|-----------|-----------|----------|
| 7232     | 7927215    | NM_006988    | ALOX5 // arachidonate 5-lipoxygenase 1 // 10q11.2 // 240 // ENST0000 | ALOX5       | NM_006988    | 0.00215357     | 0.00215357              | 4.0618                | 4.0618                      | VMA up vs Control           | 19.758        | 9.8135   | 3.97347   | 1         |          |
| 24013    | 8095697    | NM_001511    | CXCL1 // chemokine (C-X-C motif) ligand 1 (melanoma growth stimulat  | CXCL1       | NM_001511    | 0.0208458      | 0.0208458               | 4.1128                | 4.1128                      | VMA up vs Control           | 8.23387       | 9.98093  | 9.97531   | 1         |          |
| 25823    | 8112980    | NM_005711    | EDL3 // EGF-like repeats and discoidin-like domains 3 // 5q14 //     | EDL3        | NM_005711    | 0.0104406      | 0.0104406               | 4.1419                | 4.1419                      | VMA up vs Control           | 11.0647       | 10.0889  | 7.29444   | 1         |          |
| 2778     | 7895294    | —            | —                                                                    | —           | —            | 0.0247558      | 0.0247558               | 4.17242               | 4.17242                     | VMA up vs Control           | 7.60589       | 10.1934  | 10.7215   | 1         |          |
| 31924    | 8170179    | NM_016267    | VGLL1 // vestigial like 1 (Drosophila) // 4z6.3 // 51442 // ENST0    | VGLL1       | NM_016267    | 0.00314646     | 0.00314646              | 4.17335               | 4.17335                     | VMA up vs Control           | 17.3417       | 10.1966  | 4.70386   | 1         |          |
| 6937     | 7924450    | NM_007207    | DUSP10 // dual specificity phosphatase 10 // 1q41 // 11221 // NM_1   | DUSP10      | NM_007207    | 0.0120063      | 0.0120063               | 4.20147               | 4.20147                     | VMA up vs Control           | 10.4511       | 10.2927  | 7.87874   | 1         |          |
| 6379     | 7918936    | NM_024626    | VFCN1 // V-set domain containing 1 cell activation inhibitor 3 // 1  | VFCN1       | NM_024626    | 0.000781297    | 0.000781297             | 4.26249               | 4.26249                     | VMA up vs Control           | 27.4796       | 10.5004  | 3.05694   | 1         |          |
| 24711    | 8102328    | NM_000204    | CFI // complement factor 1 // 4q25 // 3426 // ENST00000394634 // C   | CFI         | NM_000204    | 0.000981277    | 0.000981277             | 4.34863               | 4.34863                     | VMA up vs Control           | 25.5684       | 10.7923  | 3.19726   | 1         |          |
| 15946    | 8014903    | NM_001042471 | GSDMB // gasdermin B // 17q12 // 5587 // NM_018530 // GSDMB //       | GSDMB       | NM_001042471 | 0.00420067     | 0.00420067              | 4.36206               | 4.36206                     | VMA up vs Control           | 15.6497       | 10.8376  | 5.54007   | 1         |          |
| 27560    | 8129637    | NM_004665    | VNN2 // vanin 2 // 6p23-q24 // 8875 // NM_078488 // VNN2 // vanin    | VNN2        | NM_004665    | 0.01322713     | 0.01322713              | 4.36472               | 4.36472                     | VMA up vs Control           | 6.69173       | 10.8466  | 12.9671   | 1         |          |
| 6240     | 7917528    | —            | —                                                                    | —           | —            | 0.00151142     | 0.00151142              | 4.39448               | 4.39448                     | VMA up vs Control           | 22.2335       | 10.9468  | 3.93886   | 1         |          |
| 28607    | 8139488    | NM_00103398  | IGFBP3 // insulin-like growth factor binding protein 3 // 7p13-p     | IGFBP3      | NM_00103398  | 0.0126214      | 0.0126214               | 4.52008               | 4.52008                     | VMA up vs Control           | 10.237        | 11.3676  | 8.88357   | 1         |          |
| 21769    | 8072735    | NM_145343    | APOLL // apolipoprotein L 1 // 22q13.1 // 8542 // NM_003661 // AP    | APOLL       | NM_145343    | 0.00630136     | 0.00630136              | 4.63164               | 4.63164                     | VMA up vs Control           | 13.4755       | 11.738   | 9.68652   | 1         |          |
| 16739    | 8022656    | NM_013422    | CHST9 // carbohydrate (N-acetylglucosamine 4-0) sulfotransferase     | CHST9       | NM_013422    | 0.00331626     | 0.00331626              | 4.63306               | 4.63306                     | VMA up vs Control           | 17.4246       | 11.7427  | 5.51798   | 1         |          |
| 7316     | 7928046    | NM_012139    | TSNALS // tetraspanin 15 // 10q22.1 // 2355 // ENST00000373290 /     | TSNALS      | NM_012139    | 0.000827128    | 0.000827128             | 4.74166               | 4.74166                     | VMA up vs Control           | 29.4296       | 12.1003  | 3.28929   | 1         |          |
| 9665     | 7950810    | NM_206927    | SYTL2 // synaptotagmin-like 2 // 11q14 // 54843 // NM_206928 // SY   | SYTL2       | NM_206927    | 0.019227       | 0.019227                | 4.79767               | 4.79767                     | VMA up vs Control           | 5.83912       | 12.2836  | 11.508    | 1         |          |
| 8605     | 7940775    | NM_004585    | RARRES3 // retinoic acid receptor responder (isoxanthone induced) 3  | RARRES3     | NM_004585    | 0.00369514     | 0.00369514              | 4.82656               | 4.82656                     | VMA up vs Control           | 16.3852       | 12.3778  | 6.04339   | 1         |          |
| 26119    | 8135015    | AB030783     | MUC3B // mucin 3B, cell surface associated // 7q22 // 57876 // AF00  | MUC3B       | AB030783     | 0.0164248      | 0.0164248               | 4.9025                | 4.9025                      | VMA up vs Control           | 9.15284       | 12.6245  | 11.0344   | 1         |          |
| 23594    | 8091723    | NM_206963    | RARRES1 // retinoic acid receptor responder (isoxanthone induced) 1  | RARRES1     | NM_206963    | 0.0166452      | 0.0166452               | 5.00433               | 5.00433                     | VMA up vs Control           | 9.09993       | 12.9532  | 11.3875   | 1         |          |
| 24035    | 8095886    | NM_006419    | CXCL13 // chemokine (C-X-C motif) ligand 13 // 4q21 // 10563 // EN   | CXCL13      | NM_006419    | 0.0209222      | 0.0209222               | 5.17779               | 5.17779                     | VMA up vs Control           | 8.2202        | 13.5072  | 13.1453   | 1         |          |
| 30080    | 8152617    | NM_005328    | HAS2 // hyaluronan synthase 2 // 8q24.12 // 3037 // ENST0000030392   | HAS2        | NM_005328    | 0.00690095     | 0.00690095              | 5.30686               | 5.30686                     | VMA up vs Control           | 13.0182       | 13.9147  | 8.55092   | 1         |          |
| 25851    | 8112124    | NM_022064    | GLRX // glutaredoxin (thioltransferase) // 5q14 // 2745 // NM_0011   | GLRX        | NM_022064    | 0.00357609     | 0.00357609              | 5.3636                | 5.3636                      | VMA up vs Control           | 16.5769       | 14.0926  | 6.80104   | 1         |          |
| 24628    | 8101429    | NM_016619    | PLAC8 // placenta-specific 8 // 4q21.22 // 51316 // NM_001130716 /   | PLAC8       | NM_016619    | 0.0202948      | 0.0202948               | 5.51333               | 5.51333                     | VMA up vs Control           | 8.34331       | 14.5584  | 19.9744   | 1         |          |
| 30689    | 8158671    | NM_000050    | ASS1 // argininosuccinate synthetase 1 // 9q34.1 // 445 // NM_0540   | ASS1        | NM_000050    | 0.00305059     | 0.00305059              | 5.70001               | 5.70001                     | VMA up vs Control           | 17.5303       | 15.1319  | 6.90547   | 1         |          |
| 33020    | 8179617    | NM_007028    | TRIM31 // tripartite motif-containing 31 // 6p21.3 // 11074 // ENS   | TRIM31      | NM_007028    | 0.0476641      | 0.0476641               | 5.84906               | 5.84906                     | VMA up vs Control           | 5.45995       | 15.584   | 2.8314    | 1         |          |
| 28469    | 8138381    | NM_006408    | AGR2 // anterior gradient homolog 2 (Xenopus laevis) // 7q21.3 // 1  | AGR2        | NM_006408    | 0.0150326      | 0.0150326               | 6.17577               | 6.17577                     | VMA up vs Control           | 9.50915       | 16.5579  | 13.9301   | 1         |          |
| 4639     | 7901175    | NM_005727    | TSNPN1 // tetraspanin 1 // 1q34.1 // 10103 // ENST00000372003 // T   | TSNPN1      | NM_005727    | 0.0246151      | 0.0246151               | 6.29974               | 6.29974                     | VMA up vs Control           | 7.62656       | 16.9214  | 17.7507   | 1         |          |
| 24011    | 8095688    | NM_002993    | CXCL6 // chemokine (C-X-C motif) ligand 6 (granulocyte chemotactic   | CXCL6       | NM_002993    | 0.0180624      | 0.0180624               | 6.50333               | 6.50333                     | VMA up vs Control           | 8.77954       | 15.5113  | 15.9565   | 1         |          |
| 20745    | 8063000    | NM_006103    | WFDLC2 // WAP four-disulfide core domain 2 // 20q12-q13.2 // 10406 / | WFDLC2      | NM_006103    | 0.00832392     | 0.00832392              | 6.61473               | 6.61473                     | VMA up vs Control           | 12.108        | 17.8304  | 11.761    | 1         |          |
| 26440    | 8118345    | NM_001710    | CFB // complement factor B // 6p21.3 // 629 // BC004143 // CFB //    | CFB         | NM_001710    | 0.0477693      | 0.0477693               | 6.93188               | 6.93188                     | VMA up vs Control           | 5.45335       | 18.7523  | 27.4669   | 1         |          |
| 28482    | 8138487    | —            | —                                                                    | —           | —            | 0.00208        | 0.00208                 | 7.09501               | 7.09501                     | VMA up vs Control           | 19.9914       | 19.178   | 7.6745    | 1         |          |
| 29824    | 8150509    | NM_000930    | PLAT // plasminogen activator, tissue // 8p12 // 5327 // NM_033011   | PLAT        | NM_000930    | 0.0222861      | 0.0222861               | 7.19491               | 7.19491                     | VMA up vs Control           | 17.98642      | 19.4527  | 19.4857   | 1         |          |
| 32663    | 8178115    | NM_001710    | CFB // complement factor B // 6p21.3 // 629 // BC004143 // CFB //    | CFB         | NM_001710    | 0.0469248      | 0.0469248               | 7.32622               | 7.32622                     | VMA up vs Control           | 5.50684       | 19.8109  | 28.78     | 1         |          |
| 3185     | 8180303    | —            | —                                                                    | —           | —            | 0.0225969      | 0.0225969               | 7.72813               | 7.72813                     | VMA up vs Control           | 7.93568       | 20.8877  | 21.057    | 1         |          |
| 30690    | 8158684    | —            | —                                                                    | —           | —            | 0.00949802     | 0.00949802              | 8.28307               | 8.28307                     | VMA up vs Control           | 11.493        | 22.2884  | 15.5422   | 1         |          |
| 5442     | 7909250    | NM_153758    | IL19 // interleukin 19 // 1q32.2 // 29949 // NM_013371 // IL19 //    | IL19        | NM_153758    | 0.0324829      | 0.0324829               | 8.3067                | 8.3067                      | VMA up vs Control           | 6.67001       | 22.2886  | 26.8529   | 1         |          |
| 6887     | 7923029    | NM_022644    | PIGR // polymeric immunoglobulin receptor // 1q21-q41 // 5284 // E   | PIGR        | NM_022644    | 0.0200583      | 0.0200583               | 8.63577               | 8.63577                     | VMA up vs Control           | 8.37849       | 23.2179  | 22.149    | 1         |          |
| 5710     | 7908459    | NM_000186    | CFH // complement factor H // 1q32 // 3075 // NM_001014975 // CFH    | CFH         | NM_000186    | 0.00479345     | 0.00479345              | 8.71593               | 8.71593                     | VMA up vs Control           | 14.9172       | 23.4173  | 12.5586   | 1         |          |
| 27150    | 8125149    | NM_025257    | SLC44A4 // solute carrier family 44, member 4 // 6p21.3 // 80736 //  | SLC44A4     | NM_025257    | 0.0222679      | 0.0222679               | 9.19378               | 9.19378                     | VMA up vs Control           | 7.98943       | 24.5861  | 24.6186   | 1         |          |
| 32922    | 8178653    | NM_025257    | SLC44A4 // solute carrier family 44, member 4 // 6p21.3 // 80736 //  | SLC44A4     | NM_025257    | 0.0222679      | 0.0222679               | 9.19378               | 9.19378                     | VMA up vs Control           | 7.98943       | 24.5861  | 24.6186   | 1         |          |
| 33947    | 8179861    | NM_025257    | SLC44A4 // solute carrier family 44, member 4 // 6p21.3 // 80736 //  | SLC44A4     | NM_025257    | 0.0222679      | 0.0222679               | 9.19378               | 9.19378                     | VMA up vs Control           | 7.98943       | 24.5861  | 24.6186   | 1         |          |
| 9714     | 7951217    | NM_002423    | MMP7 // matrix metalloproteinase 7 (matrilysin, uterine) // 11q21-q2 | MMP7        | NM_002423    | 0.0077285      | 0.0077285               | 13.7483               | 13.7483                     | VMA up vs Control           | 12.4629       | 34.3135  | 22.0261   | 1         |          |
